# Supplementary material for: SO2ClF-promoted chlorination-oxidation of 2-methylindoles: a one-step synthetic method to access 2,3-difunctionalized indoles
Source: Royal Society of Chemistry journal article supplement (doi:10.1039/d3qo00879g), 2023-01-01

## Supporting Information

# **SO<sub>2</sub>ClF-promoted chlorination-oxidation of 2-methylindoles: one-step synthetic method to access 2,3-difunctionalized indoles**

Yu Zheng,<sup>\*,a</sup> Tianting Ma,<sup>a</sup> Bingcong Liu,<sup>a</sup> and Shenlin Huang<sup>\*,a</sup>

<sup>a</sup>Jiangsu Co-Innovation Center of Efficient Processing and Utilization of Forest Resources,  
International Innovation Center for Forest Chemicals and Materials, Nanjing Forestry University,  
Nanjing 210037, China

\*Email: zhengy@njfu.edu.cn; shuang@njfu.edu.cn.

## Table of Contents

|                                                                     |            |
|---------------------------------------------------------------------|------------|
| <b>I. General Information .....</b>                                 | <b>S1</b>  |
| <b>II. Preparation of the Starting Materials.....</b>               | <b>S2</b>  |
| <b>III. General Procedure for Chlorination-Oxidation.....</b>       | <b>S3</b>  |
| <b>IV. Products Characterization.....</b>                           | <b>S3</b>  |
| <b>V. Scale-Up Experiments.....</b>                                 | <b>S11</b> |
| <b>VI. Synthetic Applications of 3-Chloro-2-Formylindoles .....</b> | <b>S11</b> |
| <b>VII. References .....</b>                                        | <b>S13</b> |
| <b>VIII. NMR Spectra .....</b>                                      | <b>S14</b> |

## I. General Information

Unless otherwise stated, all glassware was oven-dried. All solvents were distilled from appropriate drying agents prior to use. All reagents were used as received from commercial suppliers unless otherwise indicated. Reactions were monitored using UV light as the visualizing agent. Flash column chromatography was performed using silica gel 60 (200-300 mesh). HRMS data were recorded on ThermoFisher LTQ Orbitrap XL or Agilent 6500QTOFMS-ESI. All  $^1\text{H}$  NMR,  $^{13}\text{C}$  NMR, and  $^{19}\text{F}$  NMR spectra were recorded on Bruker DRX600 instruments. Chemical shifts were given in parts per million (ppm,  $\delta$ ), referenced to the solvent peak of  $\text{CDCl}_3$ , defined at  $\delta = 7.26$  ( $^1\text{H}$  NMR), defined at  $\delta = 77.16$  ( $^{13}\text{C}$  NMR); or  $\text{DMSO-d}_6$ , defined at  $2.50$  ( $^1\text{H}$  NMR), defined at  $\delta = 39.52$  ( $^{13}\text{C}$  NMR). Coupling constants were quoted in Hz ( $J$ ).  $^1\text{H}$  NMR spectroscopy splitting patterns were designated as singlet (s), doublet (d), triplet (t), and quartet (q). Splitting patterns that could not be interpreted or easily visualized were designated as multiplet (m) or broad (br). In addition,  $\text{SO}_2\text{ClF}$  is a low-boiling, volatile chemical that needs to be used in fume hoods.

$\text{SO}_2\text{ClF}$  was prepared according to the literature procedure.<sup>S1</sup>

## II. Preparation of the Starting Materials

**1-1e**, **1g**, **1i-1m**, **26**, **29**, and **33** are received from commercial suppliers. **1f**,<sup>S2</sup> **1h**,<sup>S3</sup> **1n**,<sup>S4</sup> **1o**,<sup>S5</sup> **1p**,<sup>S6</sup> **1r**,<sup>S7</sup> **1s**,<sup>S8</sup> **1t**,<sup>S9</sup> **28**,<sup>S5</sup> and **31**<sup>S10</sup> are known compounds and were synthesized according to the literature. **1q** is an unknown compound and was synthesized similarly to the reported procedure.<sup>S11</sup>

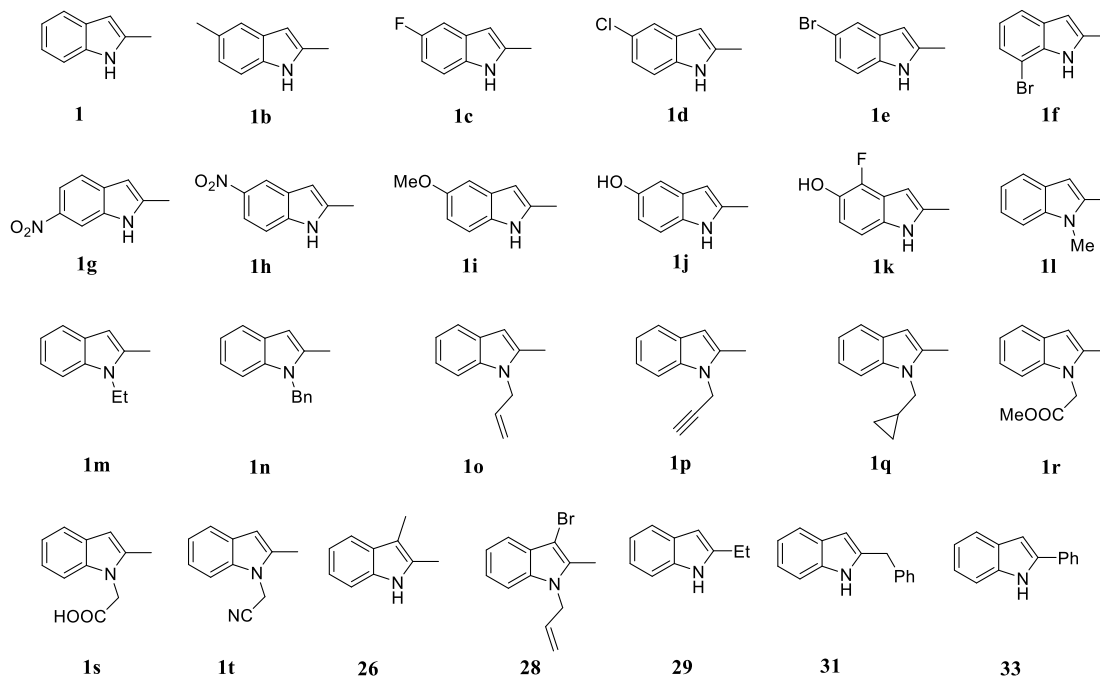

### Synthesis and Characterization of **1q**

According to the literature,<sup>S11</sup> a 50 mL round-bottom flask was charged with 2-methyl-1H-indole (5 mmol), KOH (10 mmol), 20 mL of DMSO, and (bromomethyl)cyclopropane (10 mmol). The reaction mixture was stirred at room temperature and monitored by TLC. Upon completion, the reaction mixture was quenched with water (20 mL). The mixture was extracted with ethyl acetate (3×30 mL). The combined organic phases were dried over anhydrous Na<sub>2</sub>SO<sub>4</sub>. The product **1q** was purified by silica gel chromatography with petroleum ether/EtOAc.

#### 1-(Cyclopropylmethyl)-2-methyl-1H-indole (**1q**)

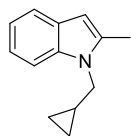

<sup>1</sup>H NMR (600 MHz, CDCl<sub>3</sub>) δ 7.56 – 7.51 (m, 1H), 7.32 (dd, *J* = 8.2, 0.7 Hz, 1H), 7.15 (td, *J* = 7.0, 1.0 Hz, 1H), 7.08 (ddd, *J* = 8.6, 2.5, 1.3 Hz, 1H), 4.01 (dd, *J* = 6.3, 1.1 Hz, 2H), 2.46 (d, *J* = 1.8 Hz, 3H), 1.21 (ddd, *J* = 8.1, 5.7, 3.4 Hz, 1H), 0.56 (d, *J* = 7.6 Hz, 2H), 0.36 (d, *J* = 4.2 Hz, 2H).

<sup>13</sup>C NMR (150 MHz, CDCl<sub>3</sub>) δ 137.1, 136.4, 128.2, 120.5, 119.8, 119.3, 109.3, 100.1, 47.2, 13.2, 11.7, 4.0.

HRMS-ESI *m/z*: [M+H]<sup>+</sup> Calcd for C<sub>13</sub>H<sub>15</sub>N 186.1277; Found 186.1286.

### III. General Procedure for Chlorination-Oxidation

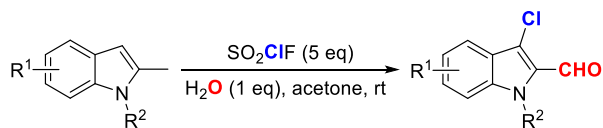

To the solution of 2-methylindole (0.2 mmol, 1.0 eq) in acetone (5 mL, 0.04 M) and H<sub>2</sub>O (3.6 μL, 1 eq) was added SO<sub>2</sub>ClF (1 mmol, 5 eq, 1 M in anhydrous PhCF<sub>3</sub>) dropwise, and then stirred at room temperature. After the completion of the reaction, as indicated by TLC, the reaction was quenched with water. The resulting mixture was extracted with ethyl acetate and the combined organic layers were dried over Na<sub>2</sub>SO<sub>4</sub> and evaporated under reduced pressure. The residue was purified by column chromatography (petroleum ether/ethyl acetate = 20:1 to 4:1) on silica gel to afford the corresponding products.

### IV. Products Characterization

#### 3-Chloro-1*H*-indole-2-carbaldehyde (2)

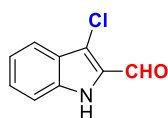

Yellow solid; 3 h; 34.8 mg, 97% yield; R<sub>f</sub> = 0.5, petroleum ether/ethyl acetate = 10/1.

<sup>1</sup>H NMR (600 MHz, CDCl<sub>3</sub>) δ 10.06 (s, 1H), 9.65 (s, 1H), 7.75 (dd, *J* = 8.2, 0.6 Hz, 1H), 7.47 – 7.42 (m, 2H), 7.24 (ddd, *J* = 8.0, 6.7, 3.4 Hz, 1H).

<sup>13</sup>C NMR (150 MHz, CDCl<sub>3</sub>) δ 180.2, 136.5, 130.3, 128.5, 125.5, 121.8, 120.6, 117.9, 112.8.

All analytic data match the reported data.<sup>S12</sup>

#### 3-Chloro-5-methyl-1*H*-indole-2-carbaldehyde (3)

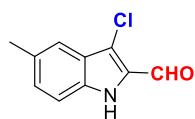

White solid; 6 h; 25.4 mg, 66% yield; R<sub>f</sub> = 0.6, petroleum ether/ethyl acetate = 10/1.

<sup>1</sup>H NMR (600 MHz, CDCl<sub>3</sub>) δ 10.03 (s, 1H), 9.25 (s, 1H), 7.51 (s, 1H), 7.33 (d, *J* = 8.5 Hz, 1H), 7.28 – 7.25 (m, 1H), 2.47 (s, 3H).

<sup>13</sup>C NMR (150 MHz, CDCl<sub>3</sub>) δ 180.2, 135.1, 131.6, 130.8, 130.5, 125.9, 119.7, 117.4, 112.6, 21.5.

All analytic data match the reported data.<sup>S13</sup>

#### 3-Chloro-6-methyl-1*H*-indole-2-carbaldehyde (4)

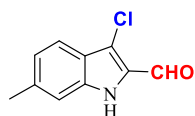



White solid; 14 h; 19 mg, 49% yield;  $R_f = 0.6$ , petroleum ether/ethyl acetate = 4/1.

$^1\text{H NMR}$  (600 MHz,  $\text{CDCl}_3$ )  $\delta$  10.01 (s, 1H), 9.12 (s, 1H), 7.62 (d,  $J = 8.3$  Hz, 1H), 7.21 (s, 1H), 7.07 (dd,  $J = 8.3, 0.6$  Hz, 1H), 2.49 (s, 3H).

$^{13}\text{C NMR}$  (150 MHz,  $\text{CDCl}_3$ )  $\delta$  180.1, 139.5, 137.3, 130.1, 124.2, 123.7, 120.3, 118.3, 112.4, 22.3.

HRMS-ESI  $m/z$ :  $[\text{M}+\text{H}]^+$  Calcd for  $\text{C}_{10}\text{H}_9\text{ClNO}$  194.0367; Found 194.0364.

### 3-Chloro-5-fluoro-1H-indole-2-carbaldehyde (5)

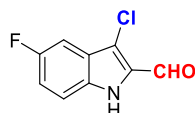

Yellow solid; 10 h; 33.6 mg, 85% yield;  $R_f = 0.5$ , petroleum ether/ethyl acetate = 4/1.

$^1\text{H NMR}$  (600 MHz,  $\text{DMSO}-d_6$ )  $\delta$  12.38 (s, 1H), 9.98 (s, 1H), 7.49 (dd,  $J = 9.1, 4.4$  Hz, 1H), 7.41 (dd,  $J = 8.9, 2.4$  Hz, 1H), 7.29 (td,  $J = 9.2, 2.5$  Hz, 1H).

$^{13}\text{C NMR}$  (150 MHz,  $\text{DMSO}-d_6$ )  $\delta$  180.8, 158.9, 157.3, 133.6, 132.0, 124.8 (d,  $J = 10.6$  Hz), 117.4, 117.2, 115.7 (d,  $J = 9.6$  Hz), 114.4 (d,  $J = 6.0$  Hz), 104.0, 103.9.

All analytic data match the reported data.<sup>S12</sup>

### 3,5-Dichloro-1H-indole-2-carbaldehyde (6)

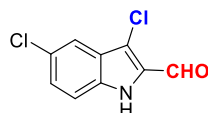

White solid; 6 h; 25.5 mg, 60% yield;  $R_f = 0.6$ , petroleum ether/ethyl acetate = 10/1.

$^1\text{H NMR}$  (600 MHz,  $\text{DMSO}-d_6$ )  $\delta$  12.46 (s, 1H), 9.99 (s, 1H), 7.70 (d,  $J = 1.9$  Hz, 1H), 7.49 (d,  $J = 8.8$  Hz, 1H), 7.41 (dd,  $J = 8.9, 2.0$  Hz, 1H).

$^{13}\text{C NMR}$  (150 MHz,  $\text{DMSO}-d_6$ )  $\delta$  180.5, 134.8, 131.5, 127.8, 126.1, 125.3, 118.5, 115.4, 113.2.

All analytic data match the reported data.<sup>S12</sup>

### 5-Bromo-3-chloro-1H-indole-2-carbaldehyde (7)

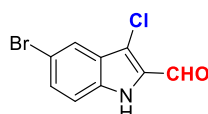

White solid; 8 h; 40 mg, 77% yield;  $R_f = 0.7$ , petroleum ether/ethyl acetate = 10/1.

$^1\text{H NMR}$  (600 MHz,  $\text{DMSO}-d_6$ )  $\delta$  12.47 (s, 1H), 9.99 (s, 1H), 7.84 (s, 1H), 7.52 (dd,  $J = 8.8, 1.6$  Hz, 1H), 7.44 (d,  $J = 8.8$  Hz, 1H).

$^{13}\text{C NMR}$  (150 MHz,  $\text{DMSO}-d_6$ )  $\delta$  180.5, 135.0, 131.3, 130.3, 125.9, 121.6, 115.7, 113.9, 113.1.

All analytic data match the reported data.<sup>S12</sup>

### 6-Bromo-3-chloro-1H-indole-2-carbaldehyde (8)

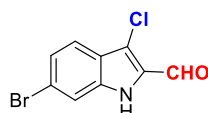

Yellow solid; 7 h; 44.5 mg, 86% yield;  $R_f = 0.6$ , petroleum ether/ethyl acetate = 4/1.  
 $^1\text{H NMR}$  (600 MHz,  $\text{DMSO-}d_6$ )  $\delta$  12.39 (s, 1H), 9.99 (s, 1H), 7.63 (d,  $J = 9.0$  Hz, 2H), 7.33 (dd,  $J = 8.6, 1.7$  Hz, 1H).  
 $^{13}\text{C NMR}$  (150 MHz,  $\text{DMSO-}d_6$ )  $\delta$  180.4, 137.0, 131.0, 124.7, 123.4, 121.5, 120.5, 115.9, 114.4.  
**HRMS-ESI**  $m/z$ :  $[\text{M}+\text{H}]^+$  Calcd for  $\text{C}_9\text{H}_6\text{BrClNO}$  257.9316; Found 257.9319.

### 7-Bromo-3-chloro-1*H*-indole-2-carbaldehyde (9)

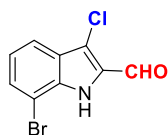

Yellow solid; 6 h; 22.3 mg, 43% yield.  $R_f = 0.6$ , petroleum ether/ethyl acetate = 10/1.  
 $^1\text{H NMR}$  (600 MHz,  $\text{CDCl}_3$ )  $\delta$  10.05 (s, 1H), 9.04 (s, 1H), 7.67 (d,  $J = 8.1$  Hz, 1H), 7.57 (d,  $J = 7.5$  Hz, 1H), 7.10 (t,  $J = 7.8$  Hz, 1H).  
 $^{13}\text{C NMR}$  (150 MHz,  $\text{CDCl}_3$ )  $\delta$  179.9, 135.0, 130.8, 130.6, 126.6, 122.9, 119.9, 118.0, 106.1.  
All analytic data match the reported data.<sup>S12</sup>

### 3-Chloro-6-nitro-1*H*-indole-2-carbaldehyde (10)

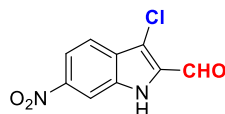

White solid; 31 h; 11.1 mg, 25% yield;  $R_f = 0.7$ , petroleum ether/ethyl acetate = 4/1.  
 $^1\text{H NMR}$  (600 MHz,  $\text{DMSO-}d_6$ )  $\delta$  12.94 (s, 1H), 10.07 (s, 1H), 8.30 (s, 1H), 8.00 (d,  $J = 8.9$  Hz, 1H), 7.89 (d,  $J = 8.9$  Hz, 1H).  
 $^{13}\text{C NMR}$  (150 MHz,  $\text{DMSO-}d_6$ )  $\delta$  181.1, 146.1, 134.5, 134.3, 128.2, 120.8, 115.7, 113.4, 110.1.  
**HRMS-ESI**  $m/z$ :  $[\text{M}-\text{H}]^-$  Calcd for  $\text{C}_9\text{H}_4\text{ClN}_2\text{O}_3$  222.9910; Found 222.9919.

### (3-Chloro-6-nitro-1*H*-indol-2-yl)methanol (11)

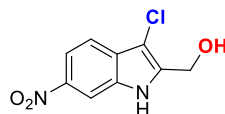

Yellow solid, 31 h, 24.2 mg, 53% yield;  $R_f = 0.6$ , petroleum ether/ethyl acetate = 4/1.  
 $^1\text{H NMR}$  (600 MHz,  $\text{DMSO-}d_6$ )  $\delta$  12.52 (s, 1H), 8.34 (d,  $J = 1.9$  Hz, 1H), 7.98 (dd,  $J = 8.8, 2.1$  Hz, 1H), 7.66 (d,  $J = 8.8$  Hz, 1H), 4.98 (s, 2H).  
 $^{13}\text{C NMR}$  (150 MHz,  $\text{DMSO-}d_6$ )  $\delta$  143.5, 136.6, 133.0, 128.8, 118.2, 115.3, 109.0, 104.2, 35.4.  
**HRMS-ESI**  $m/z$ :  $[\text{M}+\text{H}]^+$  Calcd for  $\text{C}_9\text{H}_8\text{ClN}_2\text{O}_3$  227.0218; Found 227.0226.

### (3-Chloro-5-nitro-1*H*-indol-2-yl)methanol (12)

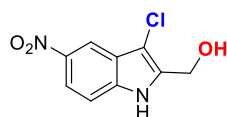

Yellow solid; 29 h; 30.6 mg, 68% yield;  $R_f = 0.4$ , petroleum ether/ethyl acetate = 4/1.  
 $^1\text{H NMR}$  (600 MHz,  $\text{DMSO-}d_6$ )  $\delta$  12.51 (s, 1H), 8.36 (d,  $J = 2.1$  Hz, 1H), 8.09 (dd,  $J = 9.0, 2.3$  Hz, 1H), 7.61 (d,  $J = 9.0$  Hz, 1H), 4.95 (s, 2H).  
 $^{13}\text{C NMR}$  (150 MHz,  $\text{DMSO-}d_6$ )  $\delta$  141.5, 137.7, 134.1, 123.8, 118.5, 114.5, 113.0, 105.6, 35.4.  
**HRMS-ESI**  $m/z$ :  $[\text{M}+\text{H}]^+$  Calcd for  $\text{C}_9\text{H}_8\text{ClN}_2\text{O}_3$  227.0218; Found 227.0217.

### 3-Chloro-5-methoxy-1H-indole-2-carbaldehyde (13)

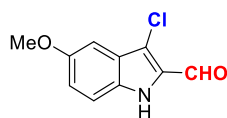

White solid; 7 min; 20.0 mg, 48% yield;  $R_f = 0.6$ , petroleum ether/ethyl acetate = 4/1.  
 $^1\text{H NMR}$  (600 MHz,  $\text{DMSO-}d_6$ )  $\delta$  12.17 (s, 1H), 9.95 (s, 1H), 7.38 (d,  $J = 9.0$  Hz, 1H), 7.07 (dd,  $J = 9.0, 2.4$  Hz, 1H), 7.02 (d,  $J = 2.3$  Hz, 1H), 3.82 (s, 3H).  
 $^{13}\text{C NMR}$  (150 MHz,  $\text{DMSO-}d_6$ )  $\delta$  180.0, 154.9, 132.0, 130.6, 124.7, 120.0, 114.8, 113.5, 98.5, 55.4.  
**HRMS-ESI**  $m/z$ :  $[\text{M}+\text{H}]^+$  Calcd for  $\text{C}_{10}\text{H}_9\text{ClNO}_2$  210.0318; Found 210.0320.

### 3,4-Dichloro-5-methoxy-1H-indole-2-carbaldehyde (14)

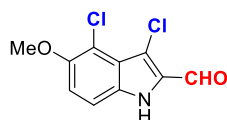

Yellow solid; 7 min; 19.8 mg, 41% yield;  $R_f = 0.5$ , petroleum ether/ethyl acetate = 4/1.  
 $^1\text{H NMR}$  (600 MHz,  $\text{DMSO-}d_6$ )  $\delta$  12.39 (s, 1H), 9.98 (s, 1H), 7.40 (d,  $J = 9.1$  Hz, 1H), 7.35 (d,  $J = 9.1$  Hz, 1H), 3.87 (s, 3H).  
 $^{13}\text{C NMR}$  (150 MHz,  $\text{DMSO-}d_6$ )  $\delta$  180.6, 150.0, 133.0, 132.0, 121.0, 116.1, 113.0, 112.6, 111.9, 57.4.  
**HRMS-ESI**  $m/z$ :  $[\text{M}-\text{H}]^-$  Calcd for  $\text{C}_{10}\text{H}_6\text{Cl}_2\text{NO}_2$  241.9976; Found 241.9773

### 3,4-Dichloro-5-hydroxy-1H-indole-2-carbaldehyde (15)

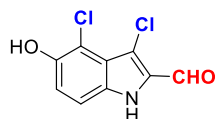

Yellow solid; 7 min; 33.2 mg, 72% yield;  $R_f = 0.4$ , petroleum ether/ethyl acetate = 4/1.  
 $^1\text{H NMR}$  (600 MHz,  $\text{DMSO-}d_6$ )  $\delta$  12.30 (s, 1H), 9.95 (s, 1H), 9.87 (s, 1H), 7.28 (d,  $J = 8.9$  Hz, 1H), 7.13 (d,  $J = 8.9$  Hz, 1H).  
 $^{13}\text{C NMR}$  (150 MHz,  $\text{DMSO-}d_6$ )  $\delta$  180.4, 148.3, 132.3, 131.4, 121.1, 119.6, 113.0, 112.5, 108.7.  
**HRMS-ESI**  $m/z$ :  $[\text{M}-\text{H}]^-$  Calcd for  $\text{C}_9\text{H}_4\text{Cl}_2\text{NO}_2$  227.9619; Found 227.9616.

### 3-Chloro-4-fluoro-5-hydroxy-1H-indole-2-carbaldehyde (16)

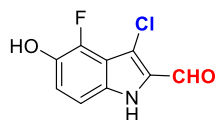

Yellow solid; 4 h; 18.5 mg, 43% yield;  $R_f = 0.4$ , petroleum ether/ethyl acetate = 4/1.

$^1\text{H NMR}$  (600 MHz,  $\text{DMSO-}d_6$ )  $\delta$  12.24 (s, 1H), 9.92 (s, 1H), 9.52 (s, 1H), 7.11 (s, 1H).

$^{13}\text{C NMR}$  (150 MHz,  $\text{DMSO-}d_6$ )  $\delta$  180.1, 143.5, 141.8, 137.7 (d,  $J = 10.0$  Hz), 132.3 (d,  $J = 6.2$  Hz), 130.9, 121.2, 115.0 (d,  $J = 15.1$  Hz), 110.5, 109.5 (d,  $J = 4.8$  Hz).

$^{19}\text{F NMR}$  (565 MHz,  $\text{DMSO-}d_6$ )  $\delta$  -151.1.

**HRMS-ESI**  $m/z$ :  $[\text{M-H}]^-$  Calcd for  $\text{C}_9\text{H}_4\text{ClFNO}_2$  211.9915; Found 211.9915.

### 3-Chloro-1-methyl-1H-indole-2-carbaldehyde (17)

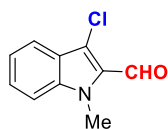

Yellow solid; 11 h; 33.9 mg, 88% yield;  $R_f = 0.7$ , petroleum ether/ethyl acetate = 10/1.

$^1\text{H NMR}$  (600 MHz,  $\text{CDCl}_3$ )  $\delta$  10.15 (s, 1H), 7.72 (d,  $J = 8.2$  Hz, 1H), 7.45 (ddd,  $J = 8.2, 6.9, 1.1$  Hz, 1H), 7.35 (d,  $J = 8.6$  Hz, 1H), 7.25 – 7.19 (m, 1H), 4.04 (s, 3H).

$^{13}\text{C NMR}$  (150 MHz,  $\text{CDCl}_3$ )  $\delta$  181.4, 138.8, 129.2, 128.2, 124.3, 121.6, 120.6, 119.3, 110.6, 31.9.

All analytic data match the reported data.<sup>S12</sup>

### 3-Chloro-1-ethyl-1H-indole-2-carbaldehyde (18)

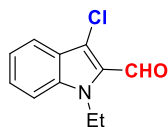

Yellow solid; 11 h; 41.1 mg, 99% yield;  $R_f = 0.7$ , petroleum ether/ethyl acetate = 10/1.

$^1\text{H NMR}$  (600 MHz,  $\text{CDCl}_3$ )  $\delta$  10.17 (s, 1H), 7.74 (d,  $J = 8.2$  Hz, 1H), 7.45 (dd,  $J = 11.5, 3.9$  Hz, 1H), 7.39 (d,  $J = 8.5$  Hz, 1H), 7.22 (t,  $J = 7.5$  Hz, 1H), 4.58 (q,  $J = 7.2$  Hz, 2H), 1.36 (t,  $J = 7.2$  Hz, 3H).

$^{13}\text{C NMR}$  (150 MHz,  $\text{CDCl}_3$ )  $\delta$  180.9, 137.7, 128.4, 128.1, 124.4, 121.4, 120.6, 119.5, 110.5, 39.9, 15.5.

All analytic data match the reported data.<sup>S12</sup>

### 1-Benzyl-3-chloro-1H-indole-2-carbaldehyde (19)

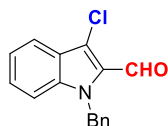

White solid; 12 h; 50.0 mg, 93% yield;  $R_f = 0.8$ , petroleum ether/ethyl acetate = 10/1.

$^1\text{H NMR}$  (600 MHz,  $\text{CDCl}_3$ )  $\delta$  10.21 (s, 1H), 7.78 (d,  $J = 8.2$  Hz, 1H), 7.45 – 7.41 (m, 1H), 7.38 (d,  $J = 8.5$  Hz, 1H), 7.26 (dt,  $J = 16.3, 7.2$  Hz, 4H), 7.11 (d,  $J = 7.2$  Hz, 2H), 5.81 (s, 2H).

$^{13}\text{C}$  NMR (150 MHz,  $\text{CDCl}_3$ )  $\delta$  181.1, 138.6, 137.4, 128.83, 128.79, 128.5, 127.7, 126.7, 124.7, 121.9, 120.8, 120.4, 111.3, 48.2.

All analytic data match the reported data.<sup>S12</sup>

### 1-Allyl-3-chloro-1H-indole-2-carbaldehyde (20)

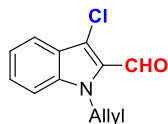

White solid; 10 h; 28.1 mg, 64% yield;  $R_f$  = 0.6, petroleum ether/ethyl acetate = 10/1.

$^1\text{H}$  NMR (600 MHz,  $\text{CDCl}_3$ )  $\delta$  10.17 (s, 1H), 7.75 (d,  $J$  = 8.2 Hz, 1H), 7.44 (ddd,  $J$  = 8.2, 6.9, 1.1 Hz, 1H), 7.35 (d,  $J$  = 8.6 Hz, 1H), 7.25 – 7.21 (m, 1H), 5.95 (ddt,  $J$  = 17.1, 10.3, 5.2 Hz, 1H), 5.18 (dt,  $J$  = 5.1, 1.6 Hz, 2H), 5.15 – 5.10 (m, 1H), 4.95 (ddd,  $J$  = 17.1, 2.7, 1.6 Hz, 1H).

$^{13}\text{C}$  NMR (150 MHz,  $\text{CDCl}_3$ )  $\delta$  181.0, 138.3, 133.2, 128.6, 128.3, 124.6, 121.7, 120.7, 120.0, 116.8, 111.0, 47.0.

All analytic data match the reported data.<sup>S12</sup>

### 3-Chloro-1-(prop-2-yn-1-yl)-1H-indole-2-carbaldehyde (21)

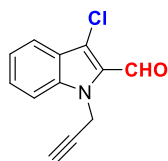

Yellow solid; 10 h; 19.5 mg, 45% yield.  $R_f$  = 0.6, petroleum ether/ethyl acetate = 10/1.

$^1\text{H}$  NMR (600 MHz,  $\text{CDCl}_3$ )  $\delta$  10.17 (s, 1H), 7.76 (d,  $J$  = 8.1 Hz, 1H), 7.51 (d,  $J$  = 3.7 Hz, 2H), 7.28 (dt,  $J$  = 8.0, 3.9 Hz, 1H), 5.43 (d,  $J$  = 2.5 Hz, 2H), 2.28 (s, 1H).

$^{13}\text{C}$  NMR (150 MHz,  $\text{CDCl}_3$ )  $\delta$  181.0, 138.0, 128.6, 128.0, 124.8, 122.1, 120.9, 120.8, 110.9, 77.9, 72.8, 34.0.

All analytic data match the reported data.<sup>S12</sup>

### 3-Chloro-1-(cyclopropylmethyl)-1H-indole-2-carbaldehyde (22)

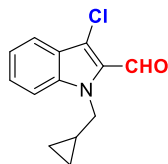

Yellow solid; 14 h; 37.4 mg, 80% yield;  $R_f$  = 0.5, petroleum ether/ethyl acetate = 10/1.

$^1\text{H}$  NMR (600 MHz,  $\text{CDCl}_3$ )  $\delta$  10.18 (s, 1H), 7.74 (d,  $J$  = 8.2 Hz, 1H), 7.46 – 7.43 (m, 1H), 7.40 (d,  $J$  = 8.5 Hz, 1H), 7.24 – 7.21 (m, 1H), 4.47 (d,  $J$  = 7.0 Hz, 2H), 1.31 – 1.26 (m, 1H), 0.50 – 0.46 (m, 2H), 0.43 – 0.39 (m, 2H).

$^{13}\text{C}$  NMR (150 MHz,  $\text{CDCl}_3$ )  $\delta$  181.2, 138.4, 128.7, 128.2, 124.6, 122.1, 121.5, 120.7, 120.0, 111.1, 48.8, 12.0, 3.7.

HRMS-ESI  $m/z$ :  $[\text{M}+\text{H}]^+$  Calcd for  $\text{C}_{13}\text{H}_{13}\text{ClNO}$  234.0680; Found 234.0680.

### Methyl 2-(3-chloro-2-formyl-1*H*-indol-1-yl)acetate (23)

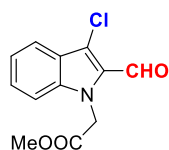

Yellow solid; 10 h; 32.2 mg, 64% yield.  $R_f = 0.6$ , petroleum ether/ethyl acetate = 10/1.

$^1\text{H NMR}$  (600 MHz,  $\text{CDCl}_3$ )  $\delta$  10.13 (s, 1H), 7.77 (d,  $J = 8.1$  Hz, 1H), 7.47 (dd,  $J = 8.4, 7.0$  Hz, 1H), 7.27 (d,  $J = 8.0$  Hz, 2H), 5.30 (s, 2H), 3.75 (s, 3H).

$^{13}\text{C NMR}$  (150 MHz,  $\text{CDCl}_3$ )  $\delta$  181.2, 168.7, 138.5, 128.9, 128.7, 124.6, 122.1, 120.9, 120.7, 109.9, 52.6, 46.0.

All analytic data match the reported data.<sup>S14</sup>

### 2-(3-Chloro-2-formyl-1*H*-indol-1-yl)acetic acid (24)

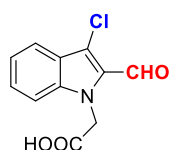

White solid; 7 h; 24.1 mg, 51% yield.  $R_f = 0.7$ , petroleum ether/ethyl acetate = 6/4.

$^1\text{H NMR}$  (600 MHz,  $\text{DMSO-}d_6$ )  $\delta$  13.07 (s, 1H), 10.06 (s, 1H), 7.74 (t,  $J = 7.8$  Hz, 2H), 7.54 – 7.48 (m, 1H), 7.33 – 7.27 (m, 1H), 5.30 (s, 2H).

$^{13}\text{C NMR}$  (150 MHz,  $\text{DMSO-}d_6$ )  $\delta$  181.1, 169.8, 138.2, 128.8, 128.3, 123.4, 122.1, 119.7, 117.6, 111.6, 46.2.

**HRMS-ESI**  $m/z$ :  $[\text{M-H}]^-$  Calcd for  $\text{C}_{11}\text{H}_7\text{ClNO}_3$  236.0114; Found 236.0116.

### 2-(3-Chloro-2-formyl-1*H*-indol-1-yl)acetonitrile (25)

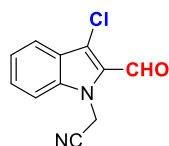

White solid; 4 h; 19.5 mg, 45% yield;  $R_f = 0.6$ , petroleum ether/ethyl acetate = 4/1.

$^1\text{H NMR}$  (600 MHz,  $\text{CDCl}_3$ )  $\delta$  10.16 (s, 1H), 7.80 (d,  $J = 8.1$  Hz, 1H), 7.59 (ddd,  $J = 8.3, 7.1, 1.1$  Hz, 1H), 7.45 (d,  $J = 8.5$  Hz, 1H), 7.38 – 7.34 (m, 1H), 5.60 (s, 2H).

$^{13}\text{C NMR}$  (150 MHz,  $\text{CDCl}_3$ )  $\delta$  181.3, 137.9, 129.8, 127.9, 125.1, 123.1, 122.6, 121.4, 114.3, 110.1, 32.5.

**HRMS-ESI**  $m/z$ :  $[\text{M+H}]^+$  Calcd for  $\text{C}_{11}\text{H}_8\text{ClNO}$  219.0320; Found 219.0325.

### 3-Chloro-1-(prop-2-yn-1-yl)indolin-2-one (27)

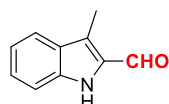

White solid; 1.5 h; 26.1 mg, 82% yield;  $R_f = 0.6$ , petroleum ether/ethyl acetate = 4/1.

$^1\text{H NMR}$  (600 MHz,  $\text{CDCl}_3$ )  $\delta$  10.05 (s, 1H), 9.14 (s, 1H), 7.71 (d,  $J = 8.1$  Hz, 1H), 7.43 – 7.37 (m, 2H), 7.16 (ddd,  $J = 8.0, 6.2, 1.7$  Hz, 1H), 2.65 (s, 3H).

$^{13}\text{C NMR}$  (150 MHz,  $\text{CDCl}_3$ )  $\delta$  180.7, 137.7, 132.3, 128.3, 127.8, 125.2, 121.5, 120.6,

112.4, 8.5.

**HRMS-ESI**  $m/z$ :  $[M+H]^+$  Calcd for  $C_{10}H_{10}NO$  160.0757; Found 160.0759.

### 2-Chloro-1-(3-chloro-1*H*-indol-2-yl)ethan-1-one (30)

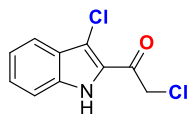

White solid; 7 min; 27.7 mg, 61% yield;  $R_f$  = 0.6, petroleum ether/ethyl acetate = 10/1.

**$^1H$  NMR** (600 MHz,  $DMSO-d_6$ )  $\delta$  12.18 (s, 1H), 7.65 (d,  $J$  = 8.2 Hz, 1H), 7.50 (d,  $J$  = 8.4 Hz, 1H), 7.40 (ddd,  $J$  = 8.2, 6.9, 1.0 Hz, 1H), 7.23 – 7.20 (m, 1H), 5.11 (s, 2H).

**$^{13}C$  NMR** (150 MHz,  $DMSO-d_6$ )  $\delta$  182.9, 135.8, 128.6, 127.1, 125.0, 121.4, 119.7, 113.3, 110.0, 48.3.

**HRMS-ESI**  $m/z$ :  $[M+K]^+$  Calcd for  $C_{10}H_7Cl_2NOK$  265.9535; Found 265.9536.

### (3-Chloro-1*H*-indol-2-yl)(phenyl)methanone (32)

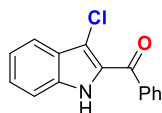

White solid; 7 min; 42.9 mg, 84% yield;  $R_f$  = 0.5, petroleum ether/ethyl acetate = 10/1.

**$^1H$  NMR** (600 MHz,  $CDCl_3$ )  $\delta$  9.71 (s, 1H), 7.93 – 7.89 (m, 2H), 7.74 (d,  $J$  = 8.1 Hz, 1H), 7.63 (t,  $J$  = 7.5 Hz, 1H), 7.53 (t,  $J$  = 7.7 Hz, 2H), 7.46 (d,  $J$  = 8.3 Hz, 1H), 7.44 – 7.40 (m, 1H), 7.26 – 7.21 (m, 1H).

**$^{13}C$  NMR** (150 MHz,  $CDCl_3$ )  $\delta$  188.1, 137.7, 135.8, 132.8, 130.0, 129.7, 128.4, 127.5, 126.6, 121.6, 120.7, 112.7, 112.6.

**HRMS-ESI**  $m/z$ :  $[M+H]^+$  Calcd for  $C_{15}H_{11}ClNO$  256.0524; Found 256.0531.

### 3,3-Dichloro-2-phenyl-3*H*-indole (34)

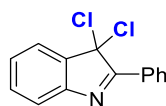

Yellow solid; 40 min; 41.7 mg, 80% yield;  $R_f$  = 0.8, petroleum ether/ethyl acetate = 10/1.

**$^1H$  NMR** (600 MHz,  $CDCl_3$ )  $\delta$  8.49 – 8.43 (m, 2H), 7.74 (d,  $J$  = 7.4 Hz, 1H), 7.63 (d,  $J$  = 7.7 Hz, 1H), 7.59 – 7.51 (m, 3H), 7.47 (td,  $J$  = 7.6, 0.4 Hz, 1H), 7.38 (t,  $J$  = 7.5 Hz, 1H).

**$^{13}C$  NMR** (150 MHz,  $CDCl_3$ )  $\delta$  172.0, 149.4, 140.0, 132.2, 131.6, 129.5, 128.8, 128.7, 128.0, 122.8, 121.7, 80.3.

All analytic data match the reported data.<sup>S15</sup>

## V. Scale-Up Experiments

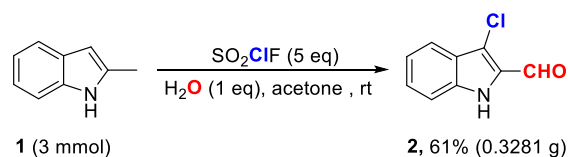

To the solution of **1** (3 mmol, 1.0 eq) in acetone (20 mL) and H<sub>2</sub>O (54 μL, 1 eq) was added SO<sub>2</sub>ClF (15 mmol, 5 eq, 1 M in anhydrous PhCF<sub>3</sub>), and then stirred at room temperature. After the completion of the reaction, as indicated by TLC, the reaction was quenched with water. The resulting mixture was extracted with ethyl acetate and the combined organic layers were dried over Na<sub>2</sub>SO<sub>4</sub> and evaporated under reduced pressure. The residue was purified by column chromatography (petroleum ether/ethyl acetate = 50:1 to 10:1) on silica gel to afford **2**.

## VI. Synthetic Applications of 3-Chloro-2-Formylindoles

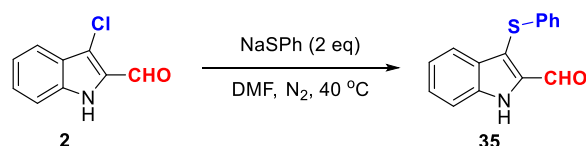

According to the literature,<sup>S16</sup> to a solution of **2** (35.9 mg, 0.2 mmol, 1.0 eq) in anhydrous DMF (1.0 mL) was added sodium thiophenolate (58.7 mg, 0.4 mmol, 2.0 eq) in one portion at room temperature. The mixture was stirred under an N<sub>2</sub> atmosphere for 43 h and then a saturated aqueous solution of NH<sub>4</sub>Cl (5.0 mL) was added. The mixture was extracted with EtOAc (10.0 mL) three times. The combined organic layers were dried over Na<sub>2</sub>SO<sub>4</sub>, filtered, and evaporated to dryness in vacuo. The residue was purified by column chromatography (petroleum ether/ethyl acetate = 50:1 to 10:1) on silica gel to afford **35** as a white solid (27.9 mg, 55% yield).

<sup>1</sup>H NMR (600 MHz, CDCl<sub>3</sub>) δ 10.22 (s, 1H), 9.73 (s, 1H), 7.68 (d, *J* = 8.1 Hz, 1H), 7.53 (d, *J* = 8.3 Hz, 1H), 7.44 (t, *J* = 7.6 Hz, 1H), 7.20 (dd, *J* = 11.1, 7.0 Hz, 5H), 7.14 (s, 1H).

<sup>13</sup>C NMR (150 MHz, CDCl<sub>3</sub>) δ 182.3, 137.6, 137.2, 136.8, 129.6, 129.2, 128.2, 127.4, 126.1, 122.2, 122.1, 116.0, 113.0.

HRMS-ESI *m/z*: [M+H]<sup>+</sup> Calcd for C<sub>15</sub>H<sub>12</sub>NOS 254.0634; Found 254.0640.

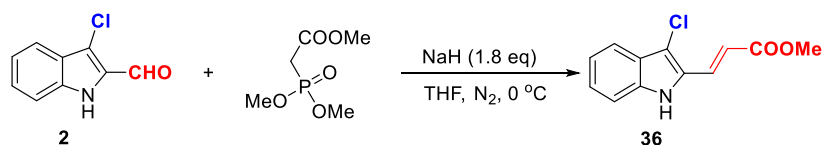

According to the literature,<sup>S17</sup> to a solution of 60 % sodium hydride (144 mg, 0.36 mmol, 1.8 eq) in 2 mL anhydrous THF, a solution of methyl 2-(dimethoxyphosphoryl)acetate (39.6 μL, 0.24 mmol, 1.2 eq) in THF was added at 0 °C under nitrogen atmosphere. After 20 minutes, **2** (35.9 mg, 0.2 mmol, 1 eq) was added to the flask. After 14 h, the



reaction was hydrolyzed by adding water. The mixture was extracted with ethyl acetate. The organic phase was washed with water and brine, dried over anhydrous Na<sub>2</sub>SO<sub>4</sub> and concentrated under reduced pressure. The residue was purified by column chromatography (petroleum ether/ethyl acetate = 50:1 to 10:1) on silica gel to afford **36** as a white solid (30.9 mg, 66% yield).

<sup>1</sup>H NMR (600 MHz, DMSO-*d*<sub>6</sub>) δ 11.94 (s, 1H), 7.64 (d, *J* = 16.0 Hz, 1H), 7.53 (d, *J* = 8.0 Hz, 1H), 7.43 (d, *J* = 8.3 Hz, 1H), 7.31 (t, *J* = 7.6 Hz, 1H), 7.14 (t, *J* = 7.5 Hz, 1H), 6.66 (d, *J* = 16.0 Hz, 1H), 3.75 (s, 3H).

<sup>13</sup>C NMR (150 MHz, DMSO-*d*<sub>6</sub>) δ 166.4, 136.2, 129.9, 129.0, 125.5, 125.0, 120.7, 118.2, 116.8, 112.1, 109.1, 51.7.

HRMS-ESI *m/z*: [M+H]<sup>+</sup> Calcd for C<sub>12</sub>H<sub>11</sub>ClNO<sub>2</sub> 236.0473; Found 236.0465.

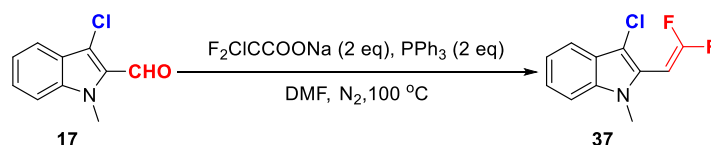

According to the literature,<sup>S18</sup> a solution of **17** (38.7 mg, 0.2 mmol, 1.0 eq) and PPh<sub>3</sub> (107.1 mg, 0.4 mmol, 2.0 eq) in DMF (1 mL) was heated to 100 °C. To the reaction mixture at 100 °C was added F<sub>2</sub>ClCCOONa (63.5 mg, 0.4 mmol, 2.0 eq) slowly. After the reaction finished according to the TLC (about 3 min), the reaction mixture was cooled to room temperature, quenched with water and extracted with ethyl acetate. The combined organic layers were washed with H<sub>2</sub>O<sub>2</sub> (30 wt% in water, 5 mL), brine and dried over Na<sub>2</sub>SO<sub>4</sub>. After the solvent was removed under reduced pressure, the residue was purified by column chromatography (petroleum ether/ethyl acetate = 80:1 to 20:1) on silica gel to afford **37** as a white oil (34.3 mg, 75% yield).

<sup>1</sup>H NMR (600 MHz, CDCl<sub>3</sub>) δ 7.63 (d, *J* = 7.9 Hz, 1H), 7.32 – 7.28 (m, 2H), 7.20 (ddd, *J* = 8.0, 5.7, 2.3 Hz, 1H), 5.35 (dd, *J* = 25.1, 1.3 Hz, 1H), 3.67 (d, *J* = 1.1 Hz, 3H).

<sup>13</sup>C NMR (150 MHz, CDCl<sub>3</sub>) δ 158.6, 156.7 (d, *J* = 7.1 Hz), 154.7, 136.4, 125.4, 123.2, 120.5, 118.3, 109.6, 71.0 (dd, *J* = 35.1, 18.0 Hz), 31.0 (d, *J* = 2.3 Hz).

<sup>19</sup>F NMR (565 MHz, CDCl<sub>3</sub>) δ -76.0 (dd, *J* = 25.0, 15.3 Hz), -80.3 (d, *J* = 15.3 Hz).

HRMS-ESI *m/z*: [M+K]<sup>+</sup> Calcd for C<sub>11</sub>H<sub>8</sub>ClF<sub>2</sub>NK 265.9945; Found 265.9950.

## VII. References

- S1. Reddy, V. P.; Bellew, D. R.; Prakash, G. K. S. A convenient preparation of sulfuryl chloride fluoride. *J. Fluorine Chem.* **1992**, *56*, 195–197.
- S2. Dobbs, A. One-Pot Construction of 3,3'-Bisindolylmethanes through Bartoli Indole Synthesis. *J. Org. Chem.* **2001**, *66*, 638–641.
- S3. Robinson, M. W.; Overmeyer, J. H.; Young, A. M.; Erhardt, P. W.; Maltese, W. A. Synthesis and Evaluation of Indole-Based Chalcones as Inducers of Methuosis, a Novel Type of Nonapoptotic Cell Death. *J. Med. Chem.* **2012**, *55*, 1940–1956.
- S4. Das, A.; Watanabe, K.; Morimoto, H.; Ohshima, T. Boronic Acid Accelerated Three-Component Reaction for the Synthesis of  $\alpha$ -Sulfanyl-Substituted Indole-3-acetic Acids. *Org. Lett.* **2017**, *19*, 5794–5797.
- S5. Mirskova, A. N.; Levkovskaya, G. G.; Kolesnikova, O. P.; Rudyakova, E. V.; Adamovich, S. V.; Bulletin, R. C. Directed synthesis and immunoactive properties of (2-hydroxyethyl)ammonium salts of 1-R-indol-3-ylsulfanyl(sulfonyl)alkanecarboxylic acids. *Russ. Chem. Bull.* **2010**, *59*, 2236–2246.
- S6. Bassaco, M.; Fortes, M.; Back, D.; Kaufman, T.; Silveira, C. An eco-friendly synthesis of novel 3,5-disubstituted-1,2-isoxazoles in PEG-400, employing the Et<sub>3</sub>N-promoted hydroamination of symmetric and unsymmetric 1,3-diyne-indole derivatives. *RSC Adv.* **2014**, *4*, 60785–60797.
- S7. Kaila, N.; Huang, A.; Moretto, A.; Follows, B.; Janz, K.; Lowe, M.; Thomason, J.; Mansour, T. S.; Hubeau, C.; Page, K.; Morgan, P.; Fish, S.; Xu, X.; Williams, C.; Saiah, E. Diazine Indole Acetic Acids as Potent, Selective, and Orally Bioavailable Antagonists of Chemoattractant Receptor Homologous Molecule Expressed on Th2 Cells (CRTH2) for the Treatment of Allergic Inflammatory Diseases. *J. Med. Chem.* **2012**, *55*, 5088–5109.
- S8. Wu, L.; Lu, K.; Packiarajan, M.; Jubian, V.; Chandrasena, G.; Wolinsky, T.; Walker, M. Indolyl and dihydroindolyl N-glycinamides as potent and in vivo active NPY5 antagonists. *Bioorg. Med. Chem. Lett.* **2012**, *22*, 2167–2171.
- S9. Ganesh, T.; Jiang, J.; Yang, M. S.; Dingleline, R. Lead optimization studies of cinnamic amide EP2 antagonists. *J. Med. Chem.* **2014**, *57*, 4173–4184.
- S10. Ramella, V.; He, Z.; Daniliuc, C. G.; Studer, A. Palladium-Catalyzed Diastereoselective Oxyarylation of 2-Alkylindoles. *Org. Lett.* **2015**, *17*, 664–667.
- S11. Yang, L.; Liu, Z.; Li, Y.; Lei, N.; Shen, Y.; Zheng, K. Electrochemically Enabled C3-Formylation and-Acylation of Indoles with Aldehydes. *Org. Lett.* **2019**, *21*, 7702–7707.
- S12. Jiang, X.; Yang, J.; Zhang, F.; Yu, P.; Yi, P.; Sun, Y.; Wang, Y. Facile Synthesis of 3-Halobenzo-heterocyclic-2-carbonyl Compounds via in situ Halogenation-Oxidation. *Adv. Synth. Catal.* **2016**, *358*, 2678–2683.
- S13. Li, Z.; Hu, Z.; Chen, R.; and Su, W. A Practical and Efficient Vilsmeier Synthesis of 3-Chloroindole-2-carboxaldehydes. *Org. Prep. Proced. Int.* **2010**, *42*, 479–484.
- S14. Ghandi, M.; Zarezadeh, N.; Taheri, A. A three-component, intramolecular Ugi reaction toward unique indoloketopiperazines. *Tetrahedron Lett.* **2012**, *53*, 3353–

3356.

- S15. Yu, C.; E., R.; Zhang, X.-W.; Hu, W.-Q.; Bao, G.; Li, Y.; Liu, Y.; He, Z.; Li, J.; Ma, W.; Mou, L.-Y.; Wang, R.; Sun, W. NaClO-Mediated Cross Installation of Indoles and Azoles Benefits Anticancer Hit Discovery. *ChemMedChem*. **2023**, *18*, e202200651.
- S16. Li, B.; Bunescu, A.; Gaunt, M. Multicomponent synthesis of  $\alpha$ -chloro alkylboronic esters via visible-light-mediated dual catalysis. *Chem*. **2023**, *9*, 216–226.
- S17. Zheng, P.; Wu, S.; Mou, C.; Xue, W.; Jin, Z.; Chi, Y. R. Addition of a Carbene Catalyst to Indole Aryl Aldehyde Activates a Remote  $\delta$ -sp<sup>2</sup> Carbon for Protonation and Formal [4 + 2] Reaction. *Org. Lett.* **2019**, *21*, 5026–5029.
- S18. Zhou, L.; Zhu, C.; Loh, T.-P.; Feng, C. Rh-Catalyzed C–H bond alkylation of indoles with  $\alpha,\alpha$ -difluorovinyl tosylate via indolyl group migration. *Chem. Commun.* **2018**, *54*, 5618–5621.

## VIII. NMR Spectra

7.55  
7.54  
7.53  
7.33  
7.32  
7.31  
7.31  
7.26  
7.16  
7.16  
7.15  
7.15  
7.14  
7.14  
7.09  
7.09  
7.09  
7.08  
7.08  
7.07  
7.06  
7.06

4.01  
4.01  
4.00  
4.00

2.47  
2.46

1.23  
1.22  
1.22  
1.22  
1.21  
1.21  
1.21  
1.20  
0.56  
0.55  
0.37  
0.36

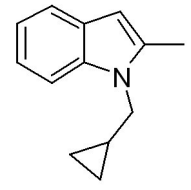

**1q**

|   | Parameter              | Value |
|---|------------------------|-------|
| 1 | Solvent                | CDC13 |
| 2 | Spectrometer Frequency | 600   |

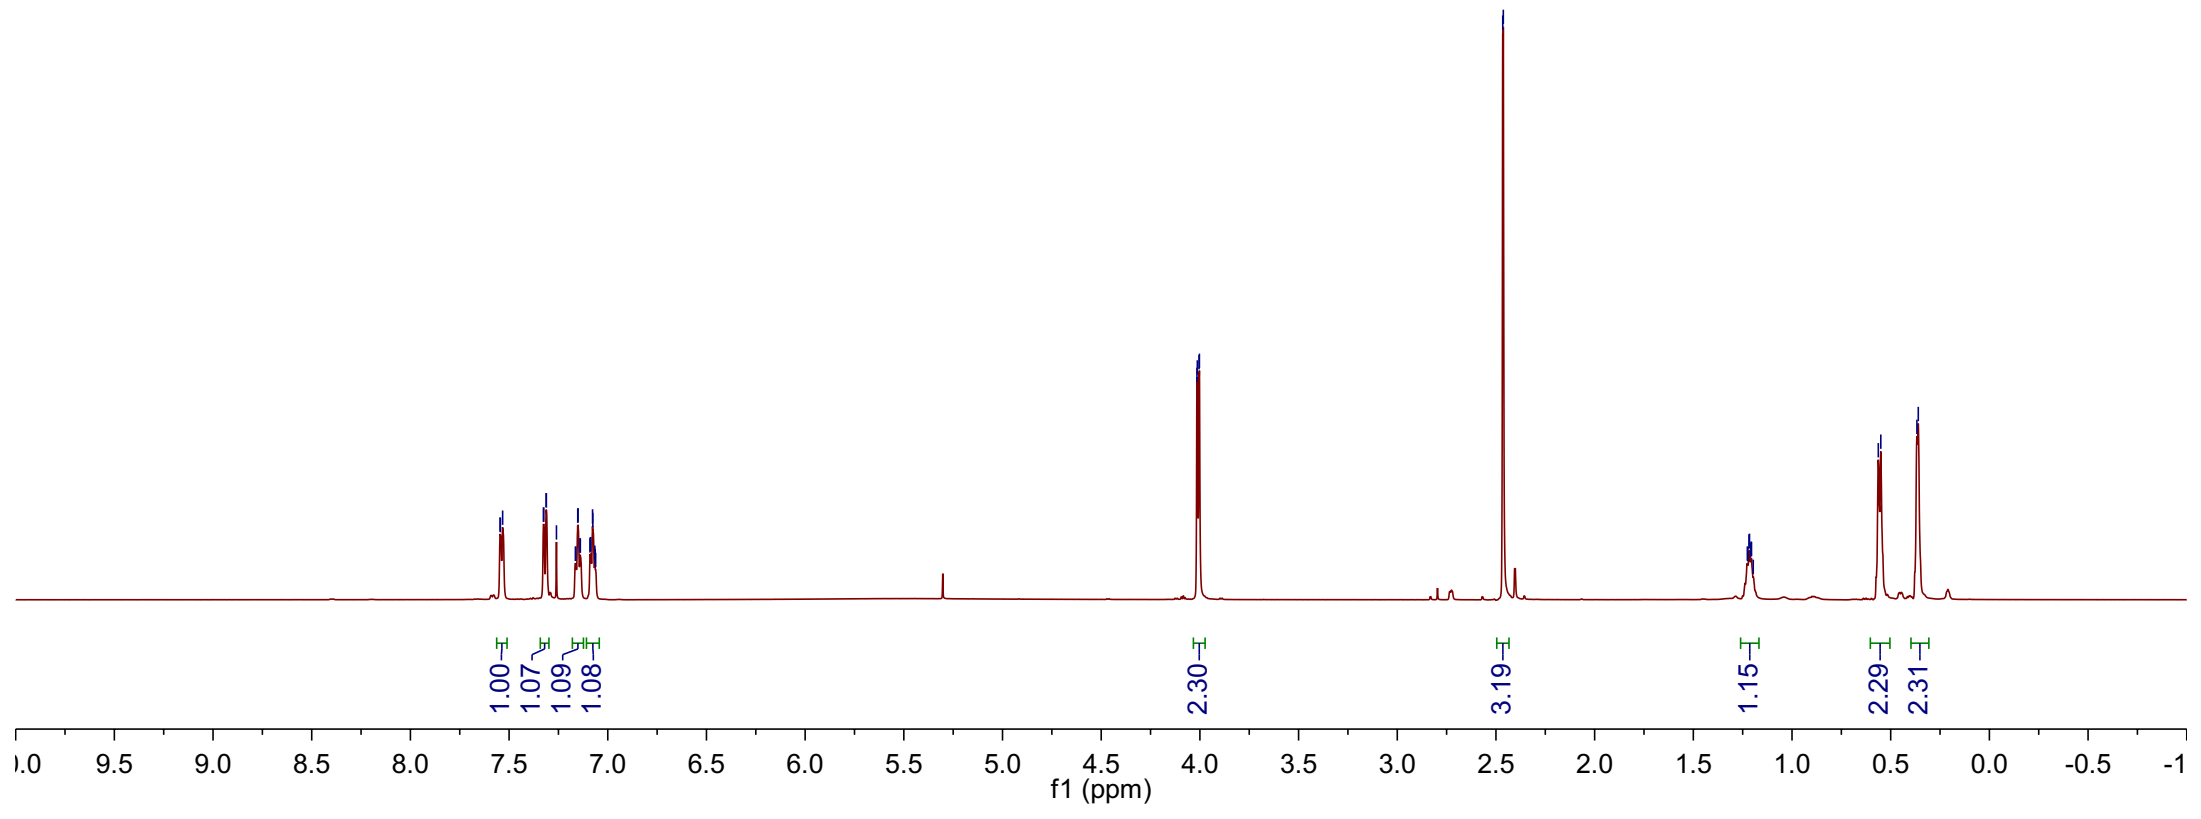

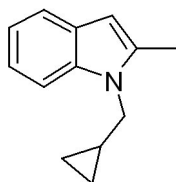

**1q**

137.09  
136.40  
128.16  
120.51  
119.76  
119.29  
109.31  
100.12  
77.16  
47.15  
13.15  
11.70  
4.04

|   | Parameter              | Value |
|---|------------------------|-------|
| 1 | Solvent                | CDC13 |
| 2 | Spectrometer Frequency | 150   |

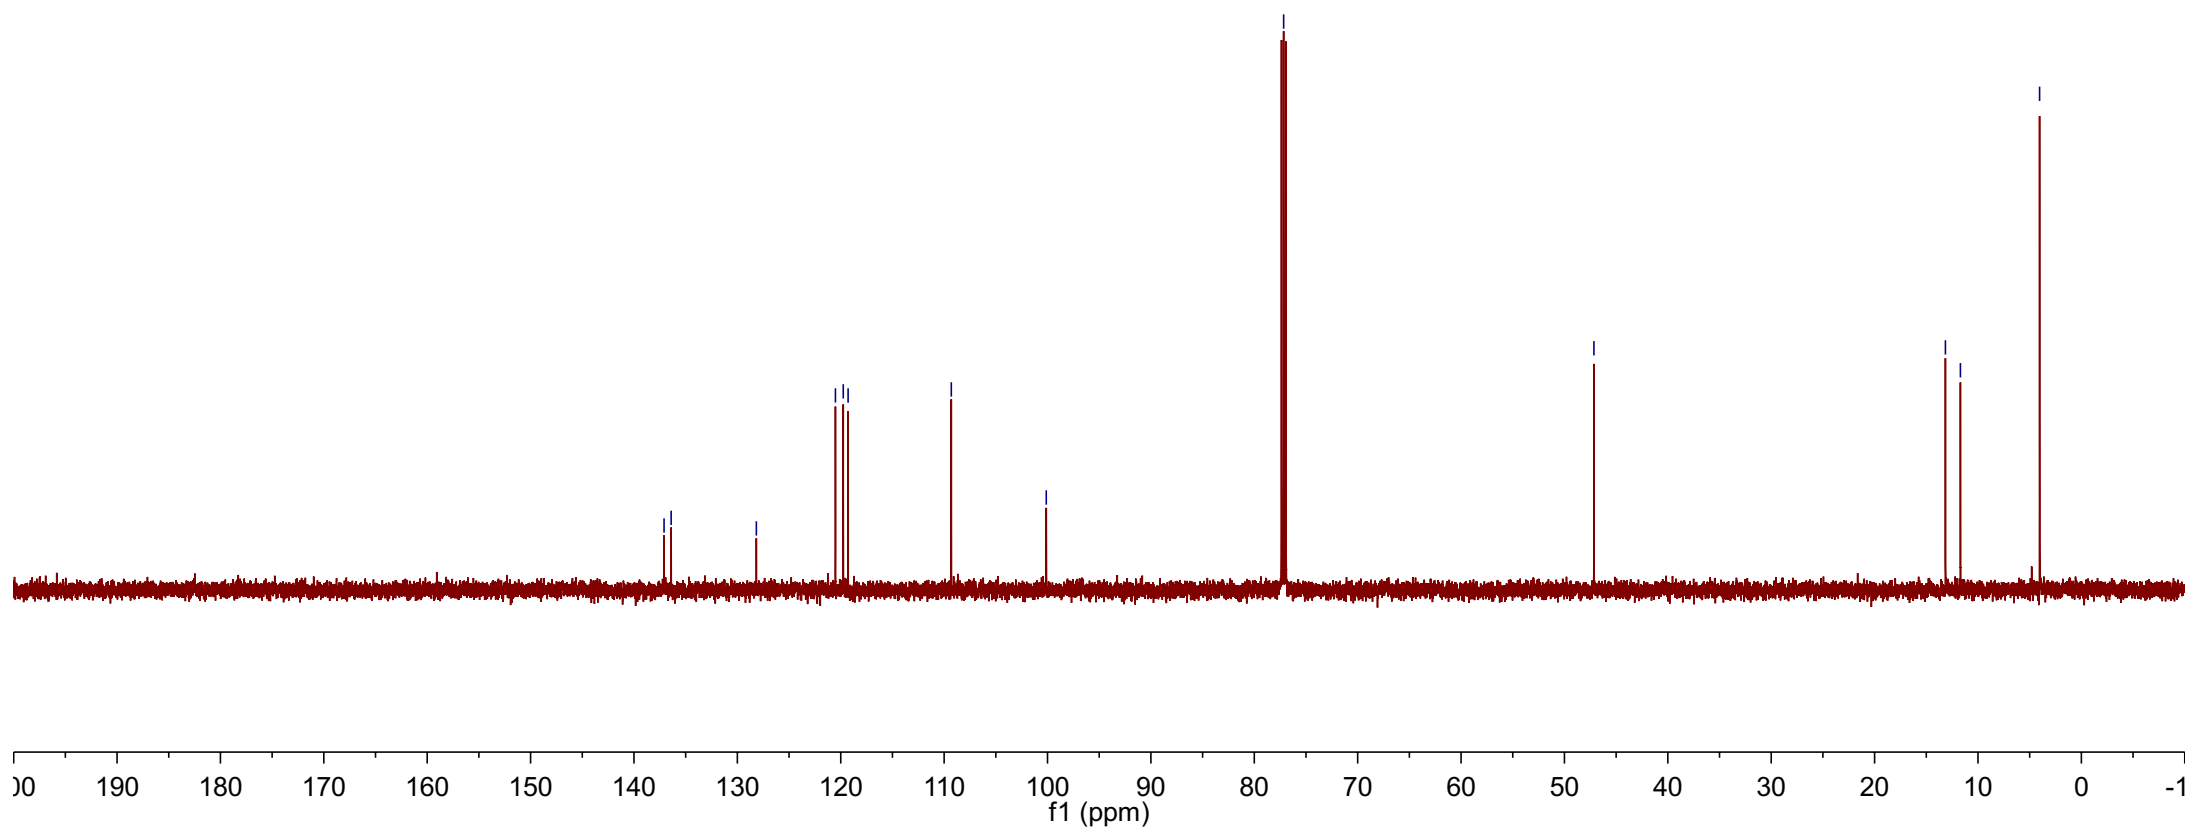

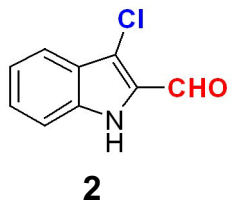

10.06  
9.65  
7.75  
7.75  
7.74  
7.74  
7.47  
7.46  
7.45  
7.45  
7.44  
7.44  
7.43  
7.43  
7.26  
7.25  
7.25  
7.24  
7.24  
7.24  
7.23  
7.22

|   | Parameter              | Value             |
|---|------------------------|-------------------|
| 1 | Solvent                | CDCl <sub>3</sub> |
| 2 | Spectrometer Frequency | 600               |

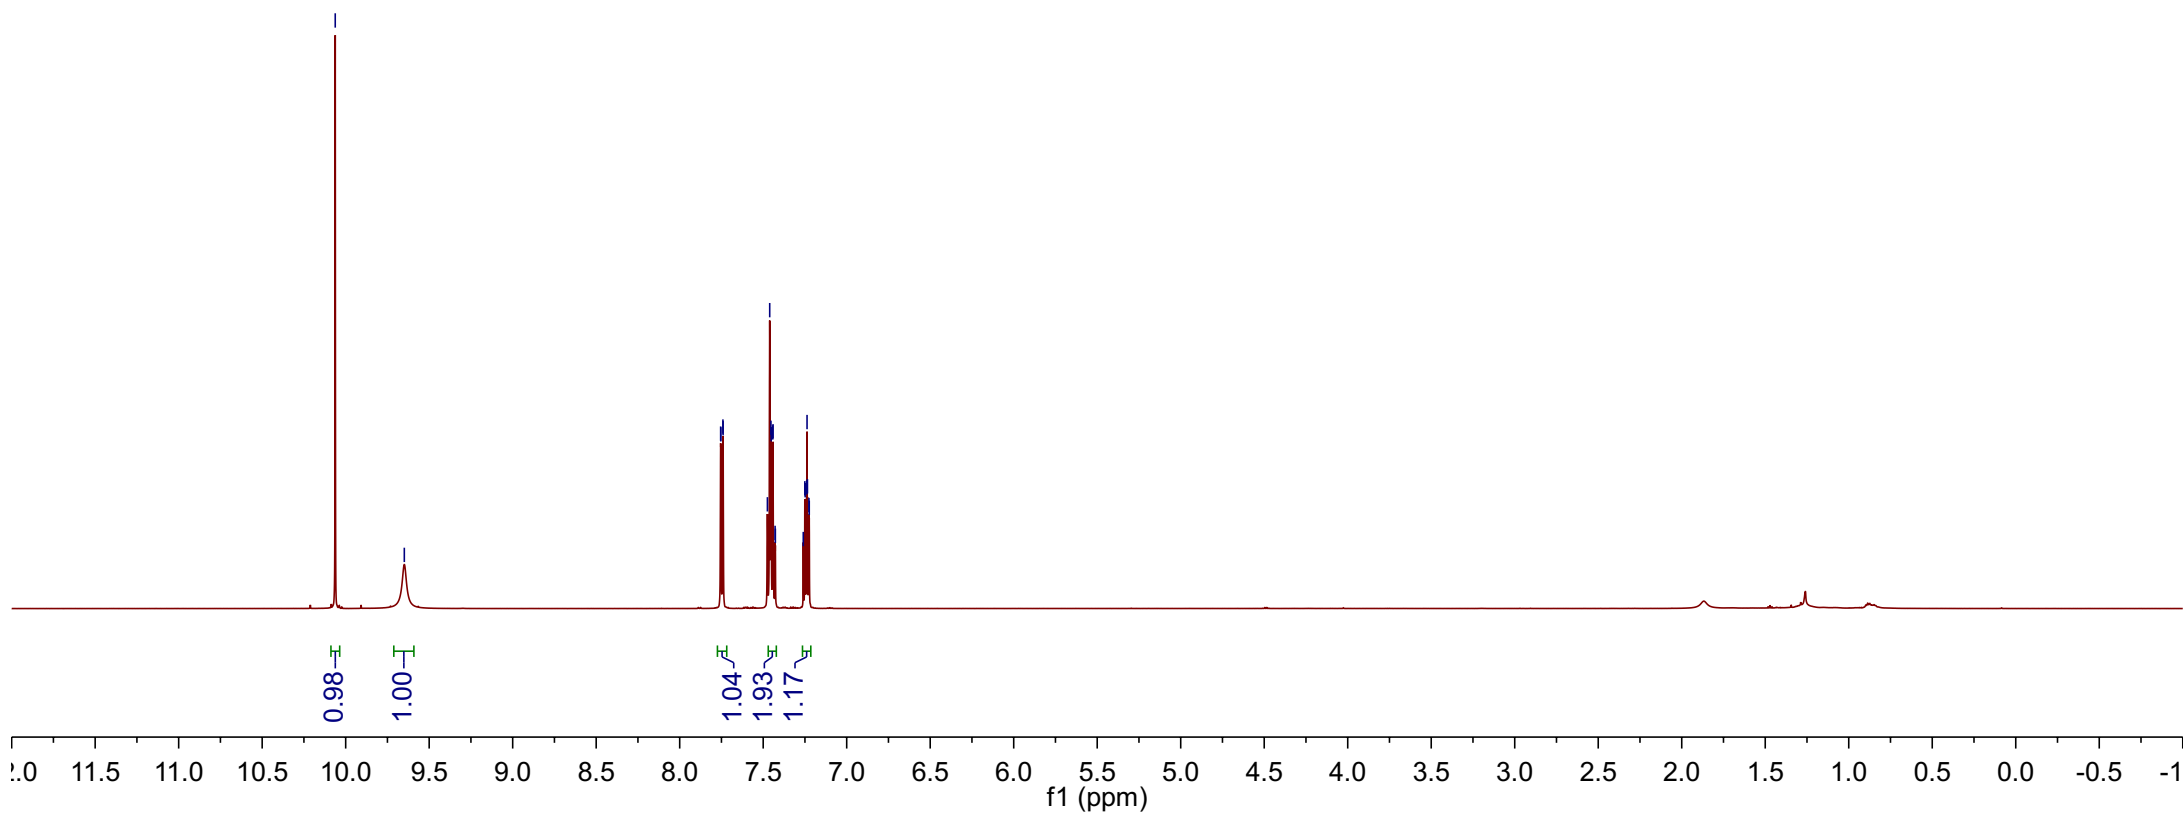

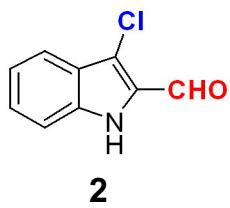

|   | Parameter              | Value |
|---|------------------------|-------|
| 1 | Solvent                | CDC13 |
| 2 | Spectrometer Frequency | 150   |

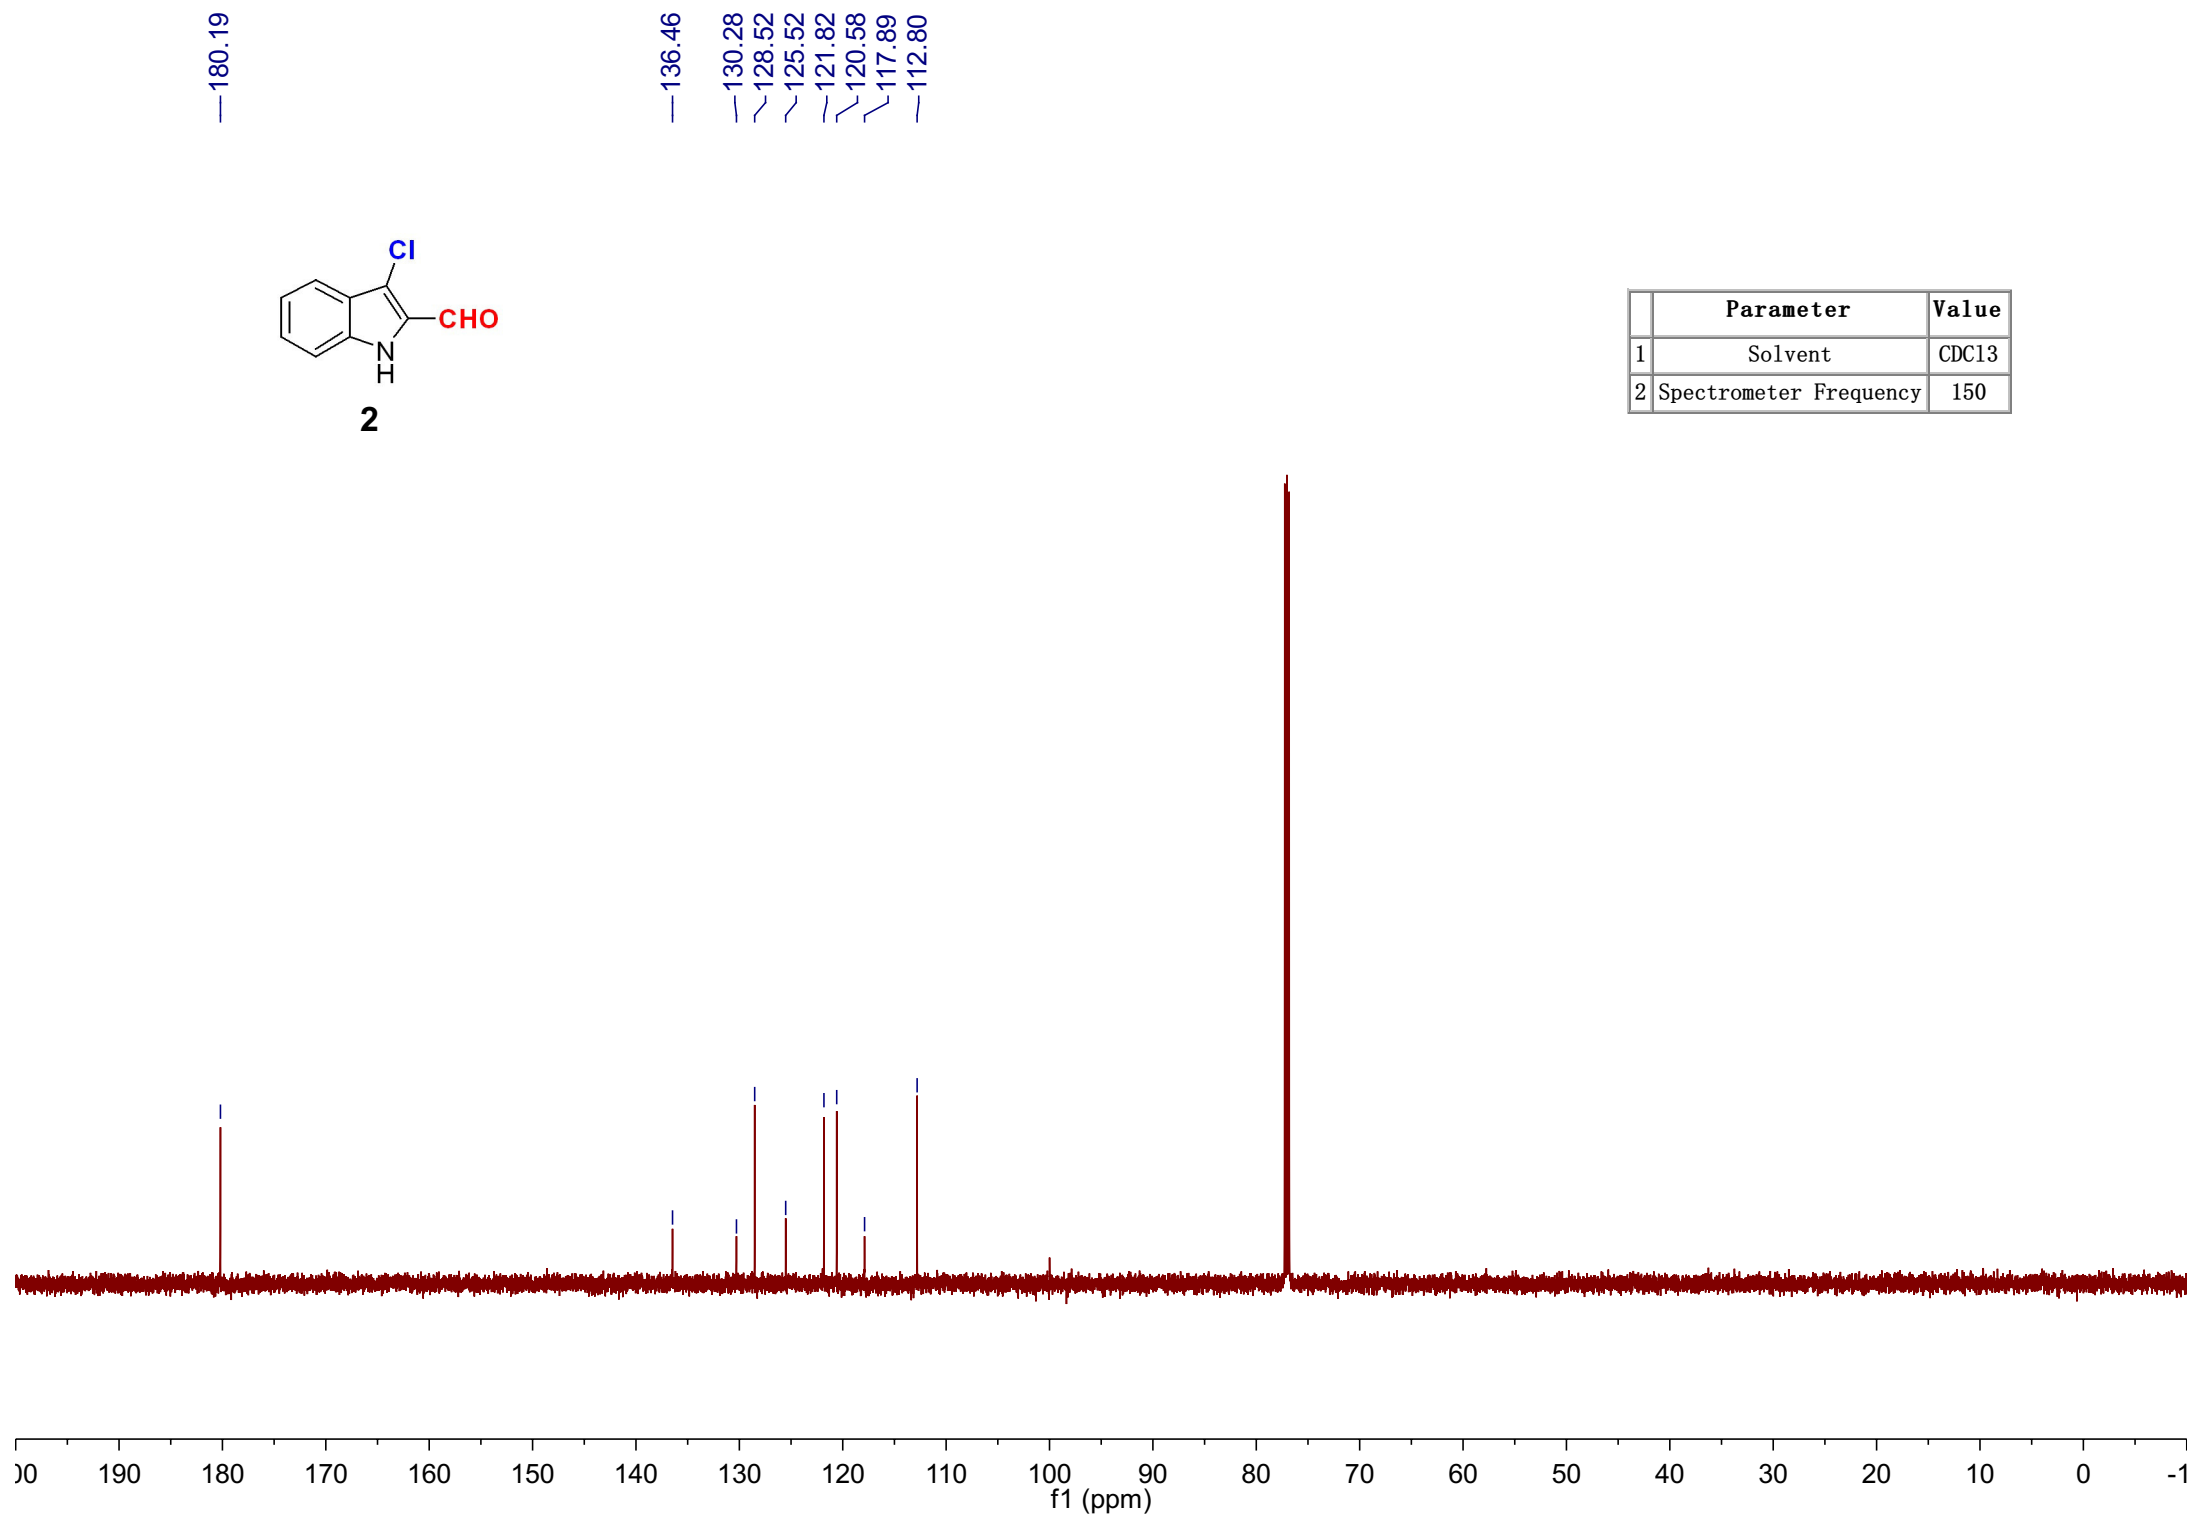

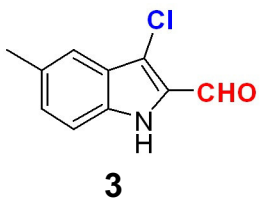

—10.03

—9.25

7.51

7.34

7.32

7.27

7.27

7.26

—2.47

|   | Parameter              | Value |
|---|------------------------|-------|
| 1 | Solvent                | CDC13 |
| 2 | Spectrometer Frequency | 600   |

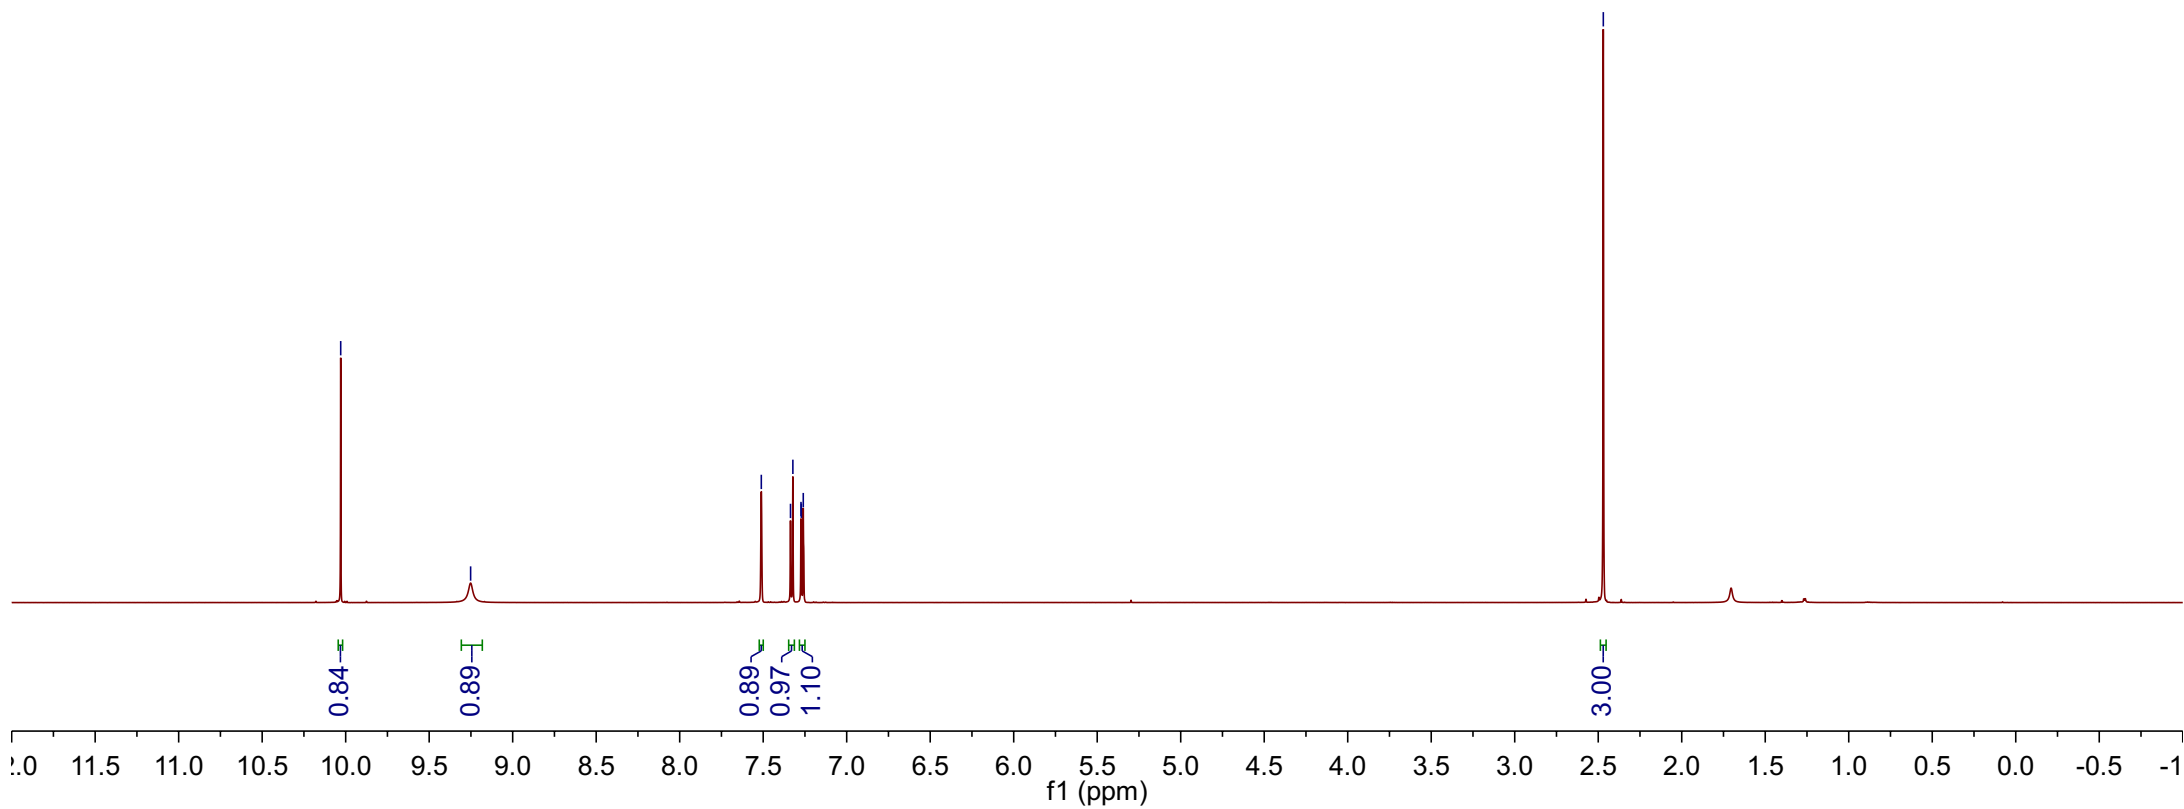



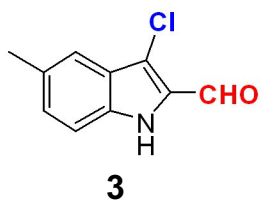

— 180.18

135.14

131.62

130.81

130.51

125.87

119.68

117.36

112.62

77.16

— 21.54

|   | Parameter              | Value |
|---|------------------------|-------|
| 1 | Solvent                | CDC13 |
| 2 | Spectrometer Frequency | 150   |

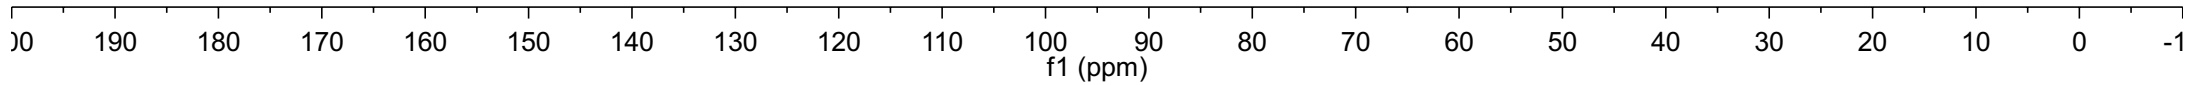

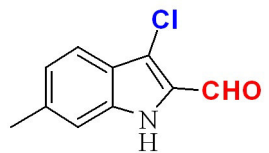

**4**

—10.01

—9.12

7.63  
7.61  
7.26  
7.26  
7.21  
7.08  
7.08  
7.06  
7.06

—2.49

|   | Parameter              | Value |
|---|------------------------|-------|
| 1 | Solvent                | CDC13 |
| 2 | Spectrometer Frequency | 600   |

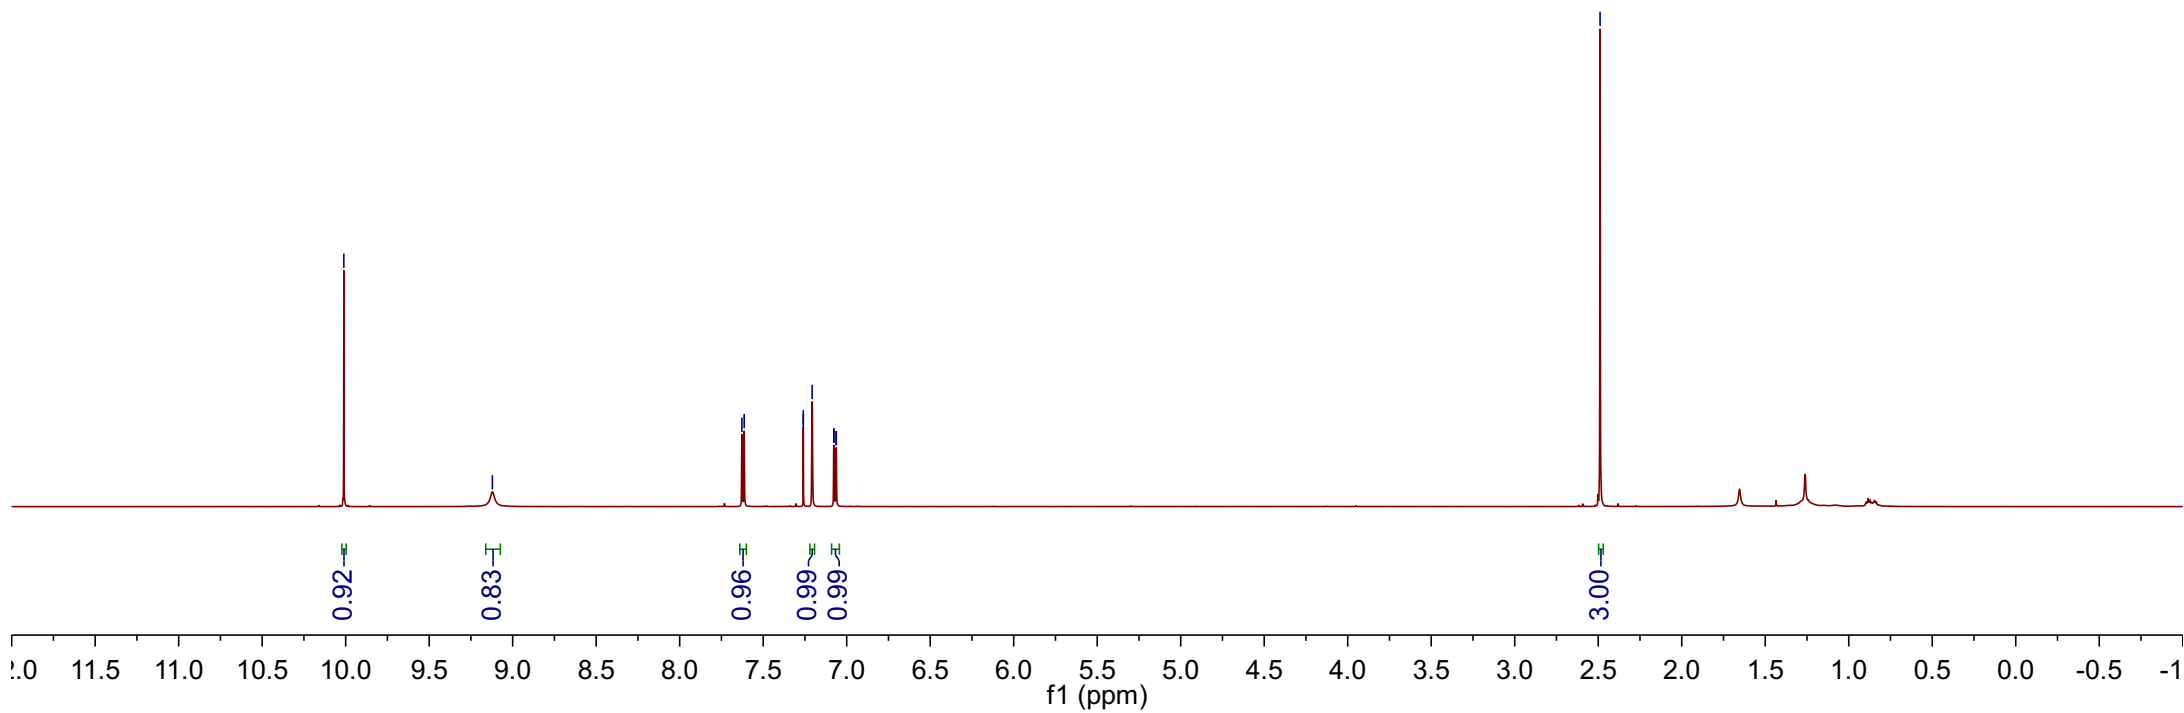



4

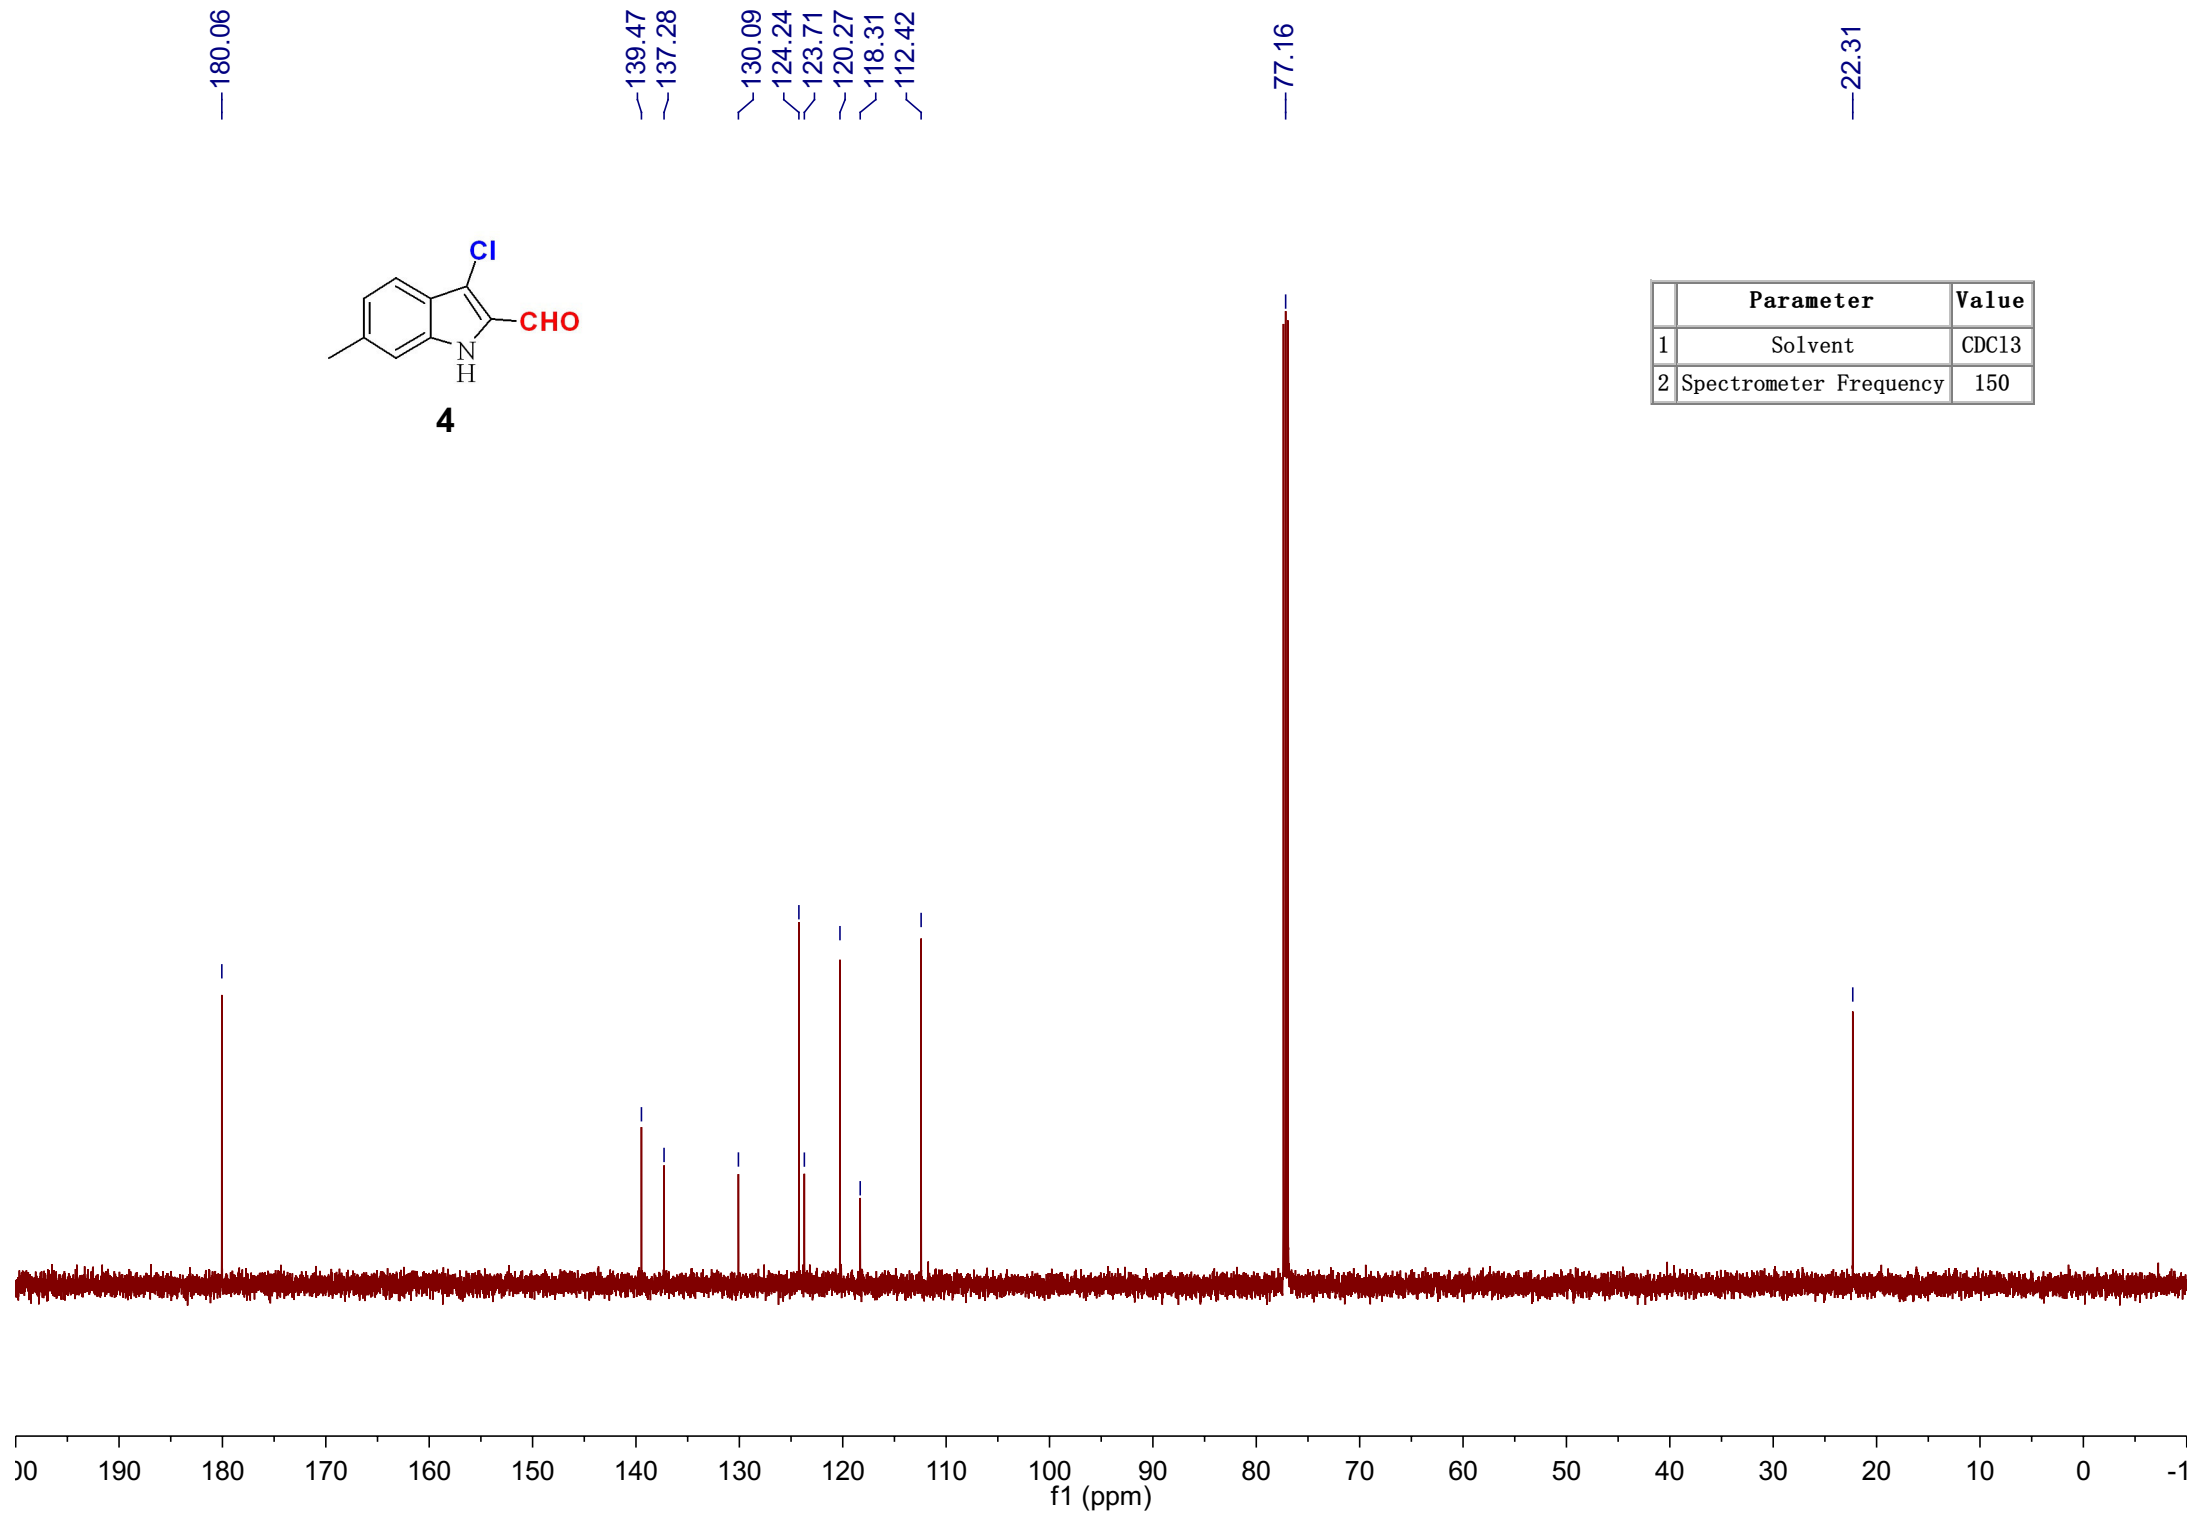

|   | Parameter              | Value |
|---|------------------------|-------|
| 1 | Solvent                | CDCl3 |
| 2 | Spectrometer Frequency | 150   |

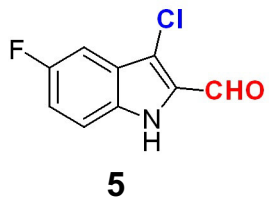

—12.38

—9.98

7.50  
7.49  
7.49  
7.48  
7.42  
7.41  
7.40  
7.40  
7.31  
7.30  
7.29  
7.29  
7.28  
7.27

—2.50

|   | Parameter              | Value |
|---|------------------------|-------|
| 1 | Solvent                | DMSO  |
| 2 | Spectrometer Frequency | 600   |

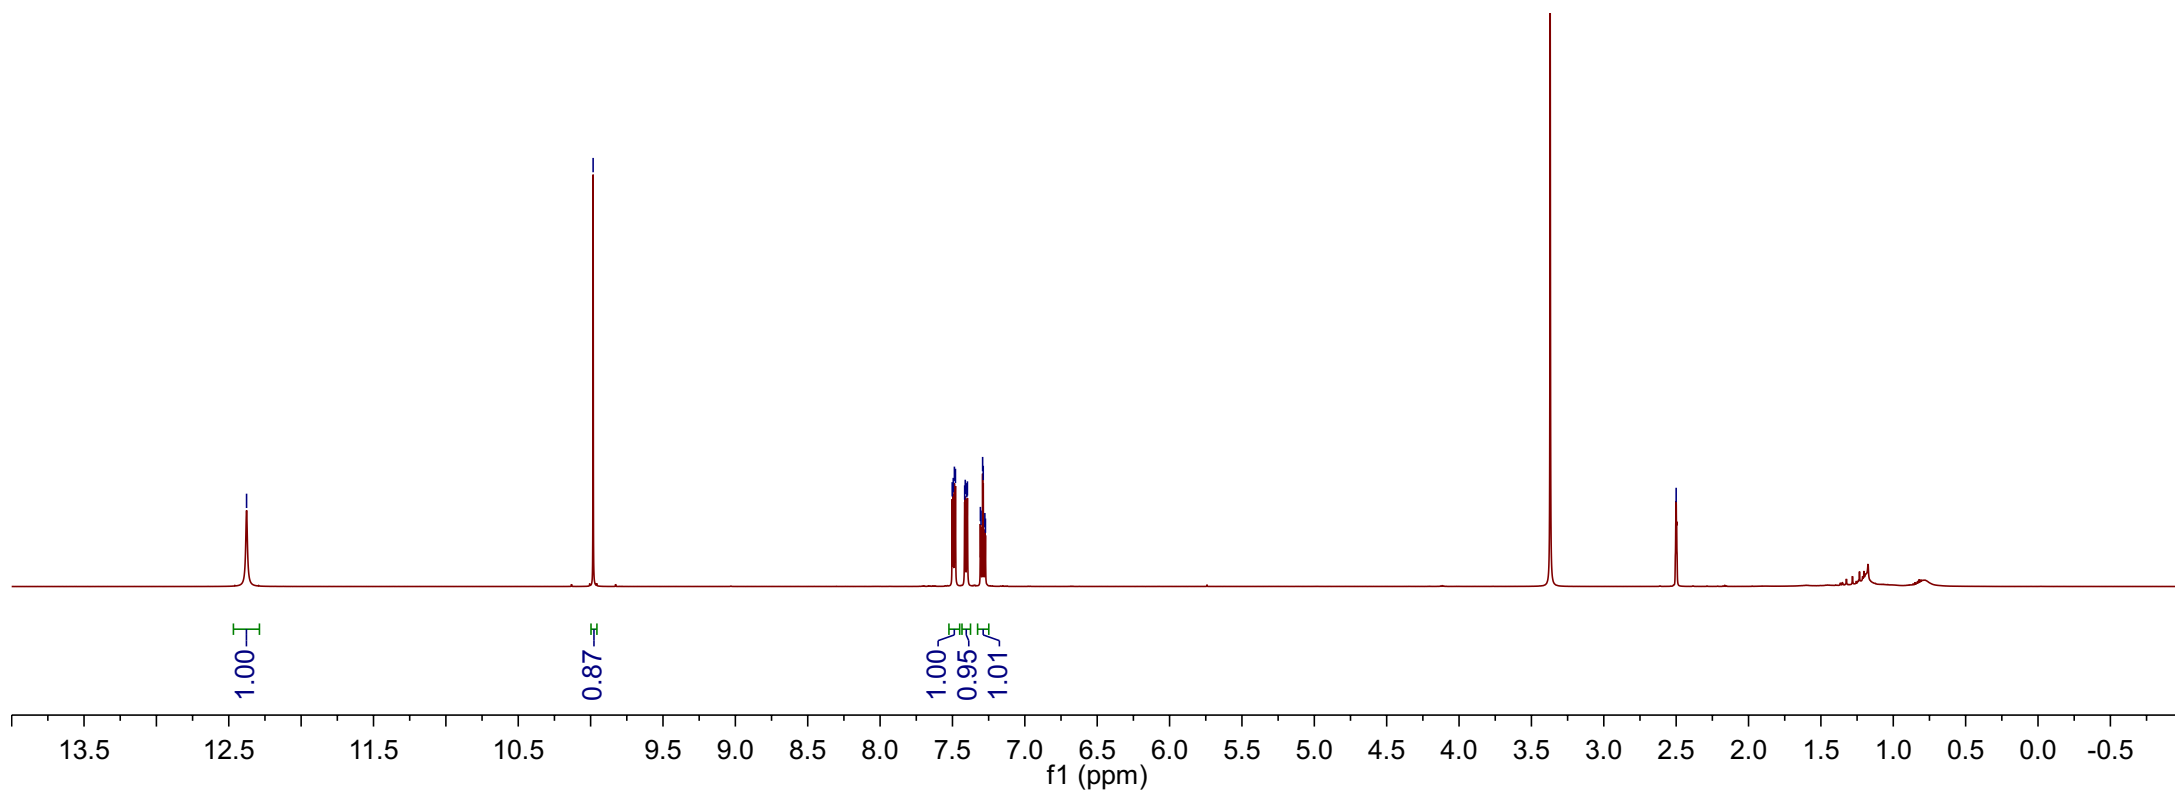

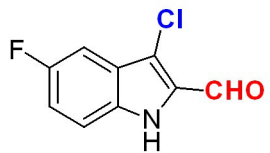

**5**

—180.79

—158.89

—157.32

—133.56

—132.02

—124.84

—124.77

—117.40

—117.22

—115.73

—115.67

—114.33

—104.83

—103.87

—39.52

|   | Parameter              | Value |
|---|------------------------|-------|
| 1 | Solvent                | DMSO  |
| 2 | Spectrometer Frequency | 150   |

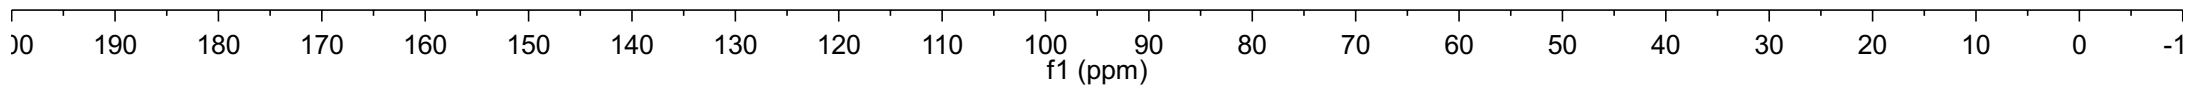

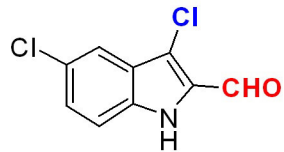

**6**

—12.46

—9.99

7.70  
7.69  
7.50  
7.48  
7.42  
7.41  
7.40  
7.40

—2.50

|   | Parameter              | Value |
|---|------------------------|-------|
| 1 | Solvent                | DMSO  |
| 2 | Spectrometer Frequency | 600   |

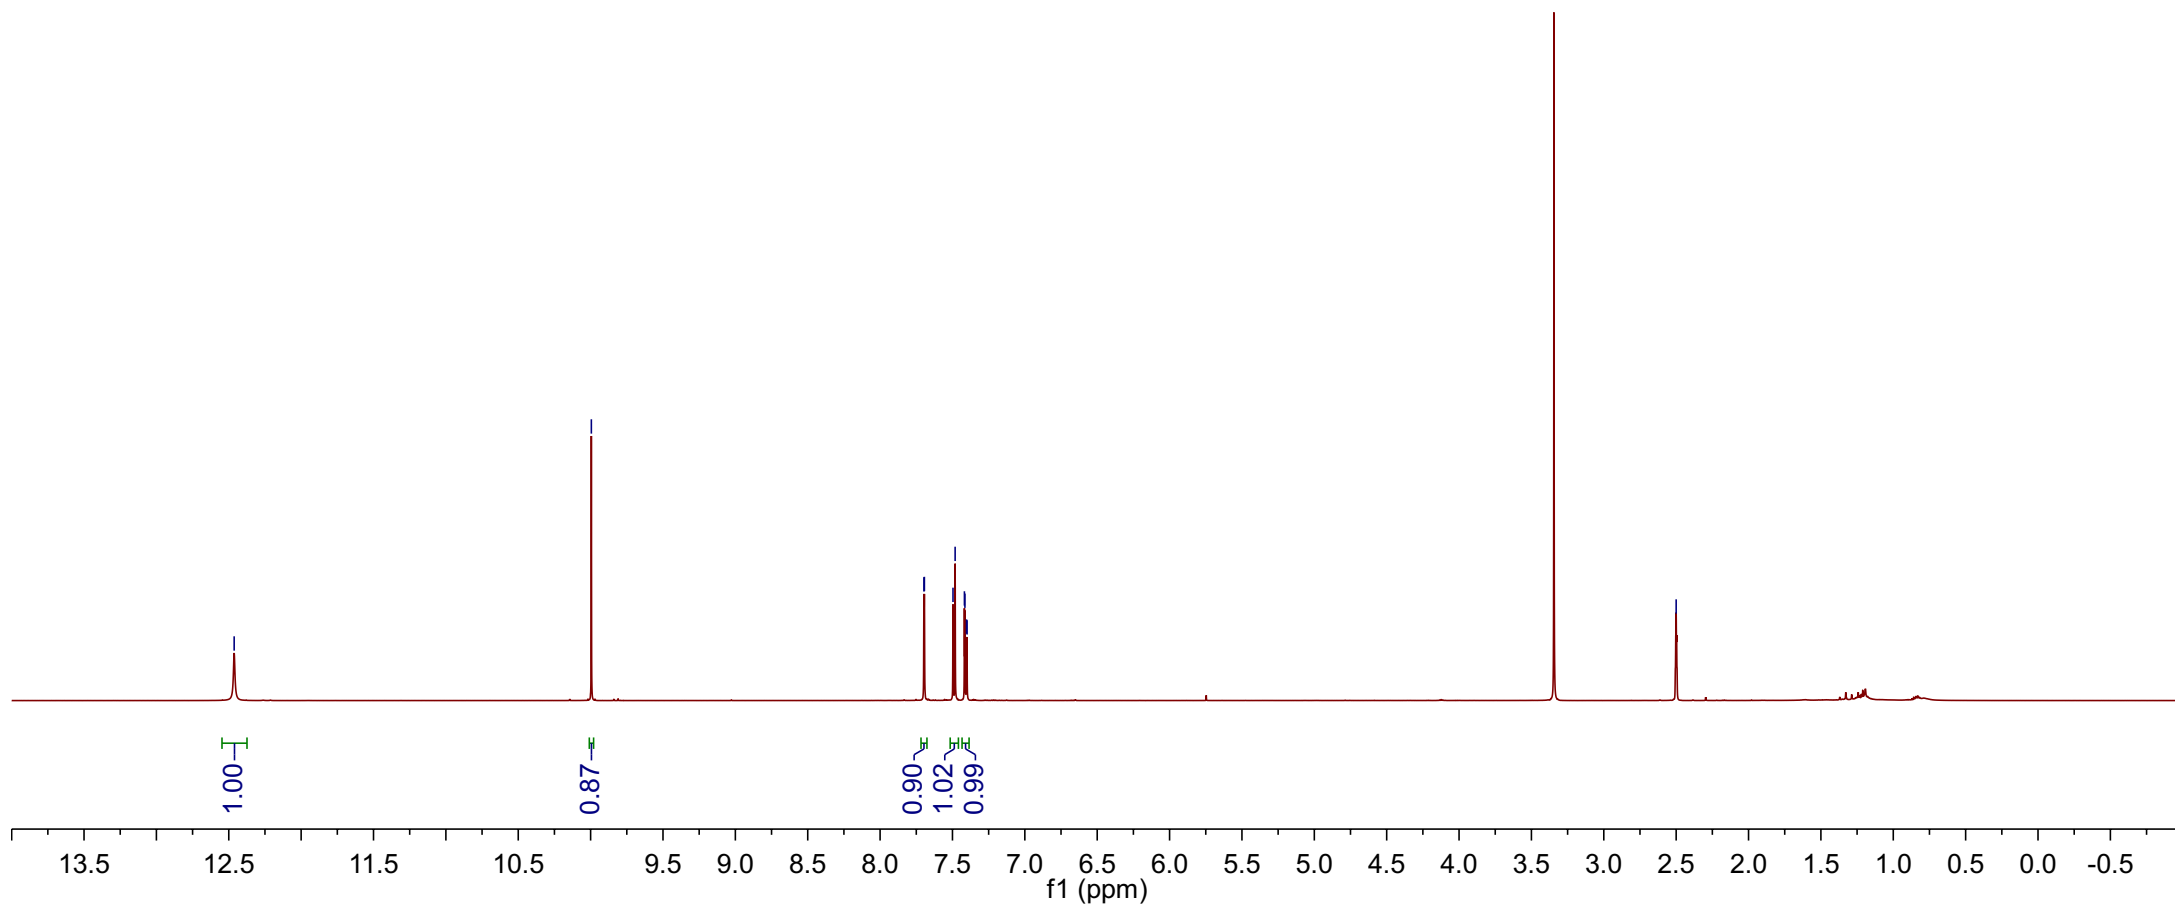

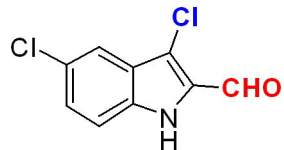

**6**

—180.51

134.82  
131.47  
127.81  
126.09  
125.25  
118.49  
115.38  
113.24

—39.52

|   | Parameter              | Value |
|---|------------------------|-------|
| 1 | Solvent                | DMSO  |
| 2 | Spectrometer Frequency | 150   |

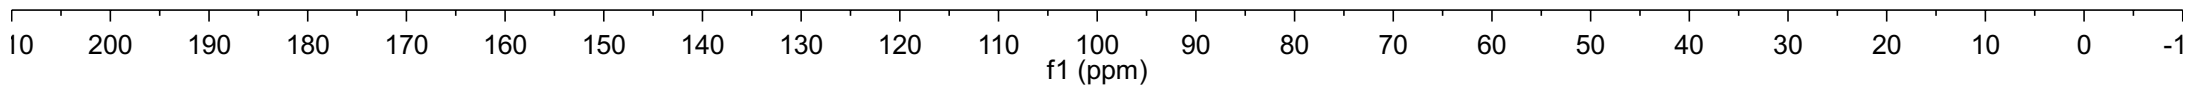

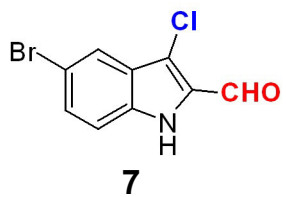

—12.47

—9.99

7.84  
7.53  
7.52  
7.51  
7.51  
7.44  
7.43

—2.50

|   | Parameter              | Value |
|---|------------------------|-------|
| 1 | Solvent                | DMSO  |
| 2 | Spectrometer Frequency | 600   |

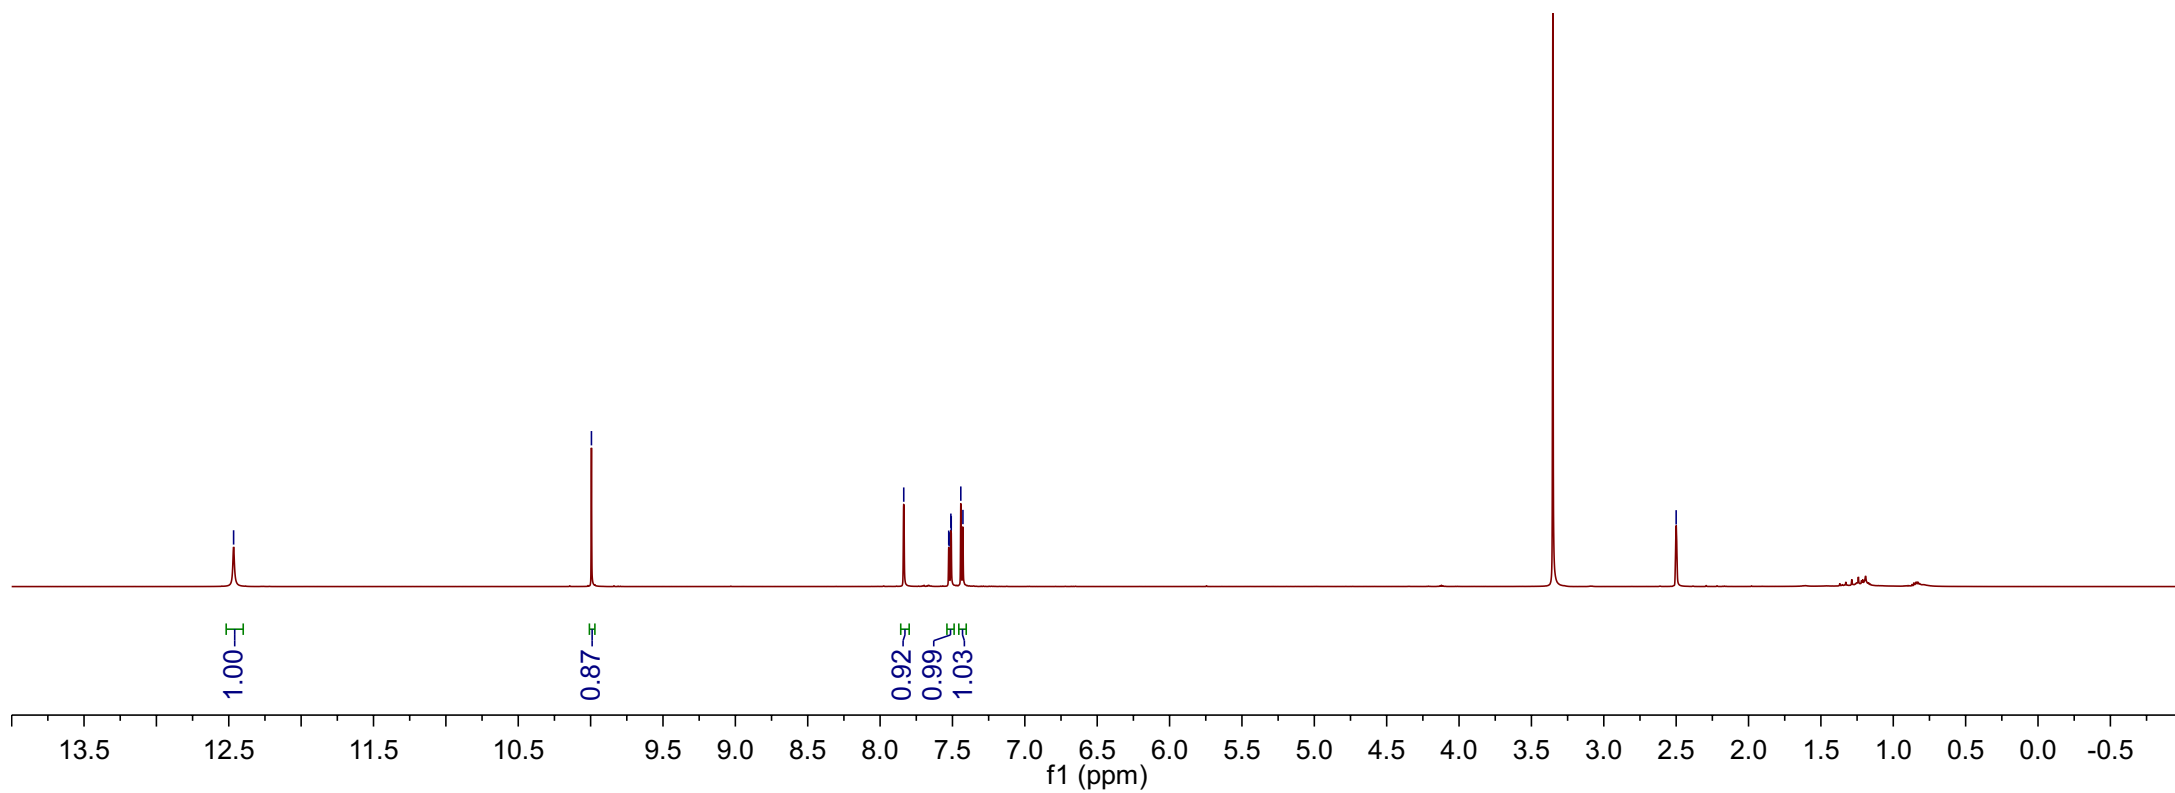



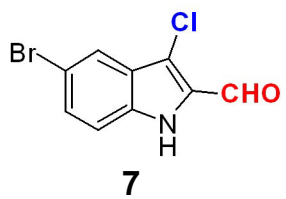

—180.50

—135.02  
—131.26  
—130.25  
—125.90  
—121.60  
—115.67  
—113.88  
—113.06

—39.52

|   | Parameter              | Value |
|---|------------------------|-------|
| 1 | Solvent                | DMSO  |
| 2 | Spectrometer Frequency | 150   |

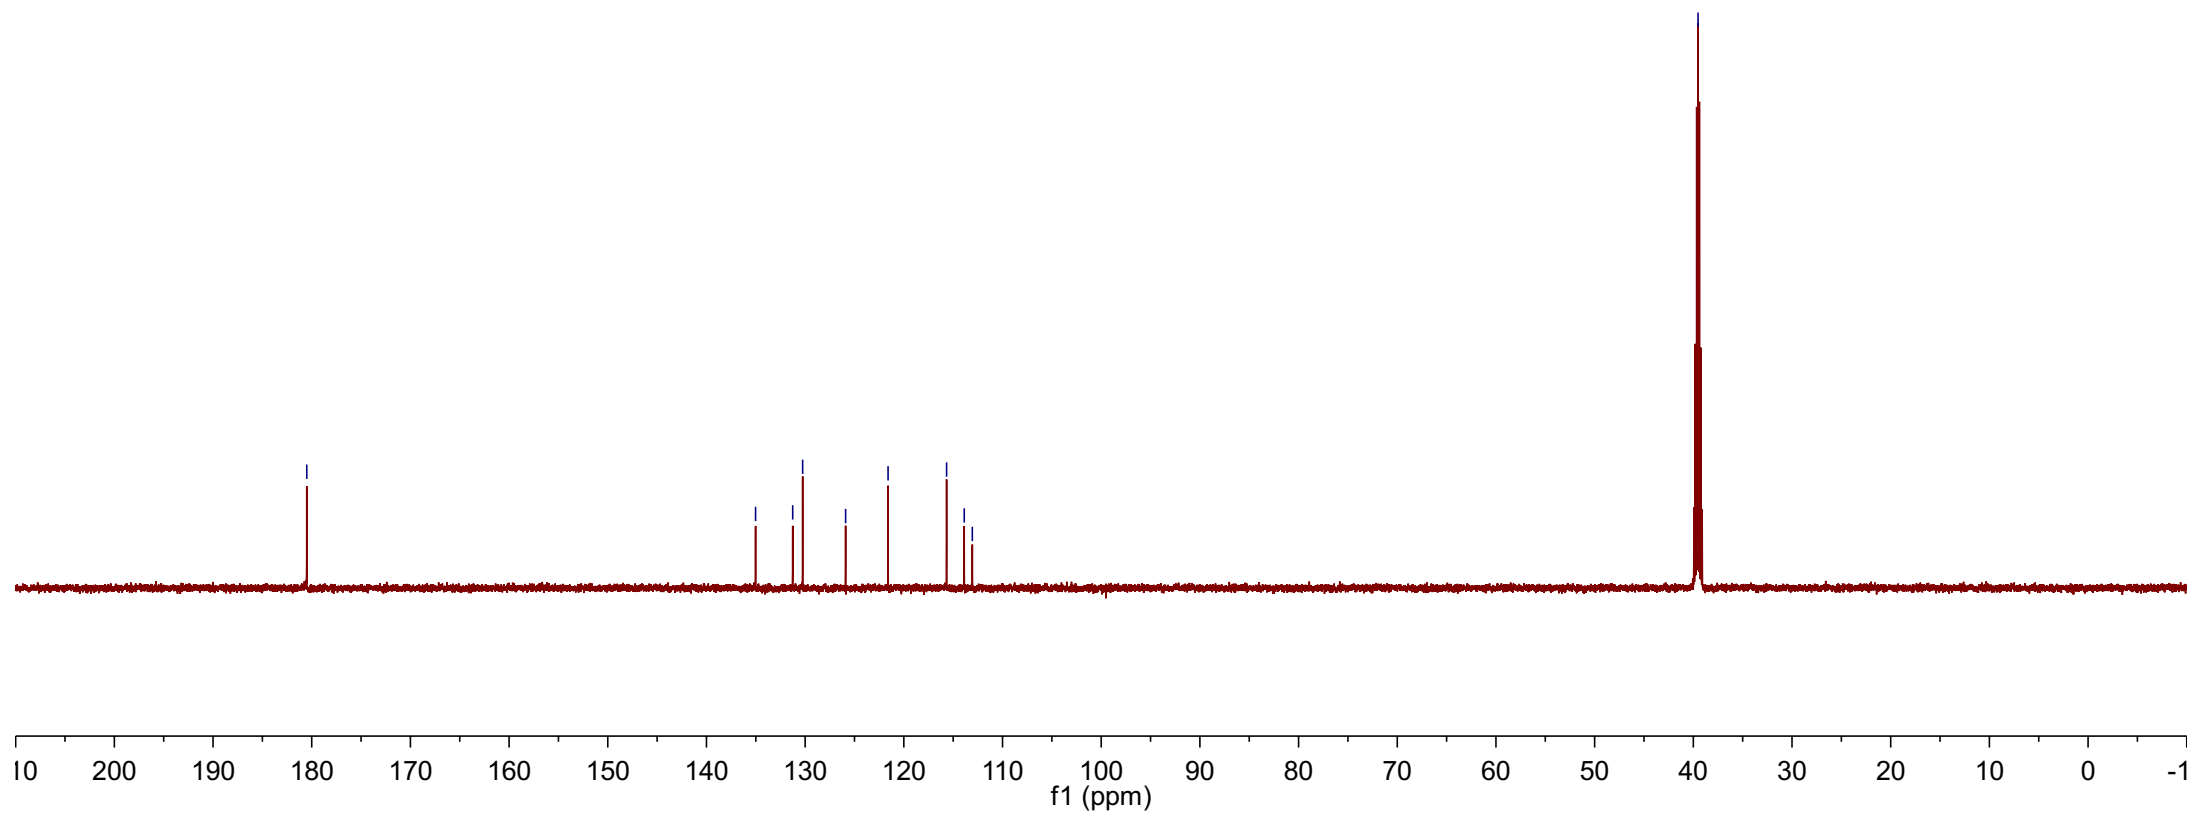

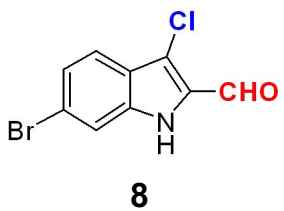

—12.39

—9.99

7.63  
7.62  
7.34  
7.34  
7.33  
7.32

—2.50

|   | Parameter              | Value |
|---|------------------------|-------|
| 1 | Solvent                | DMSO  |
| 2 | Spectrometer Frequency | 600   |

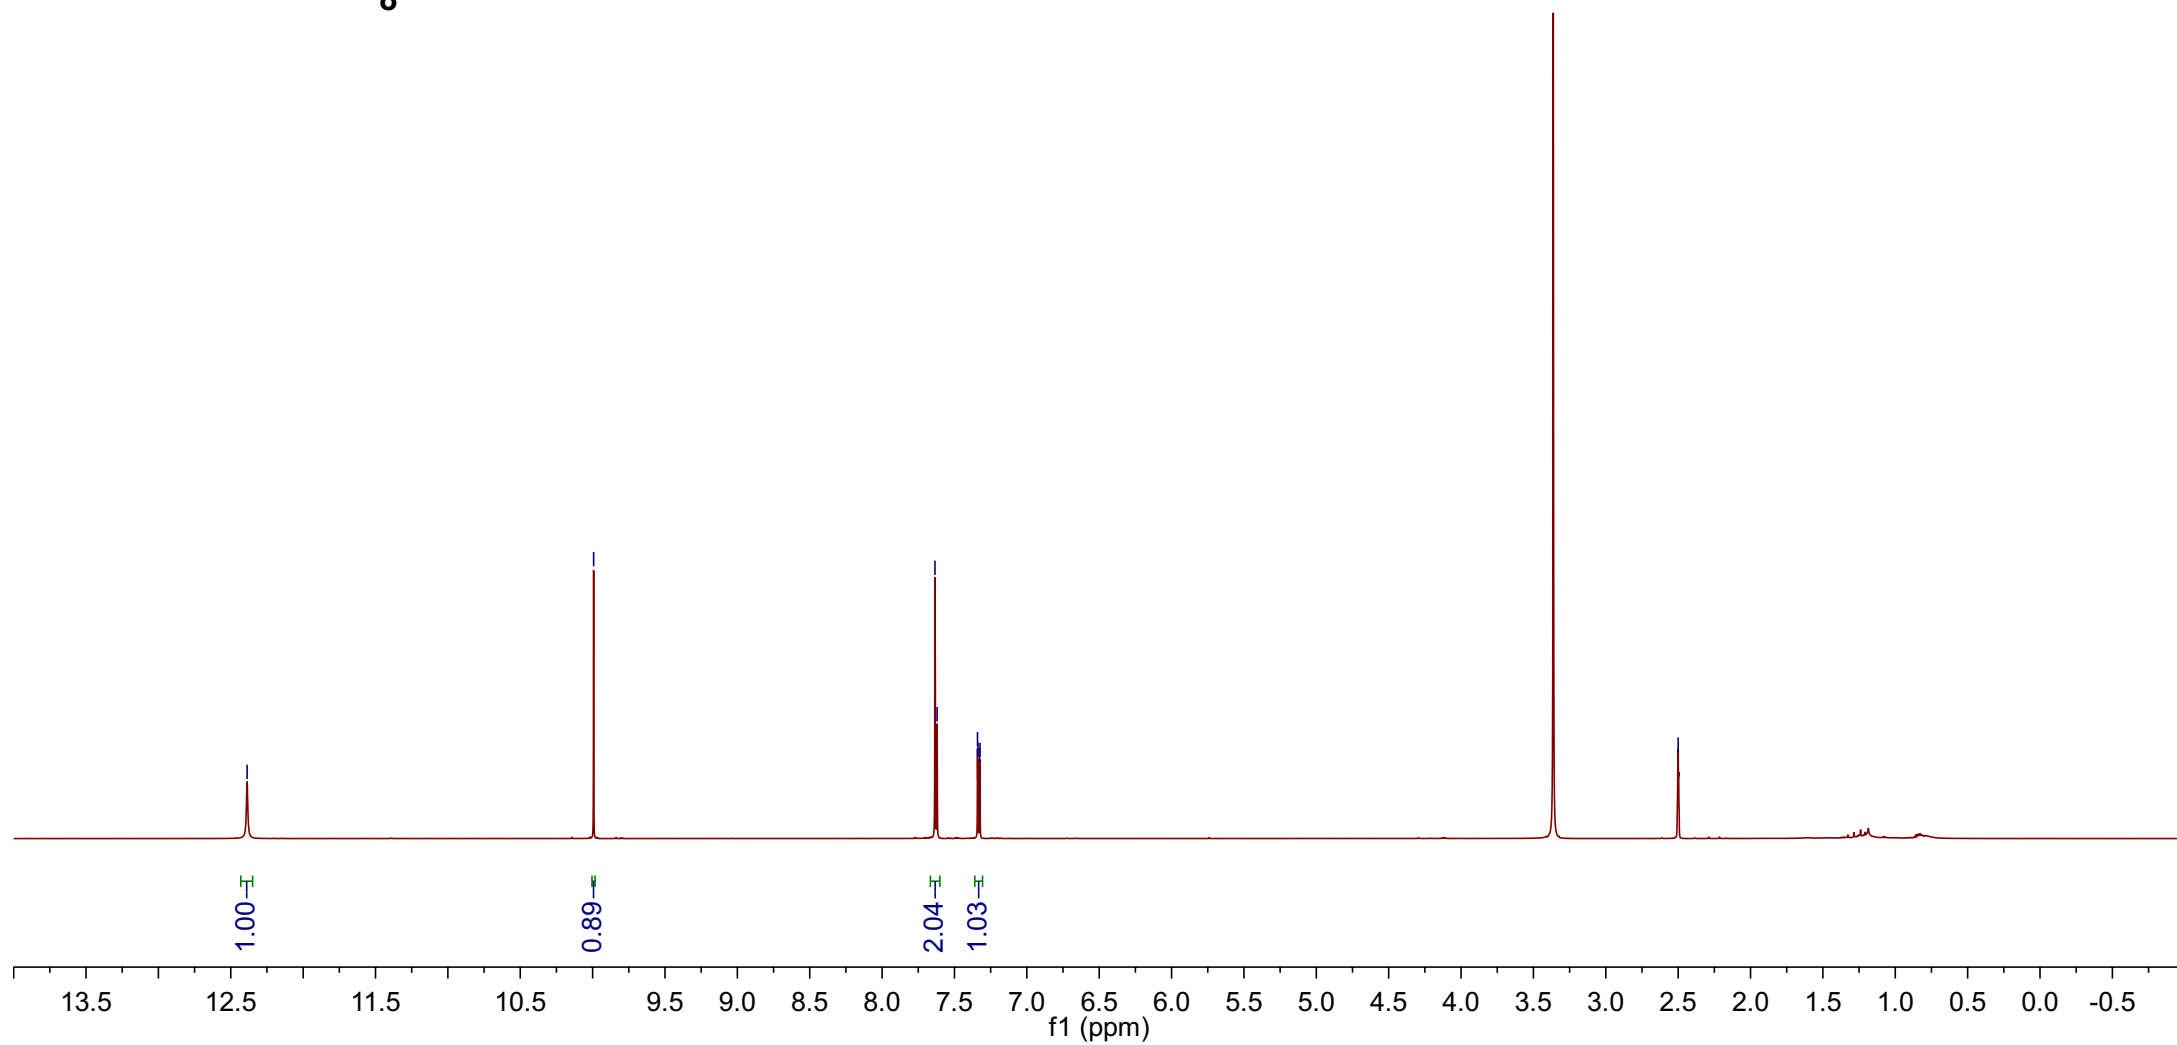

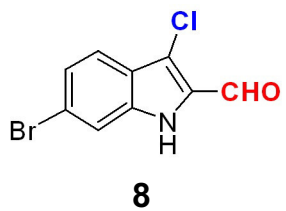

—180.43

—136.97

—130.94

124.67

123.41

121.51

120.45

115.85

114.39

—39.52

|   | Parameter              | Value |
|---|------------------------|-------|
| 1 | Solvent                | DMSO  |
| 2 | Spectrometer Frequency | 150   |



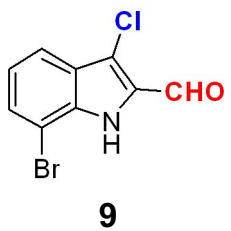

|   | Parameter              | Value |
|---|------------------------|-------|
| 1 | Solvent                | CDC13 |
| 2 | Spectrometer Frequency | 600   |

—10.05  
 —9.04  
 7.68  
 7.66  
 7.58  
 7.56  
 7.26  
 7.12  
 7.10  
 7.09

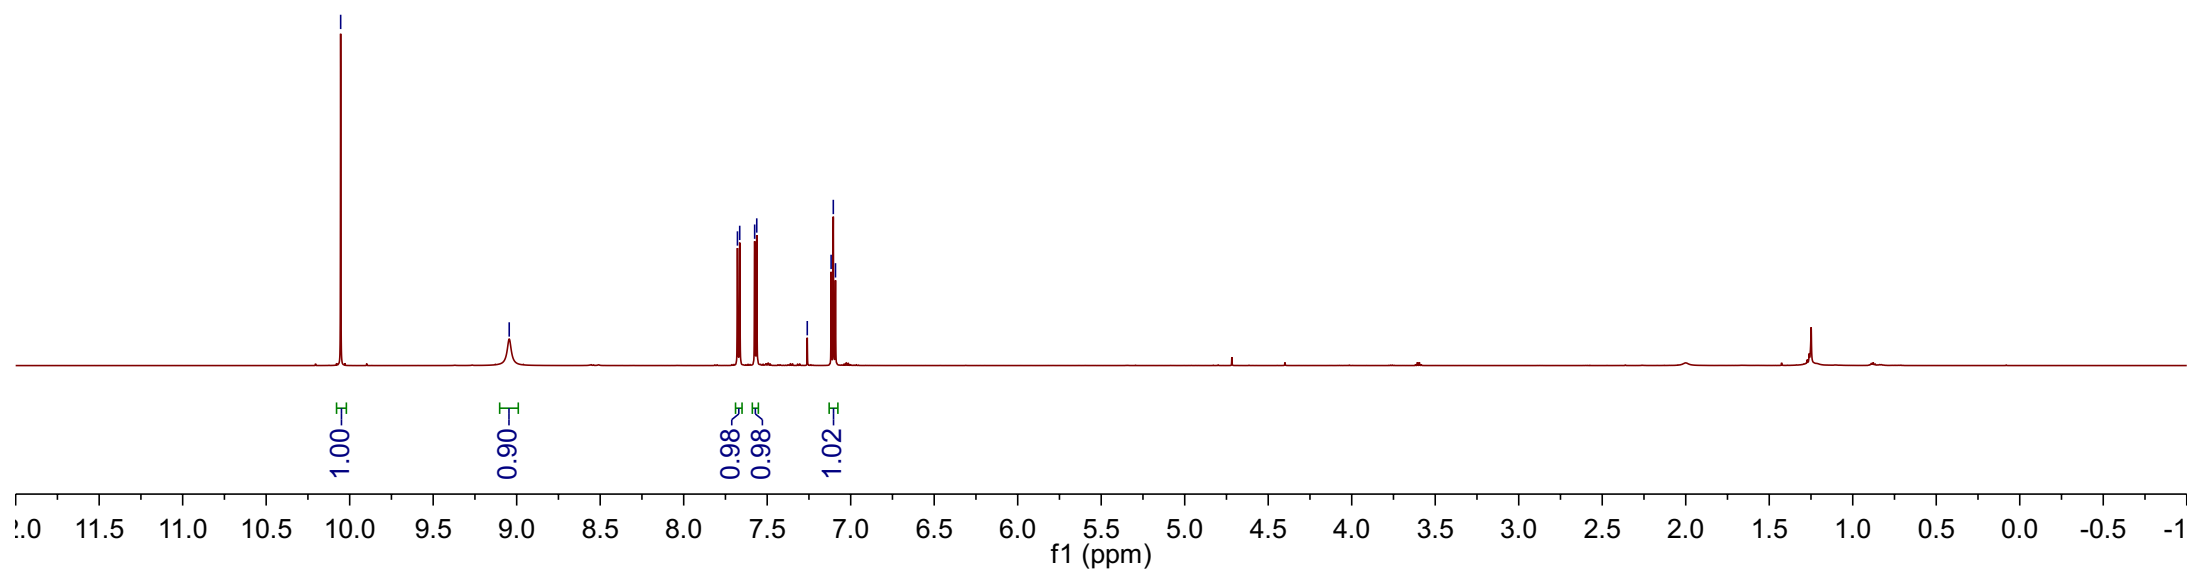

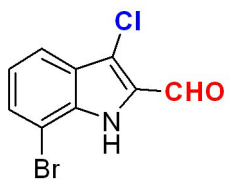

9

|   | Parameter              | Value |
|---|------------------------|-------|
| 1 | Solvent                | CDC13 |
| 2 | Spectrometer Frequency | 150   |

—179.90

—134.96  
—130.75  
—130.54  
—126.55  
—122.88  
—119.92  
—117.95

—106.05

—77.16

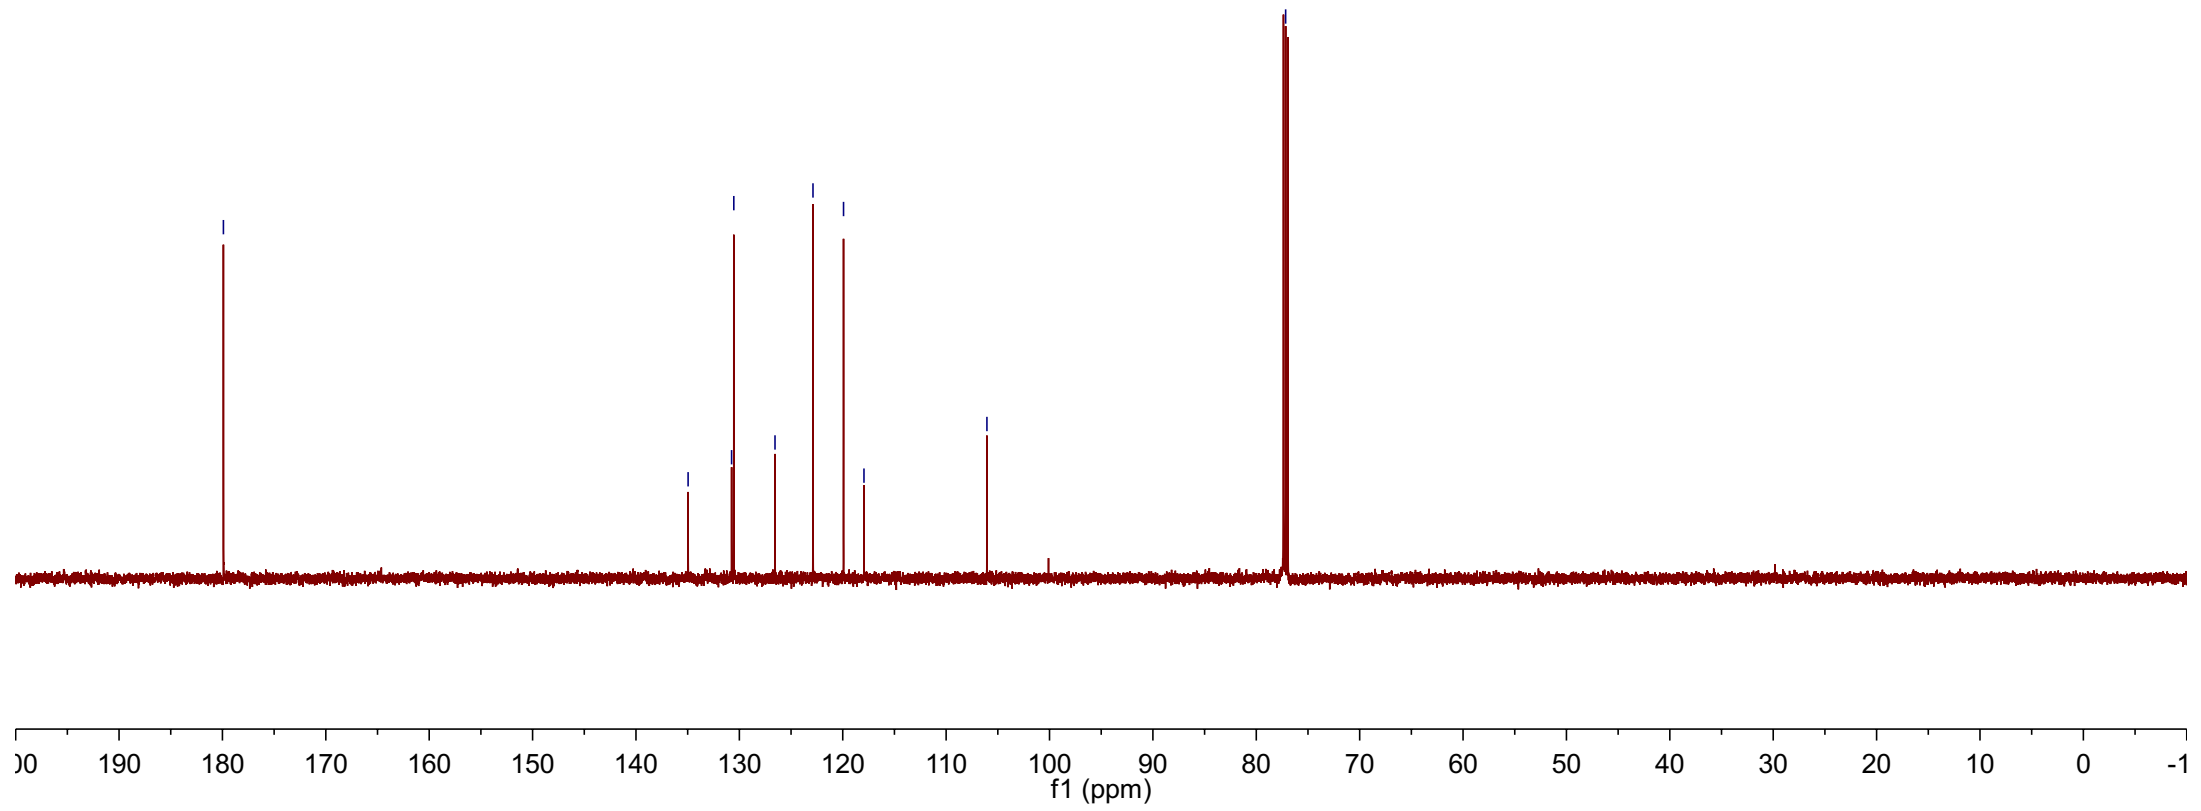

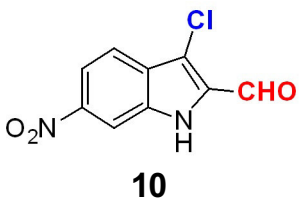

|   | Parameter              | Value |
|---|------------------------|-------|
| 1 | Solvent                | DMSO  |
| 2 | Spectrometer Frequency | 600   |

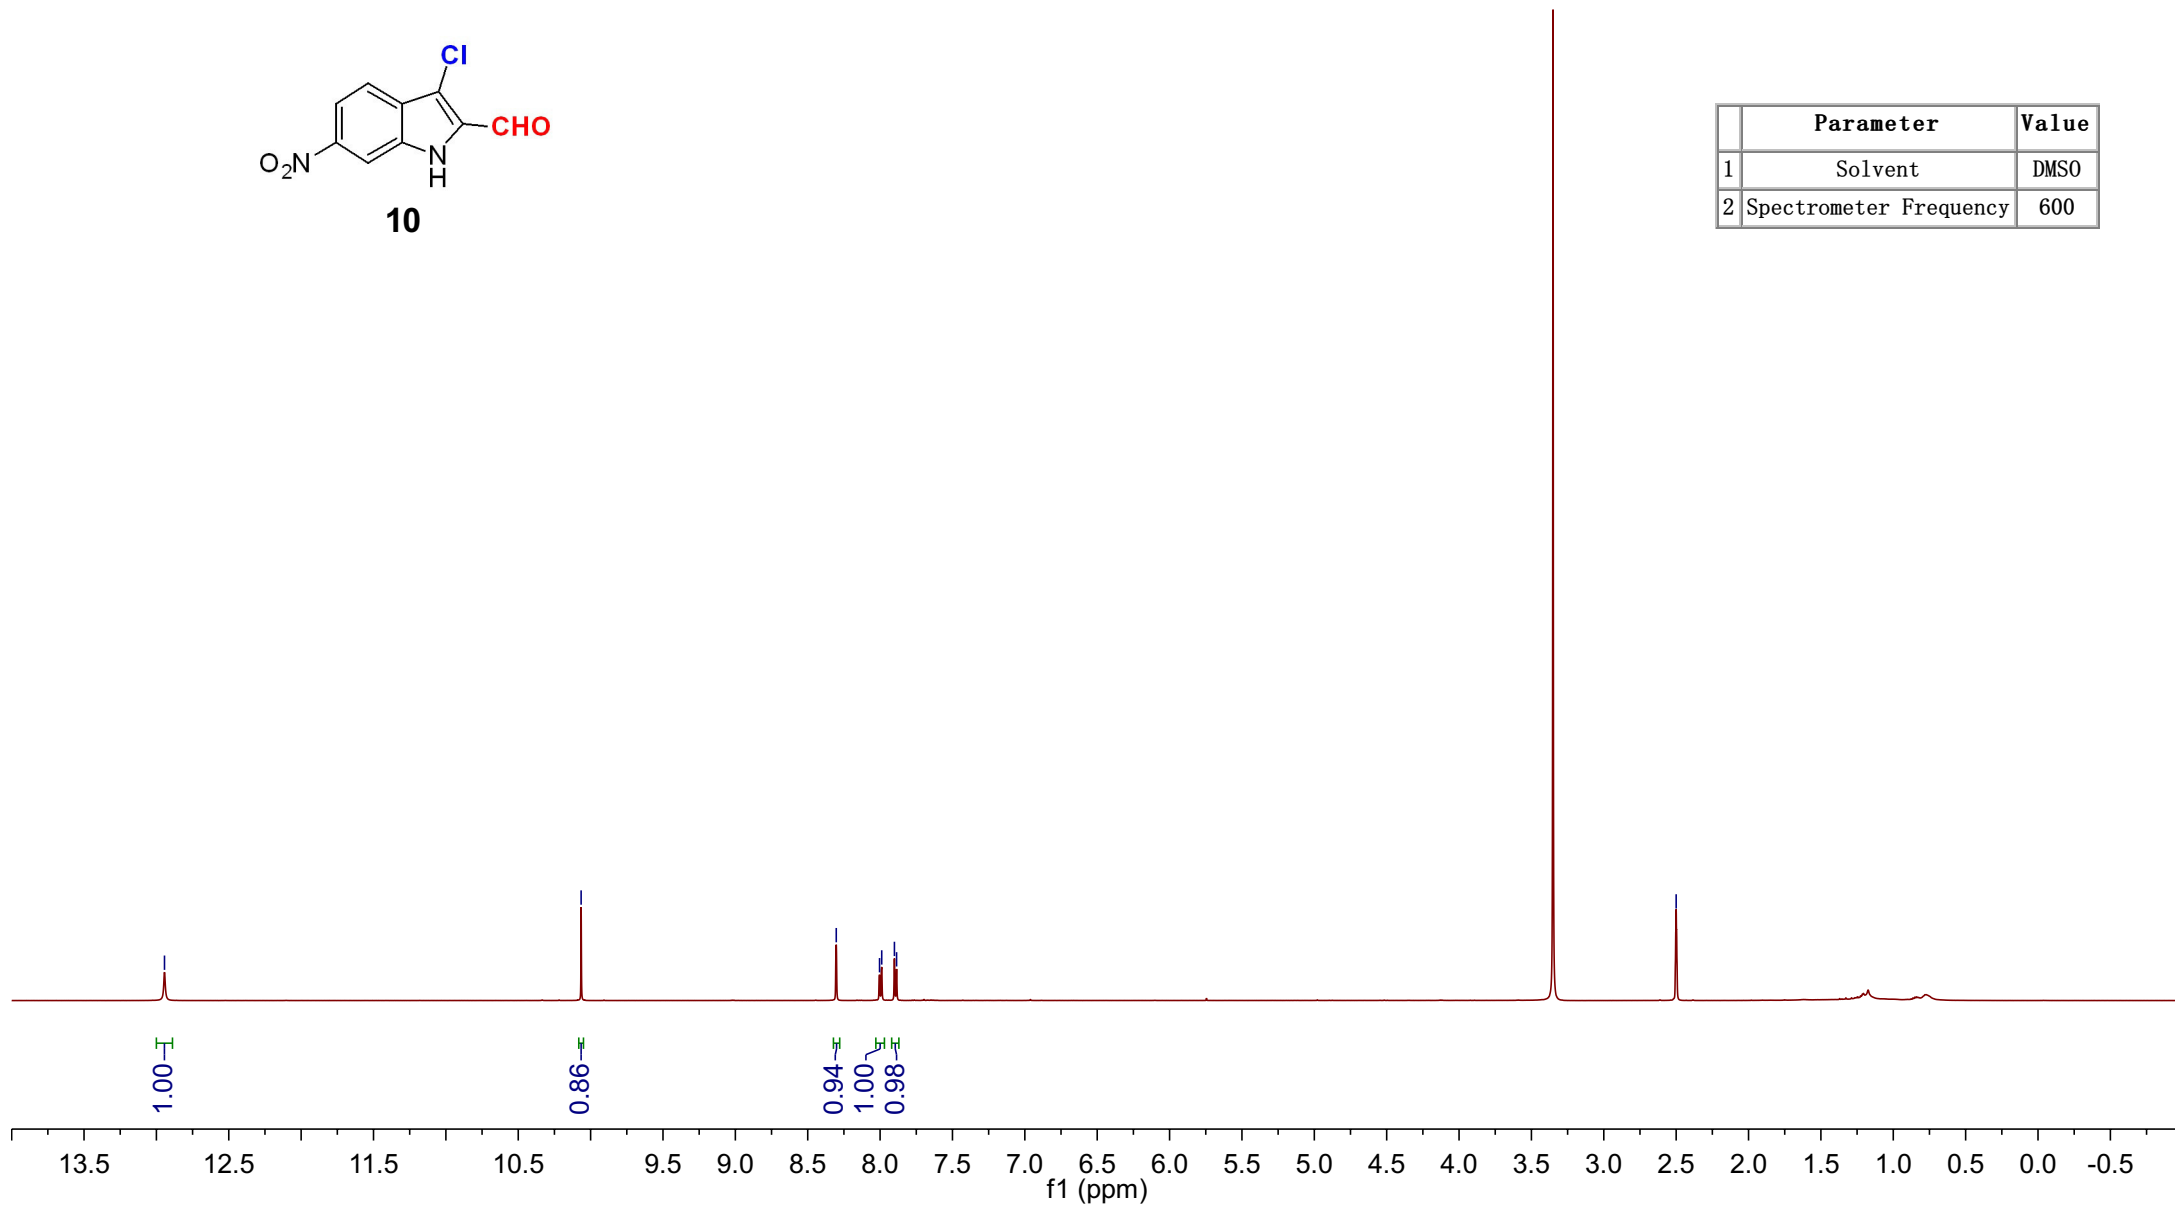



—181.05

—146.11

—134.47

—134.34

—128.24

—120.76

—115.69

—113.37

—110.08

—39.52

|   | Parameter              | Value |
|---|------------------------|-------|
| 1 | Solvent                | DMSO  |
| 2 | Spectrometer Frequency | 150   |



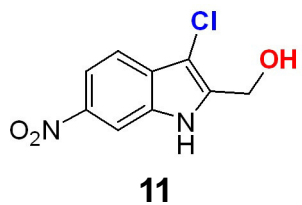

—12.52

8.35  
8.34  
7.98  
7.98  
7.97  
7.97  
7.67  
7.65

—4.98

—2.50

|   | Parameter              | Value |
|---|------------------------|-------|
| 1 | Solvent                | DMSO  |
| 2 | Spectrometer Frequency | 600   |

1.00

0.96  
1.05  
1.05

2.11

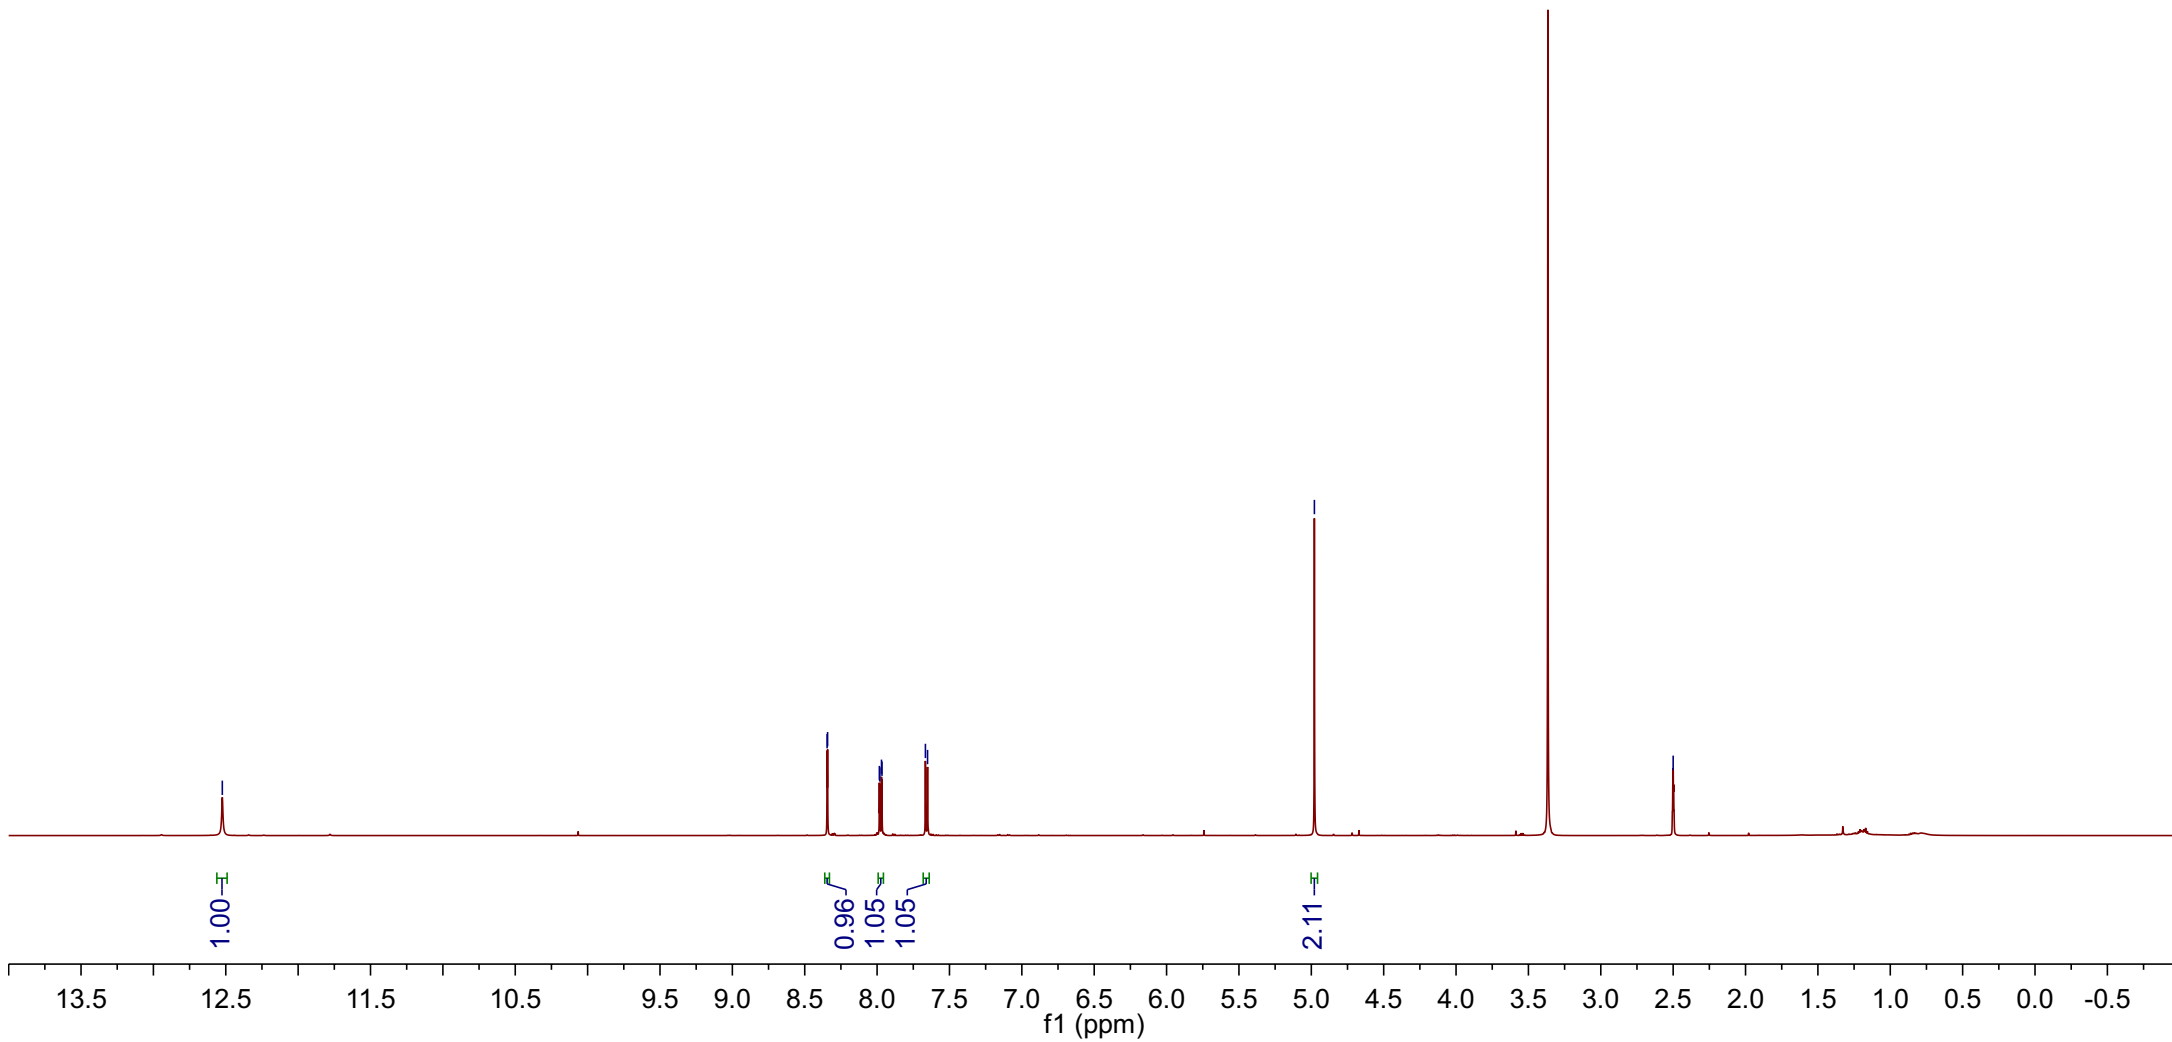



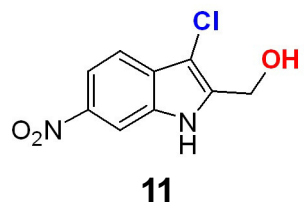

—143.53

—136.60

—132.97

—128.77

—118.19

—115.28

—109.03

—104.20

—39.52

—35.39

|   | Parameter              | Value |
|---|------------------------|-------|
| 1 | Solvent                | DMSO  |
| 2 | Spectrometer Frequency | 150   |

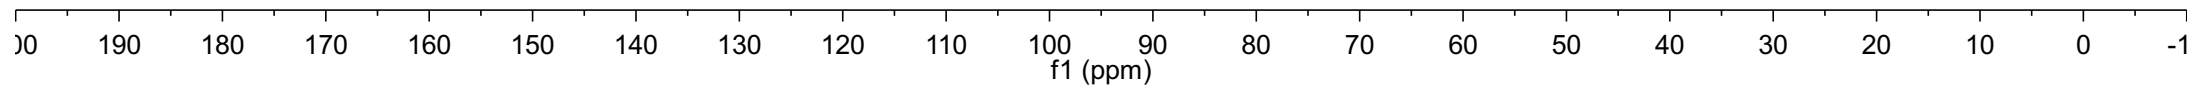

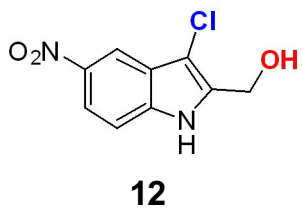

—12.51

8.36  
8.36  
8.10  
8.09  
8.08  
8.08  
7.62  
7.60

—4.95

—2.50

|   | Parameter              | Value |
|---|------------------------|-------|
| 1 | Solvent                | DMSO  |
| 2 | Spectrometer Frequency | 600   |

1.00

0.93

1.01

1.03

2.09

13.5 12.5 11.5 10.5 9.5 9.0 8.5 8.0 7.5 7.0 6.5 6.0 5.5 5.0 4.5 4.0 3.5 3.0 2.5 2.0 1.5 1.0 0.5 0.0 -0.5

f1 (ppm)

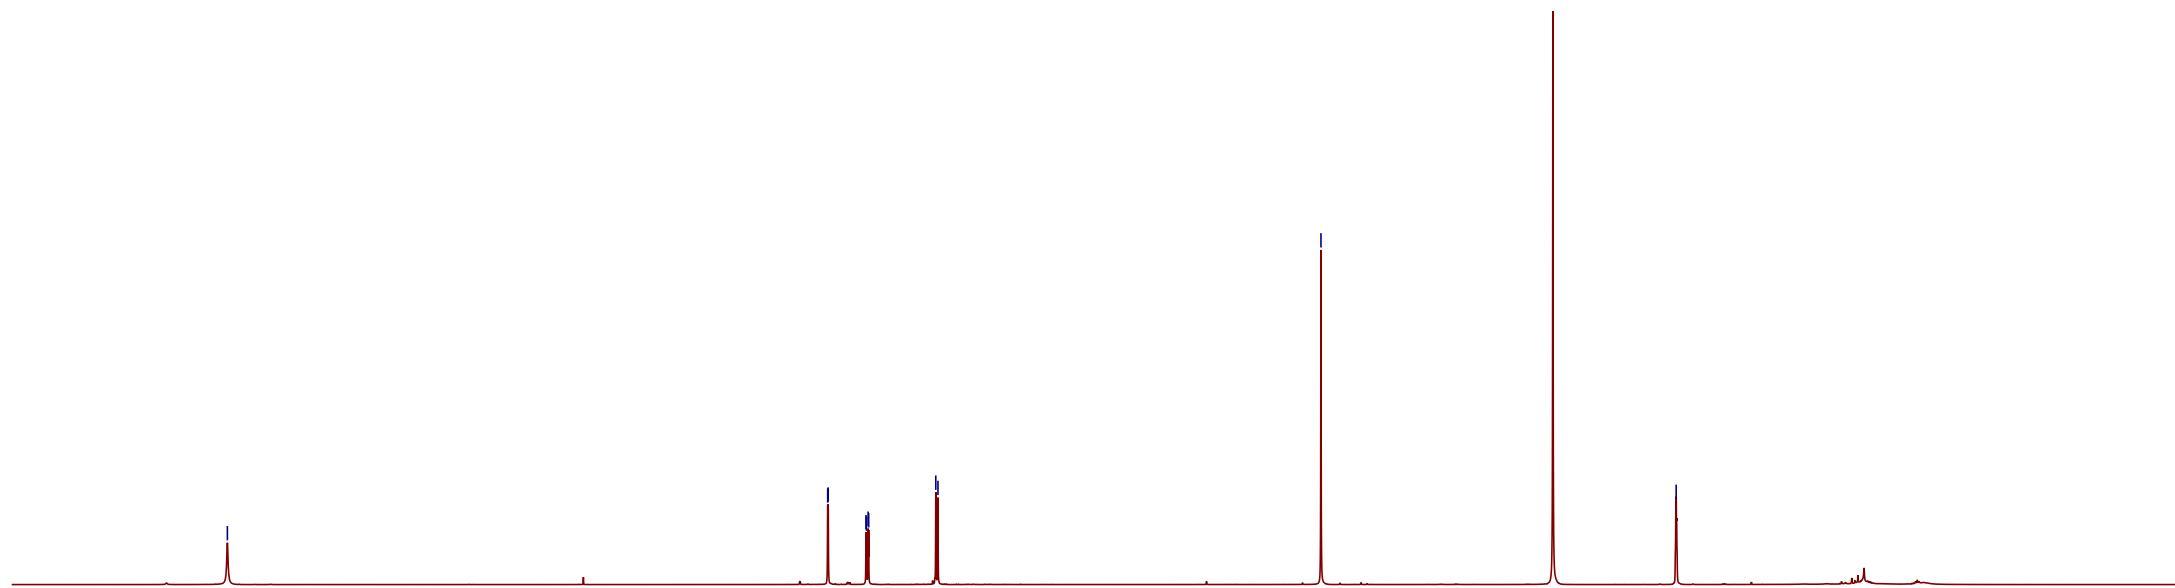

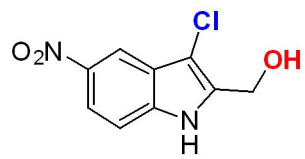

12

141.47  
137.65  
134.10  
123.79  
118.48  
114.53  
113.02  
105.57

39.52  
35.43

|   | Parameter              | Value |
|---|------------------------|-------|
| 1 | Solvent                | DMSO  |
| 2 | Spectrometer Frequency | 150   |

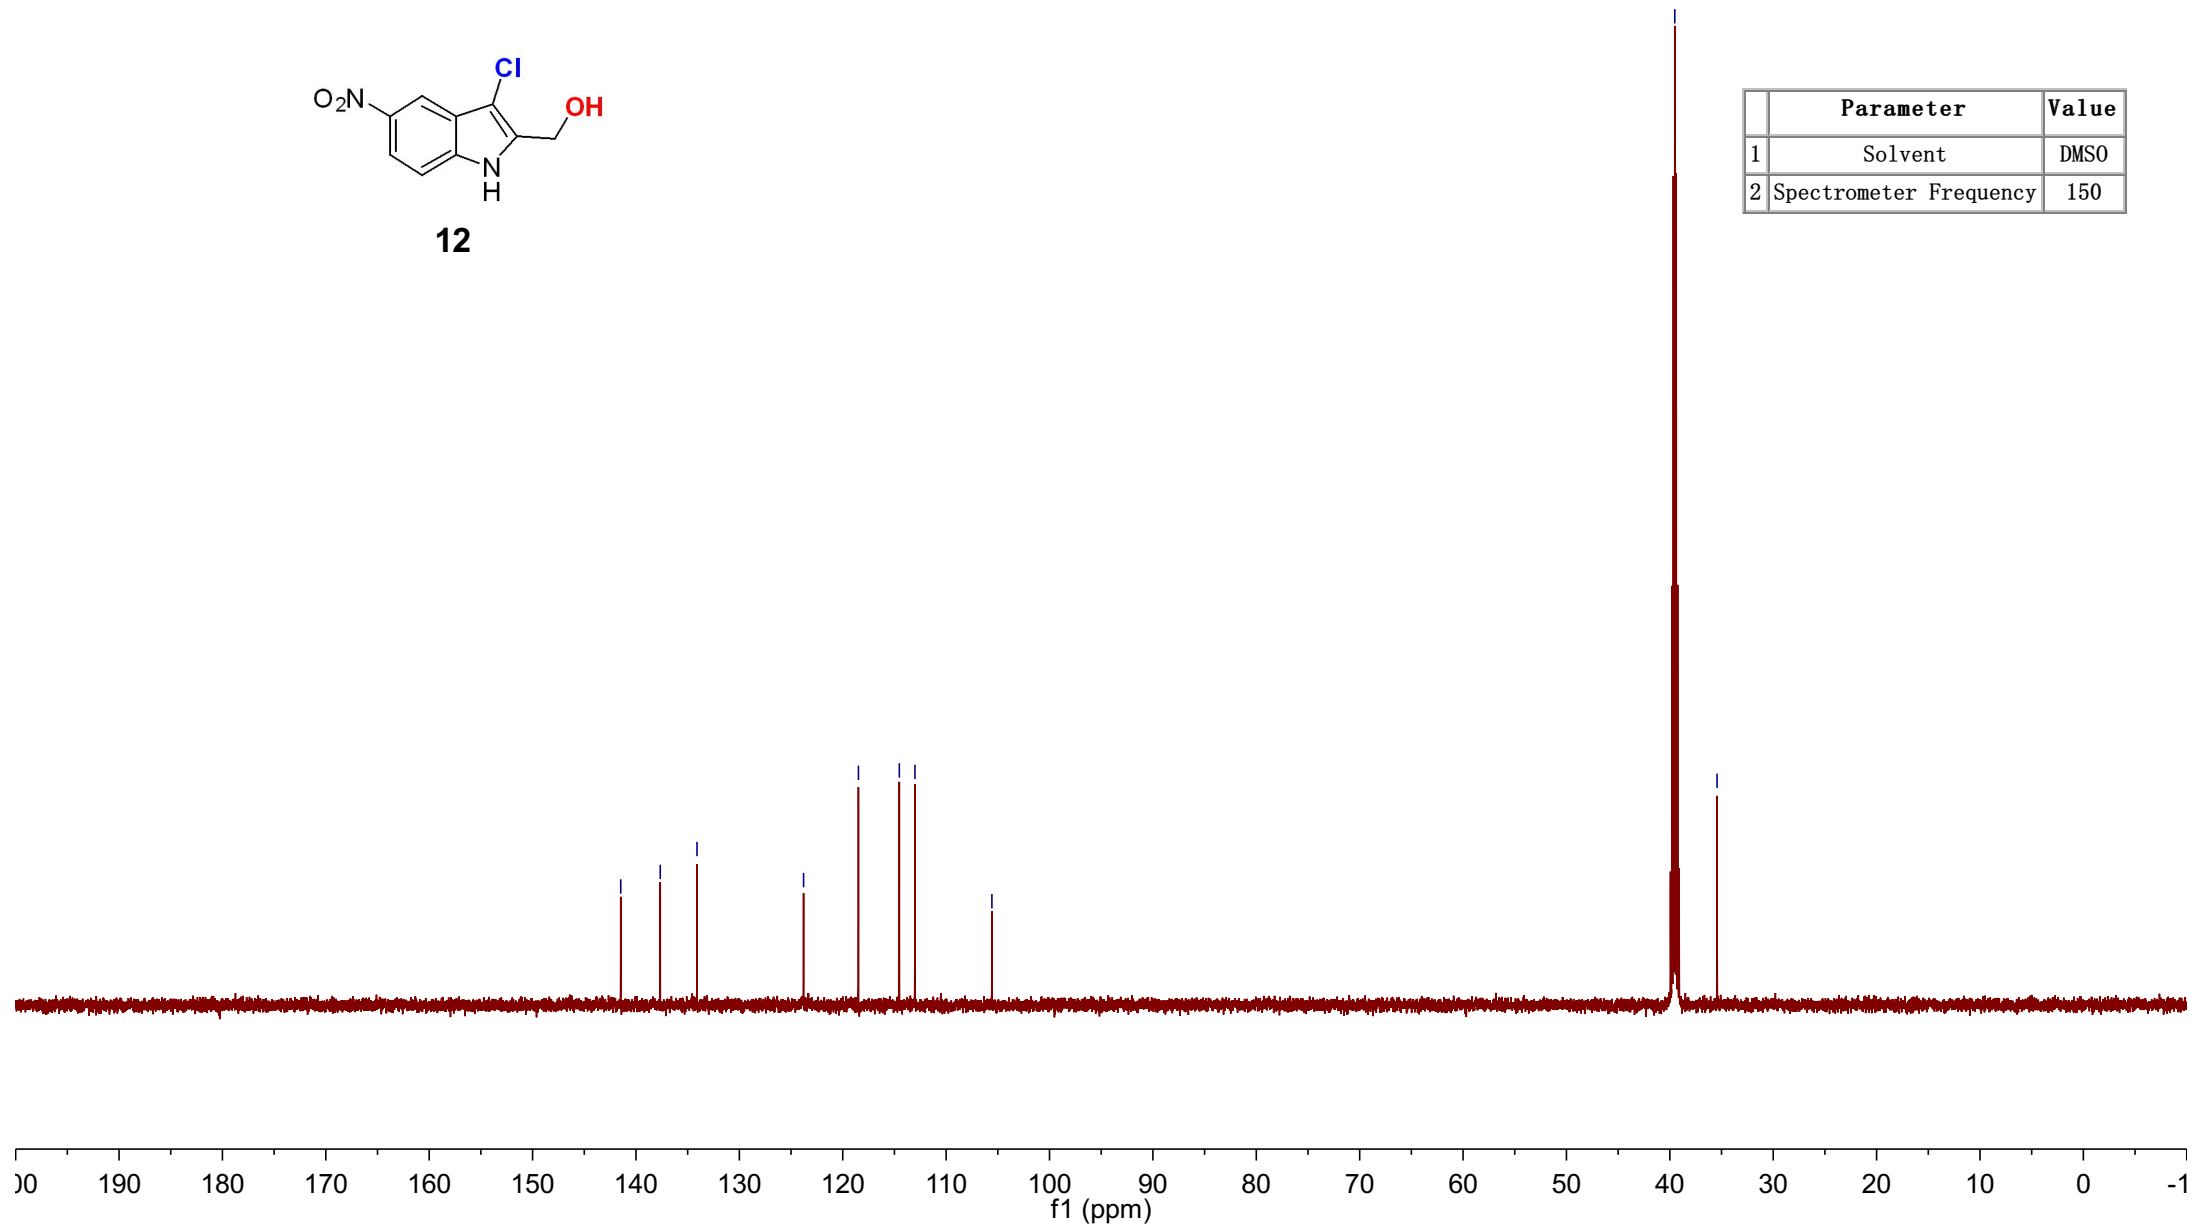

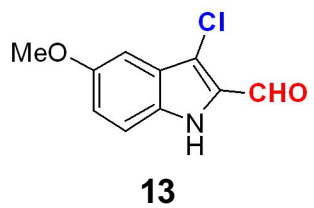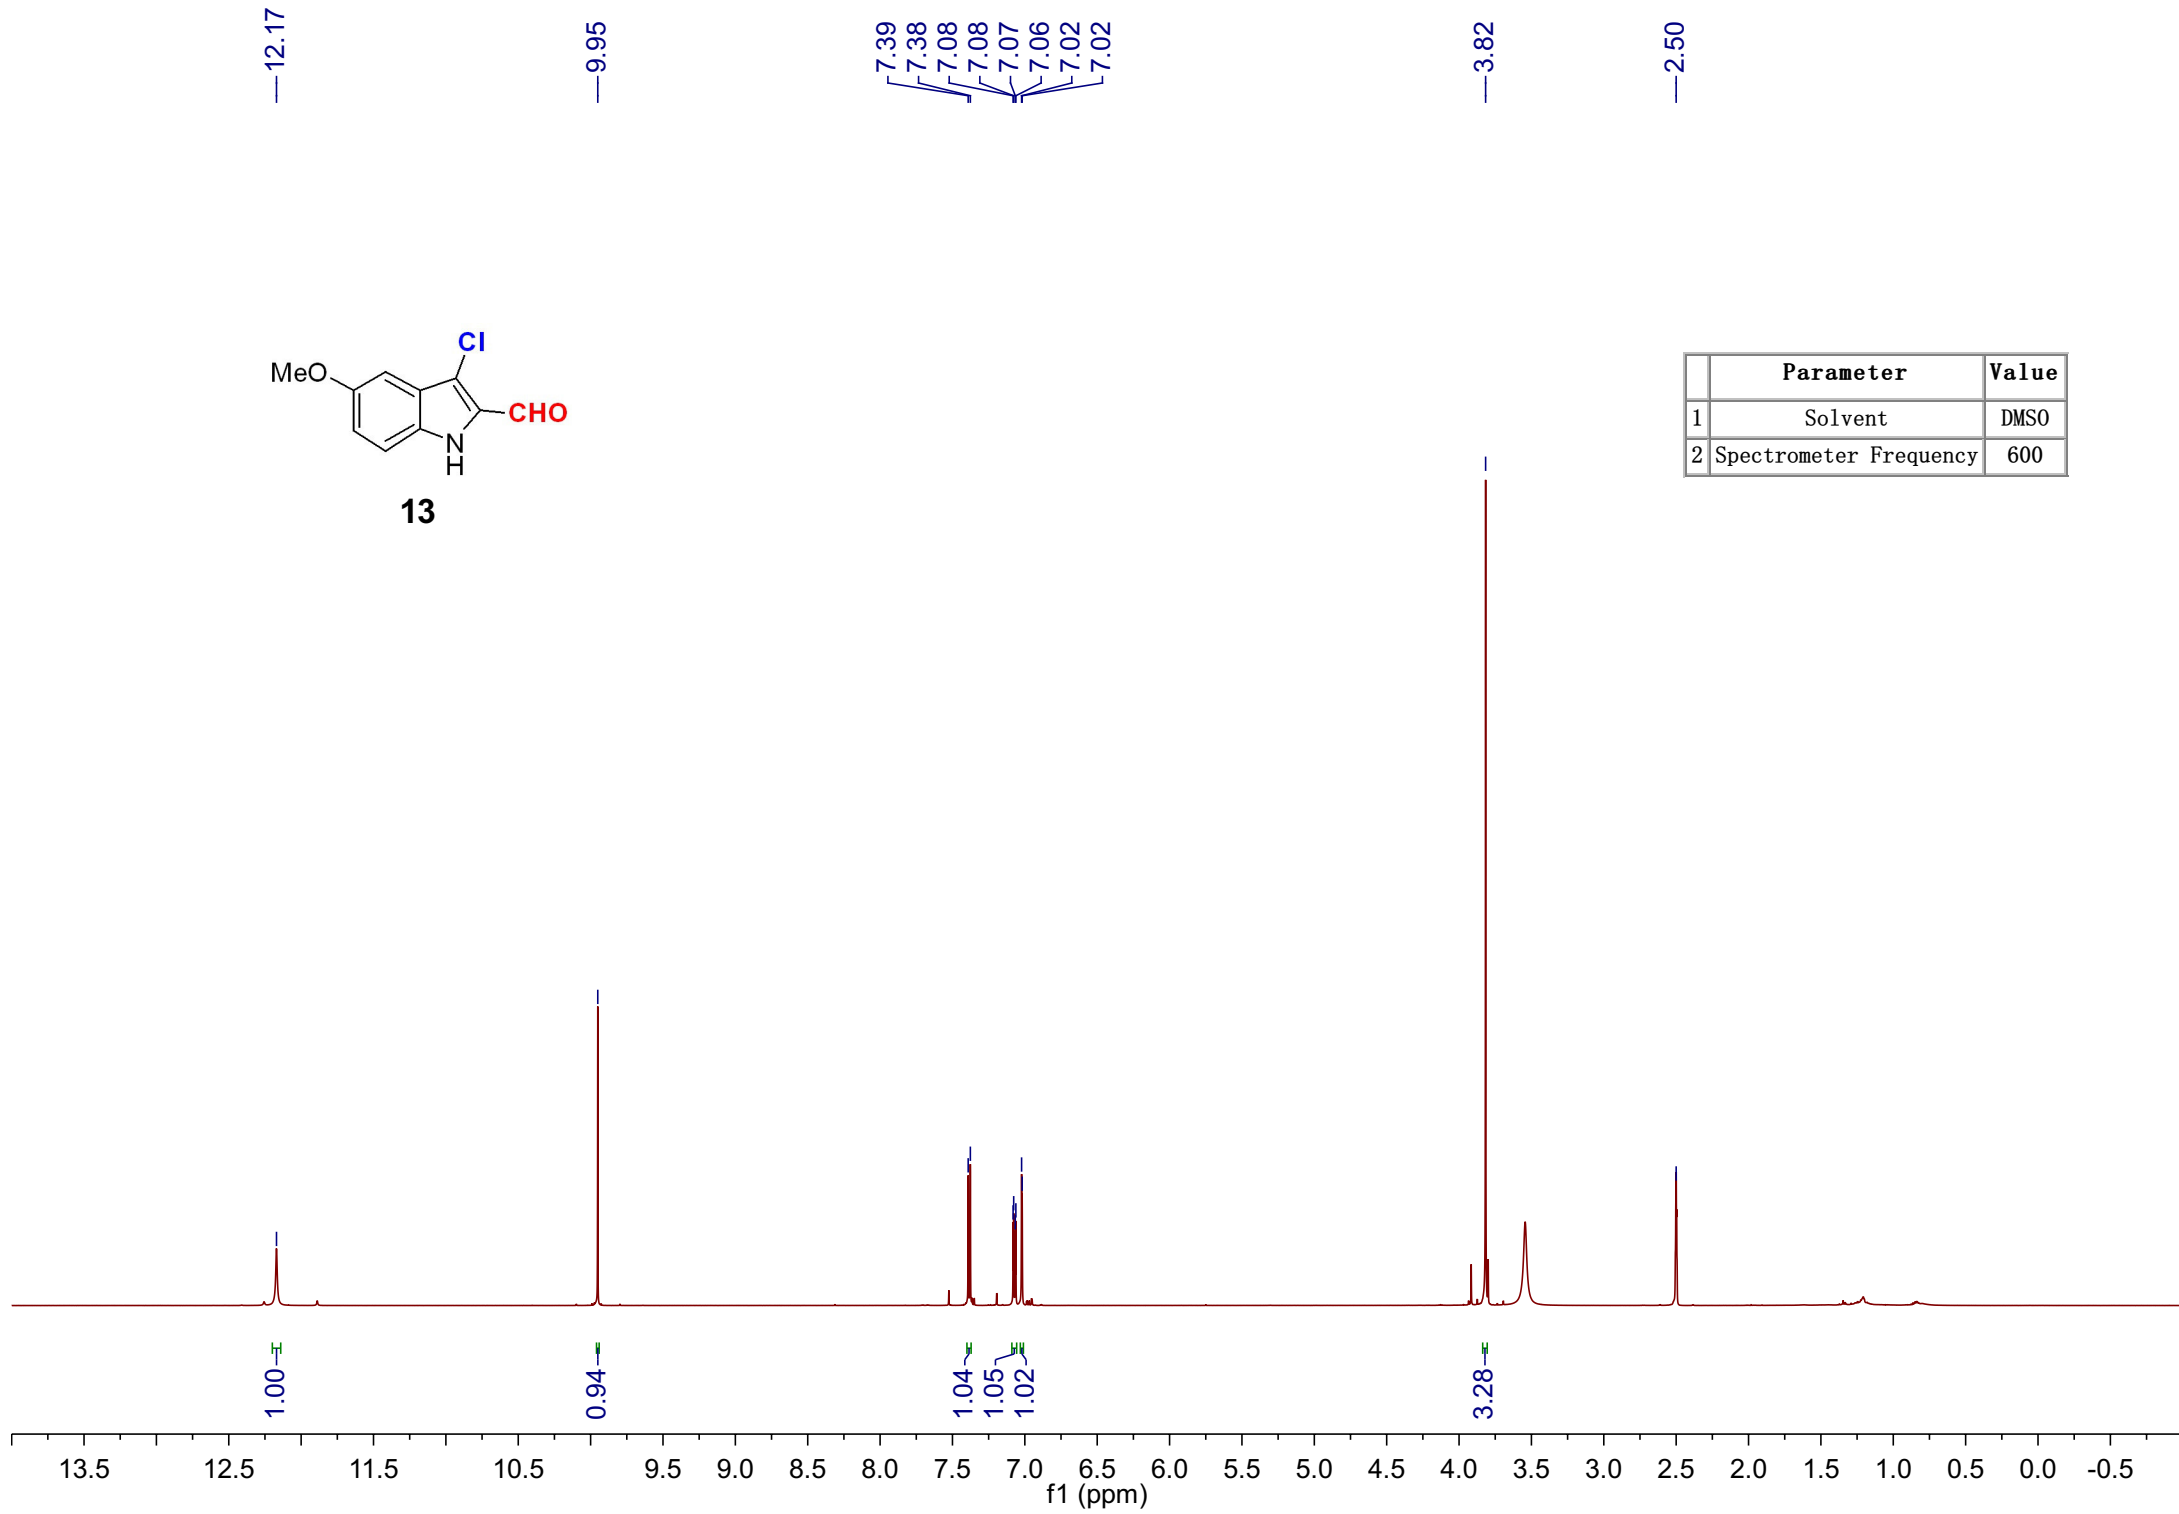



—179.95

—154.86

—132.00

—130.62

—124.67

—120.00

—114.75

—113.54

—98.48

—55.41

—39.52

|   | Parameter              | Value |
|---|------------------------|-------|
| 1 | Solvent                | DMSO  |
| 2 | Spectrometer Frequency | 150   |

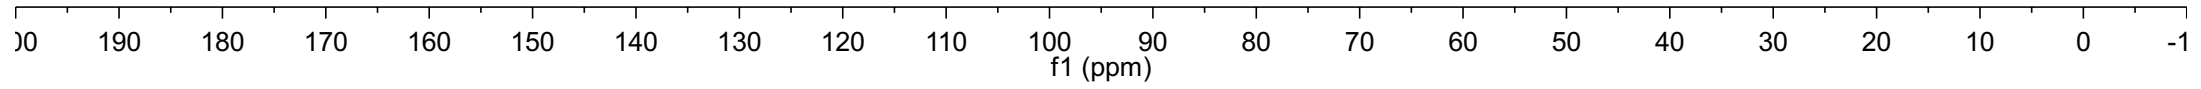

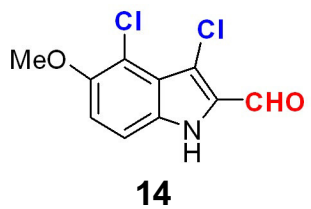

|   | Parameter              | Value |
|---|------------------------|-------|
| 1 | Solvent                | DMSO  |
| 2 | Spectrometer Frequency | 600   |

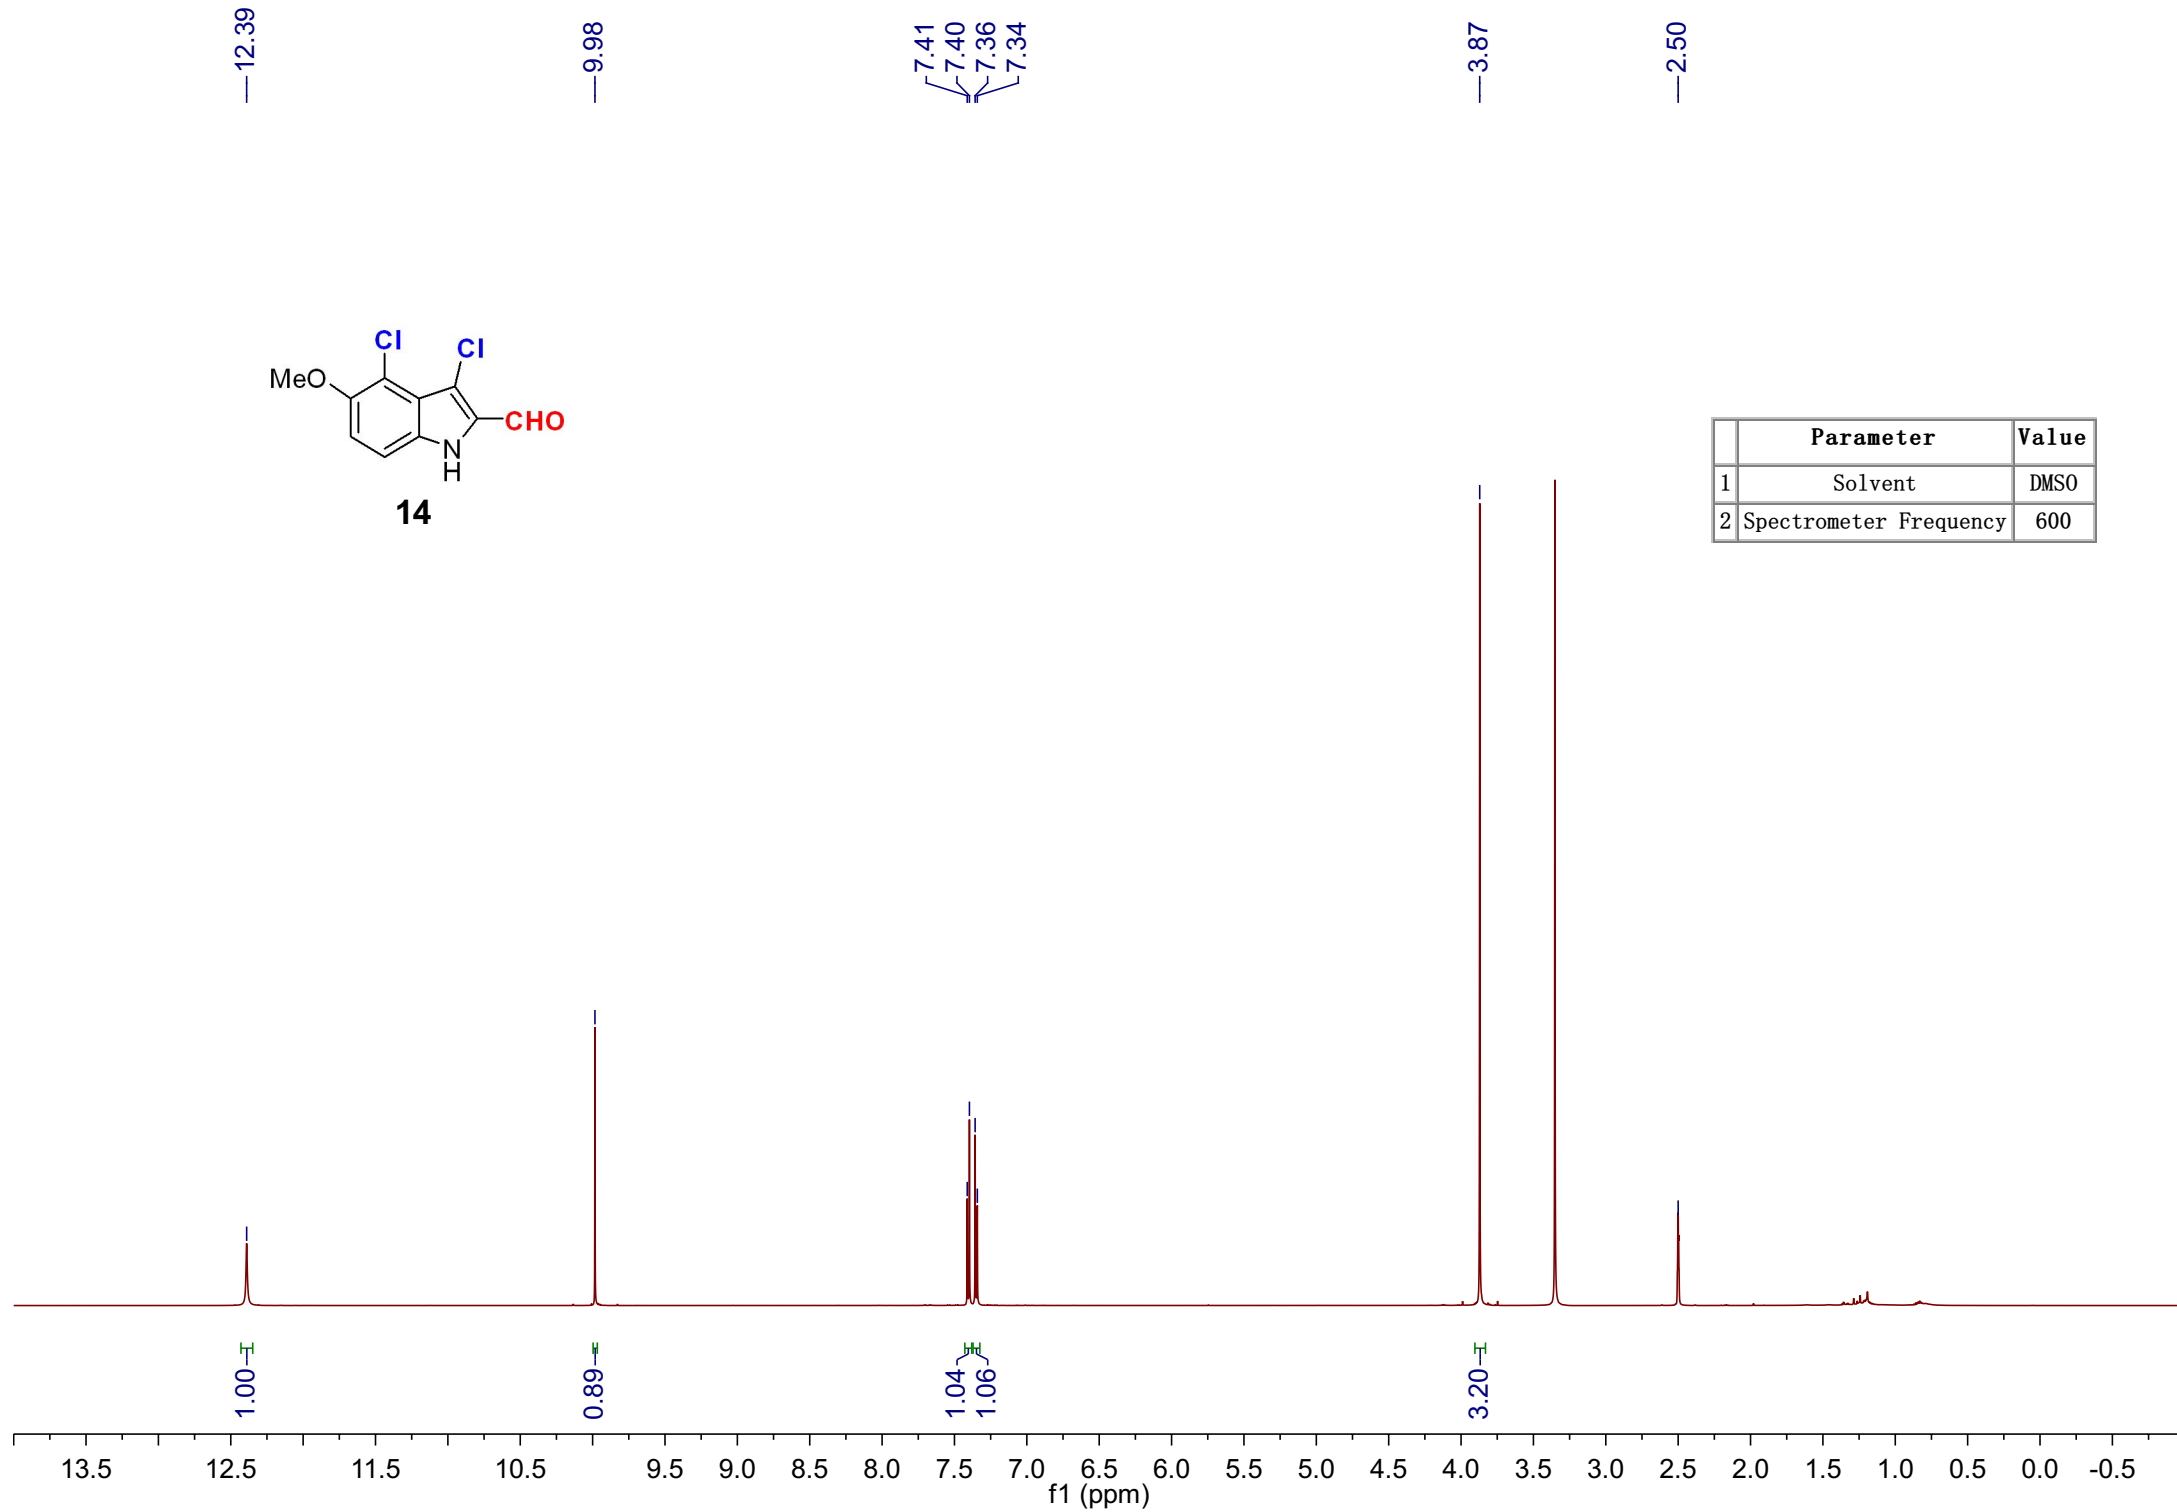

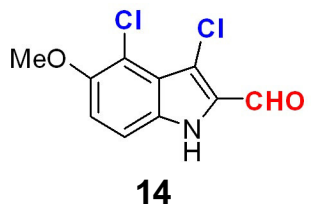

—180.62

—149.97

132.99  
132.00

121.02  
116.05  
113.04  
112.56  
111.88

—57.37

—39.52

|   | Parameter              | Value |
|---|------------------------|-------|
| 1 | Solvent                | DMSO  |
| 2 | Spectrometer Frequency | 150   |

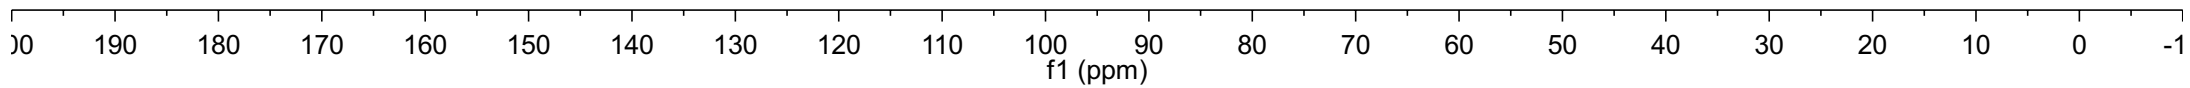

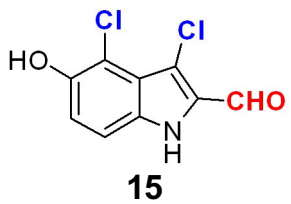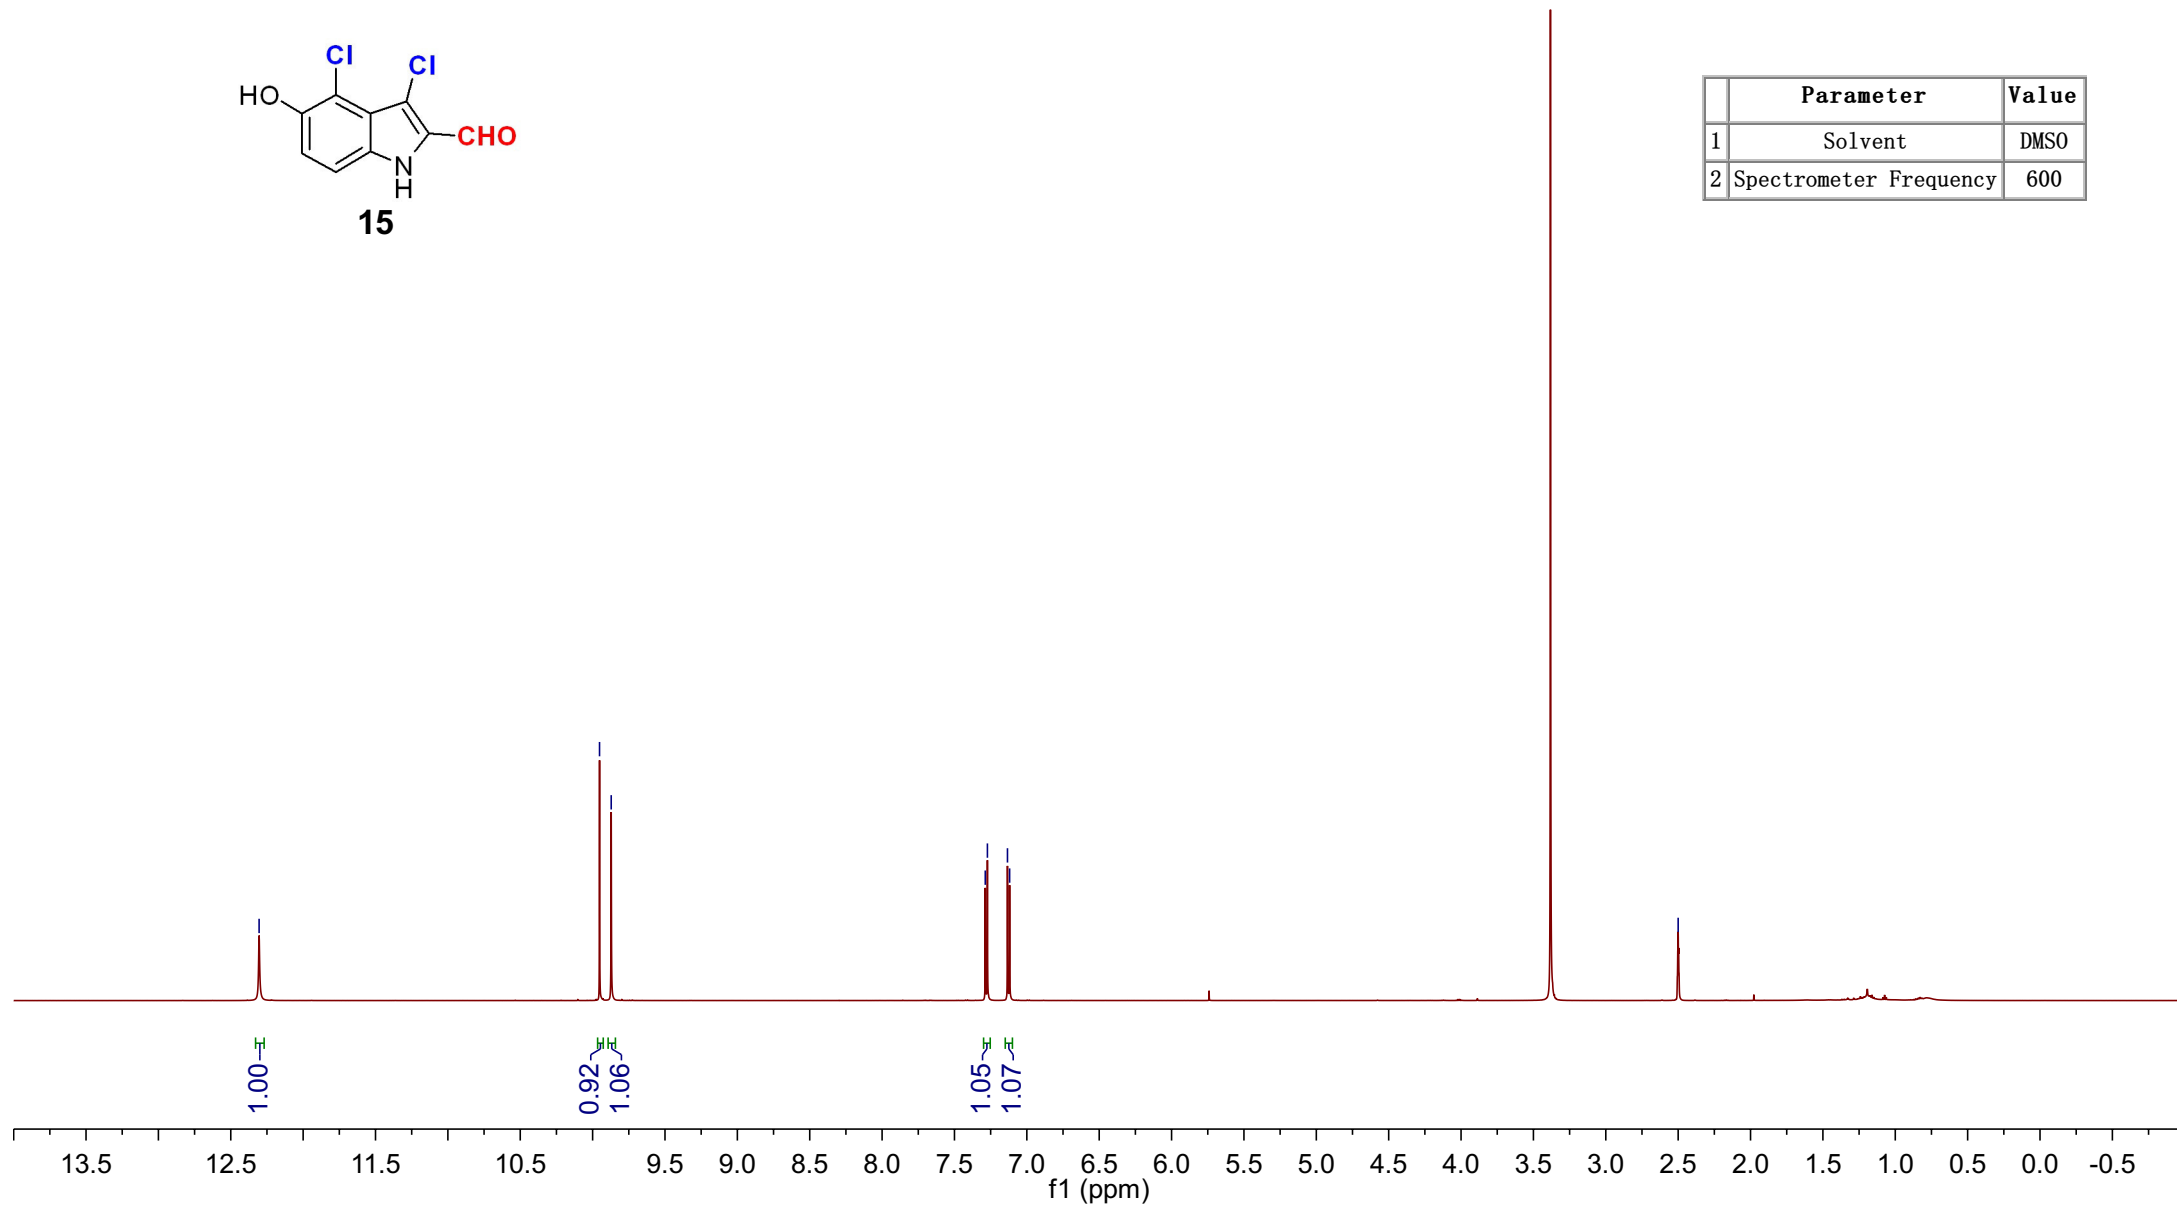

|   | Parameter              | Value |
|---|------------------------|-------|
| 1 | Solvent                | DMSO  |
| 2 | Spectrometer Frequency | 600   |



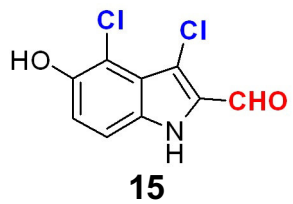

—180.38

—148.27

—132.26  
—131.37

—121.07  
—119.56

—113.02  
—112.47  
—108.71

—39.52

|   | Parameter              | Value |
|---|------------------------|-------|
| 1 | Solvent                | DMSO  |
| 2 | Spectrometer Frequency | 150   |



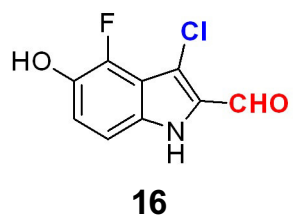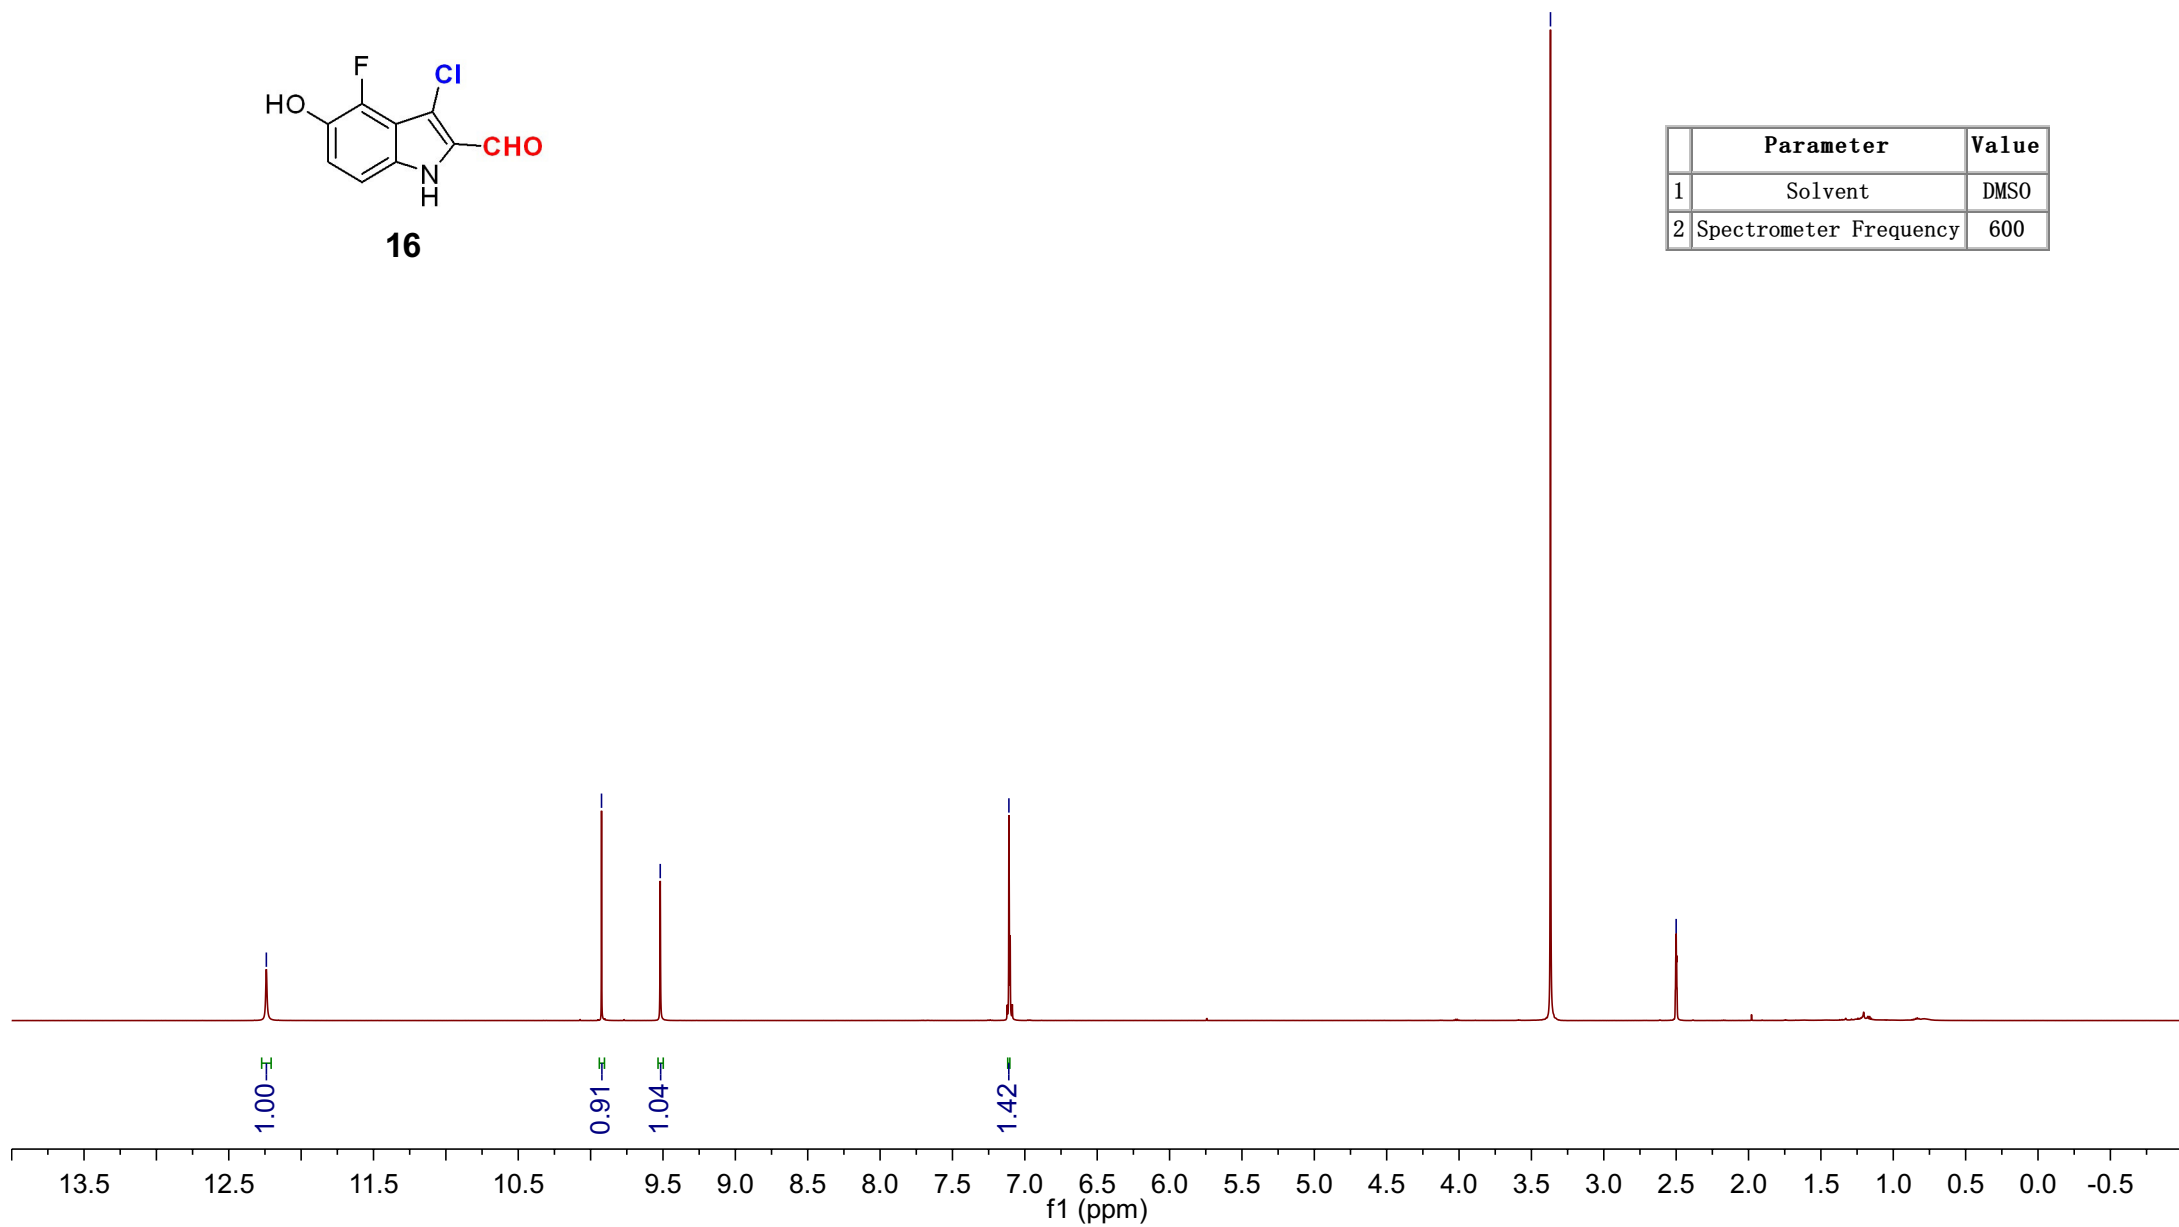

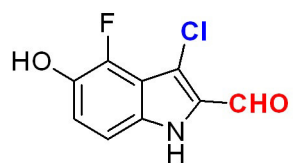

16

—180.13

143.45  
141.83  
137.73  
137.66  
132.31  
132.27  
130.93  
121.19  
115.07  
114.97  
110.51  
109.48  
109.45

39.52

|   | Parameter              | Value |
|---|------------------------|-------|
| 1 | Solvent                | DMSO  |
| 2 | Spectrometer Frequency | 150   |

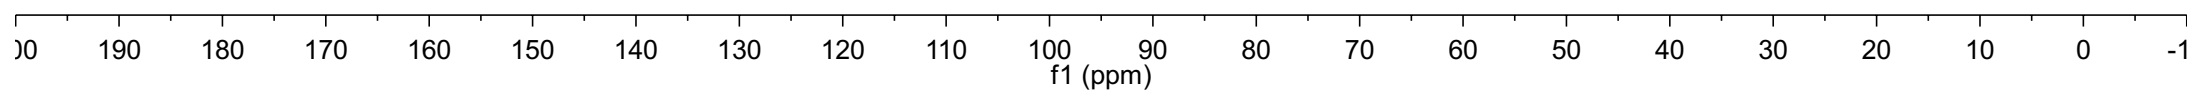



**16**

|   | Parameter              | Value |
|---|------------------------|-------|
| 1 | Solvent                | DMSO  |
| 2 | Spectrometer Frequency | 565   |

---151.07

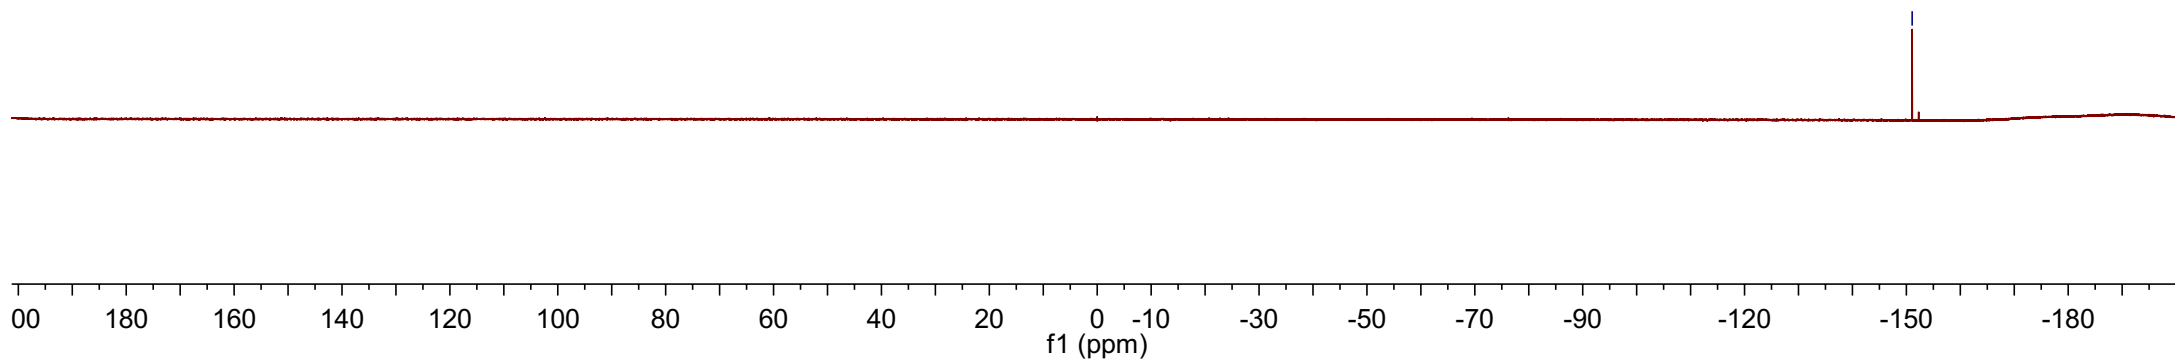

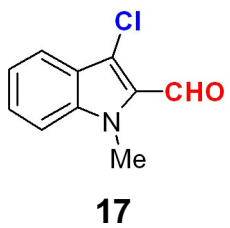

—10.15

7.73  
7.71  
7.47  
7.47  
7.46  
7.45  
7.45  
7.44  
7.44  
7.36  
7.34  
7.26  
7.24  
7.24  
7.23  
7.22  
7.21  
7.21

—4.04

|   | Parameter              | Value |
|---|------------------------|-------|
| 1 | Solvent                | CDC13 |
| 2 | Spectrometer Frequency | 600   |

0.95

1.00

1.02

1.05

1.03

3.11

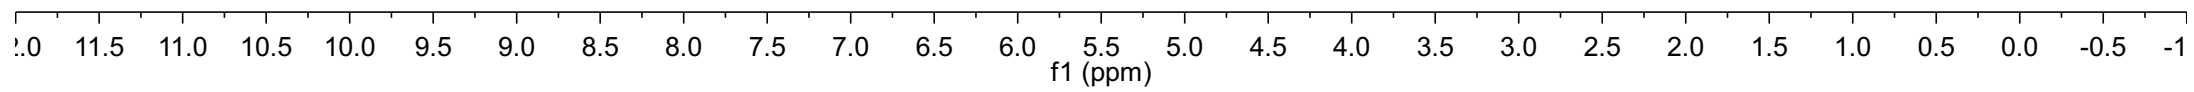

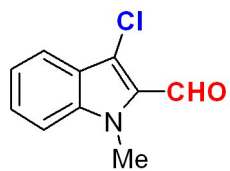

**17**

—181.36

—138.75

—129.16

—128.19

—124.33

—121.57

—120.61

—119.32

—110.58

—77.16

—31.88

|   | Parameter              | Value |
|---|------------------------|-------|
| 1 | Solvent                | CDC13 |
| 2 | Spectrometer Frequency | 150   |

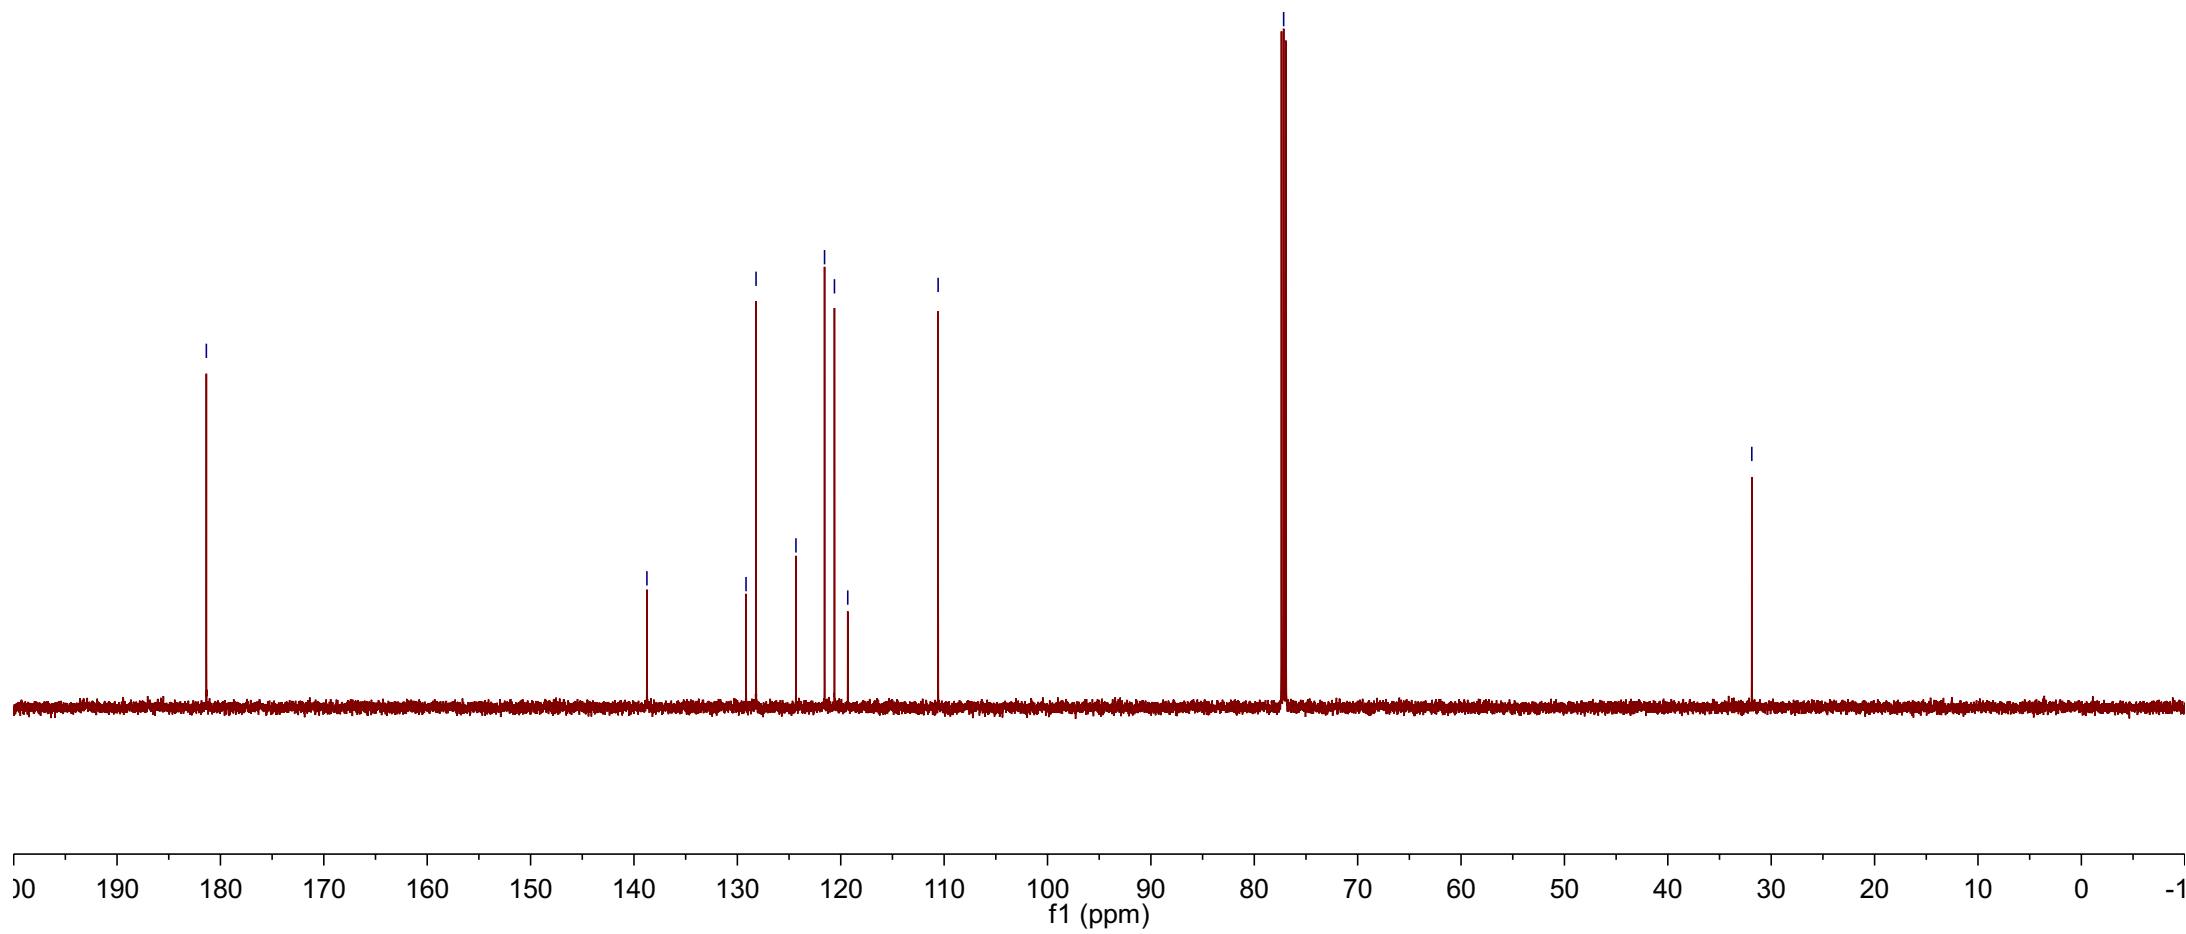

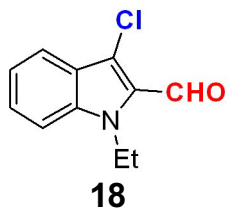

10.17

7.74  
7.73  
7.46  
7.46  
7.45  
7.44  
7.39  
7.38  
7.26  
7.24  
7.22  
7.21

4.60  
4.58  
4.57  
4.56

1.38  
1.36  
1.35

|   | Parameter              | Value |
|---|------------------------|-------|
| 1 | Solvent                | CDCl3 |
| 2 | Spectrometer Frequency | 600   |

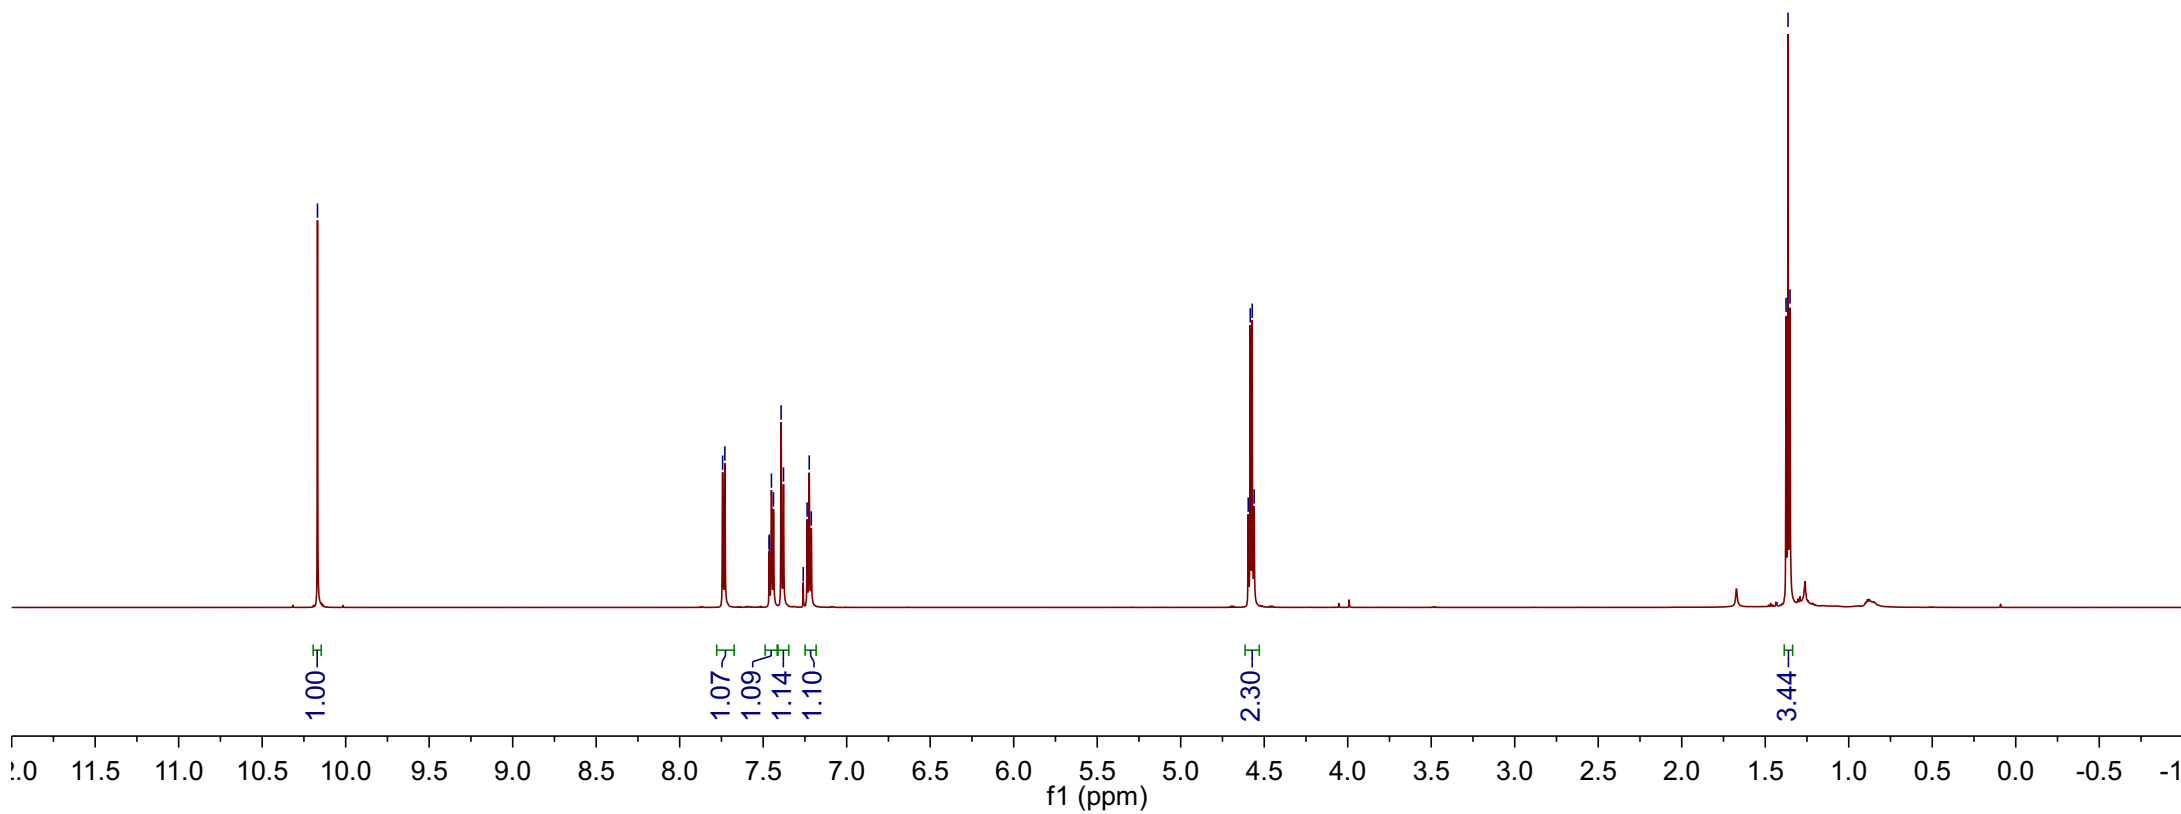

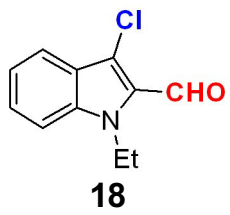

|   | Parameter              | Value |
|---|------------------------|-------|
| 1 | Solvent                | CDC13 |
| 2 | Spectrometer Frequency | 150   |

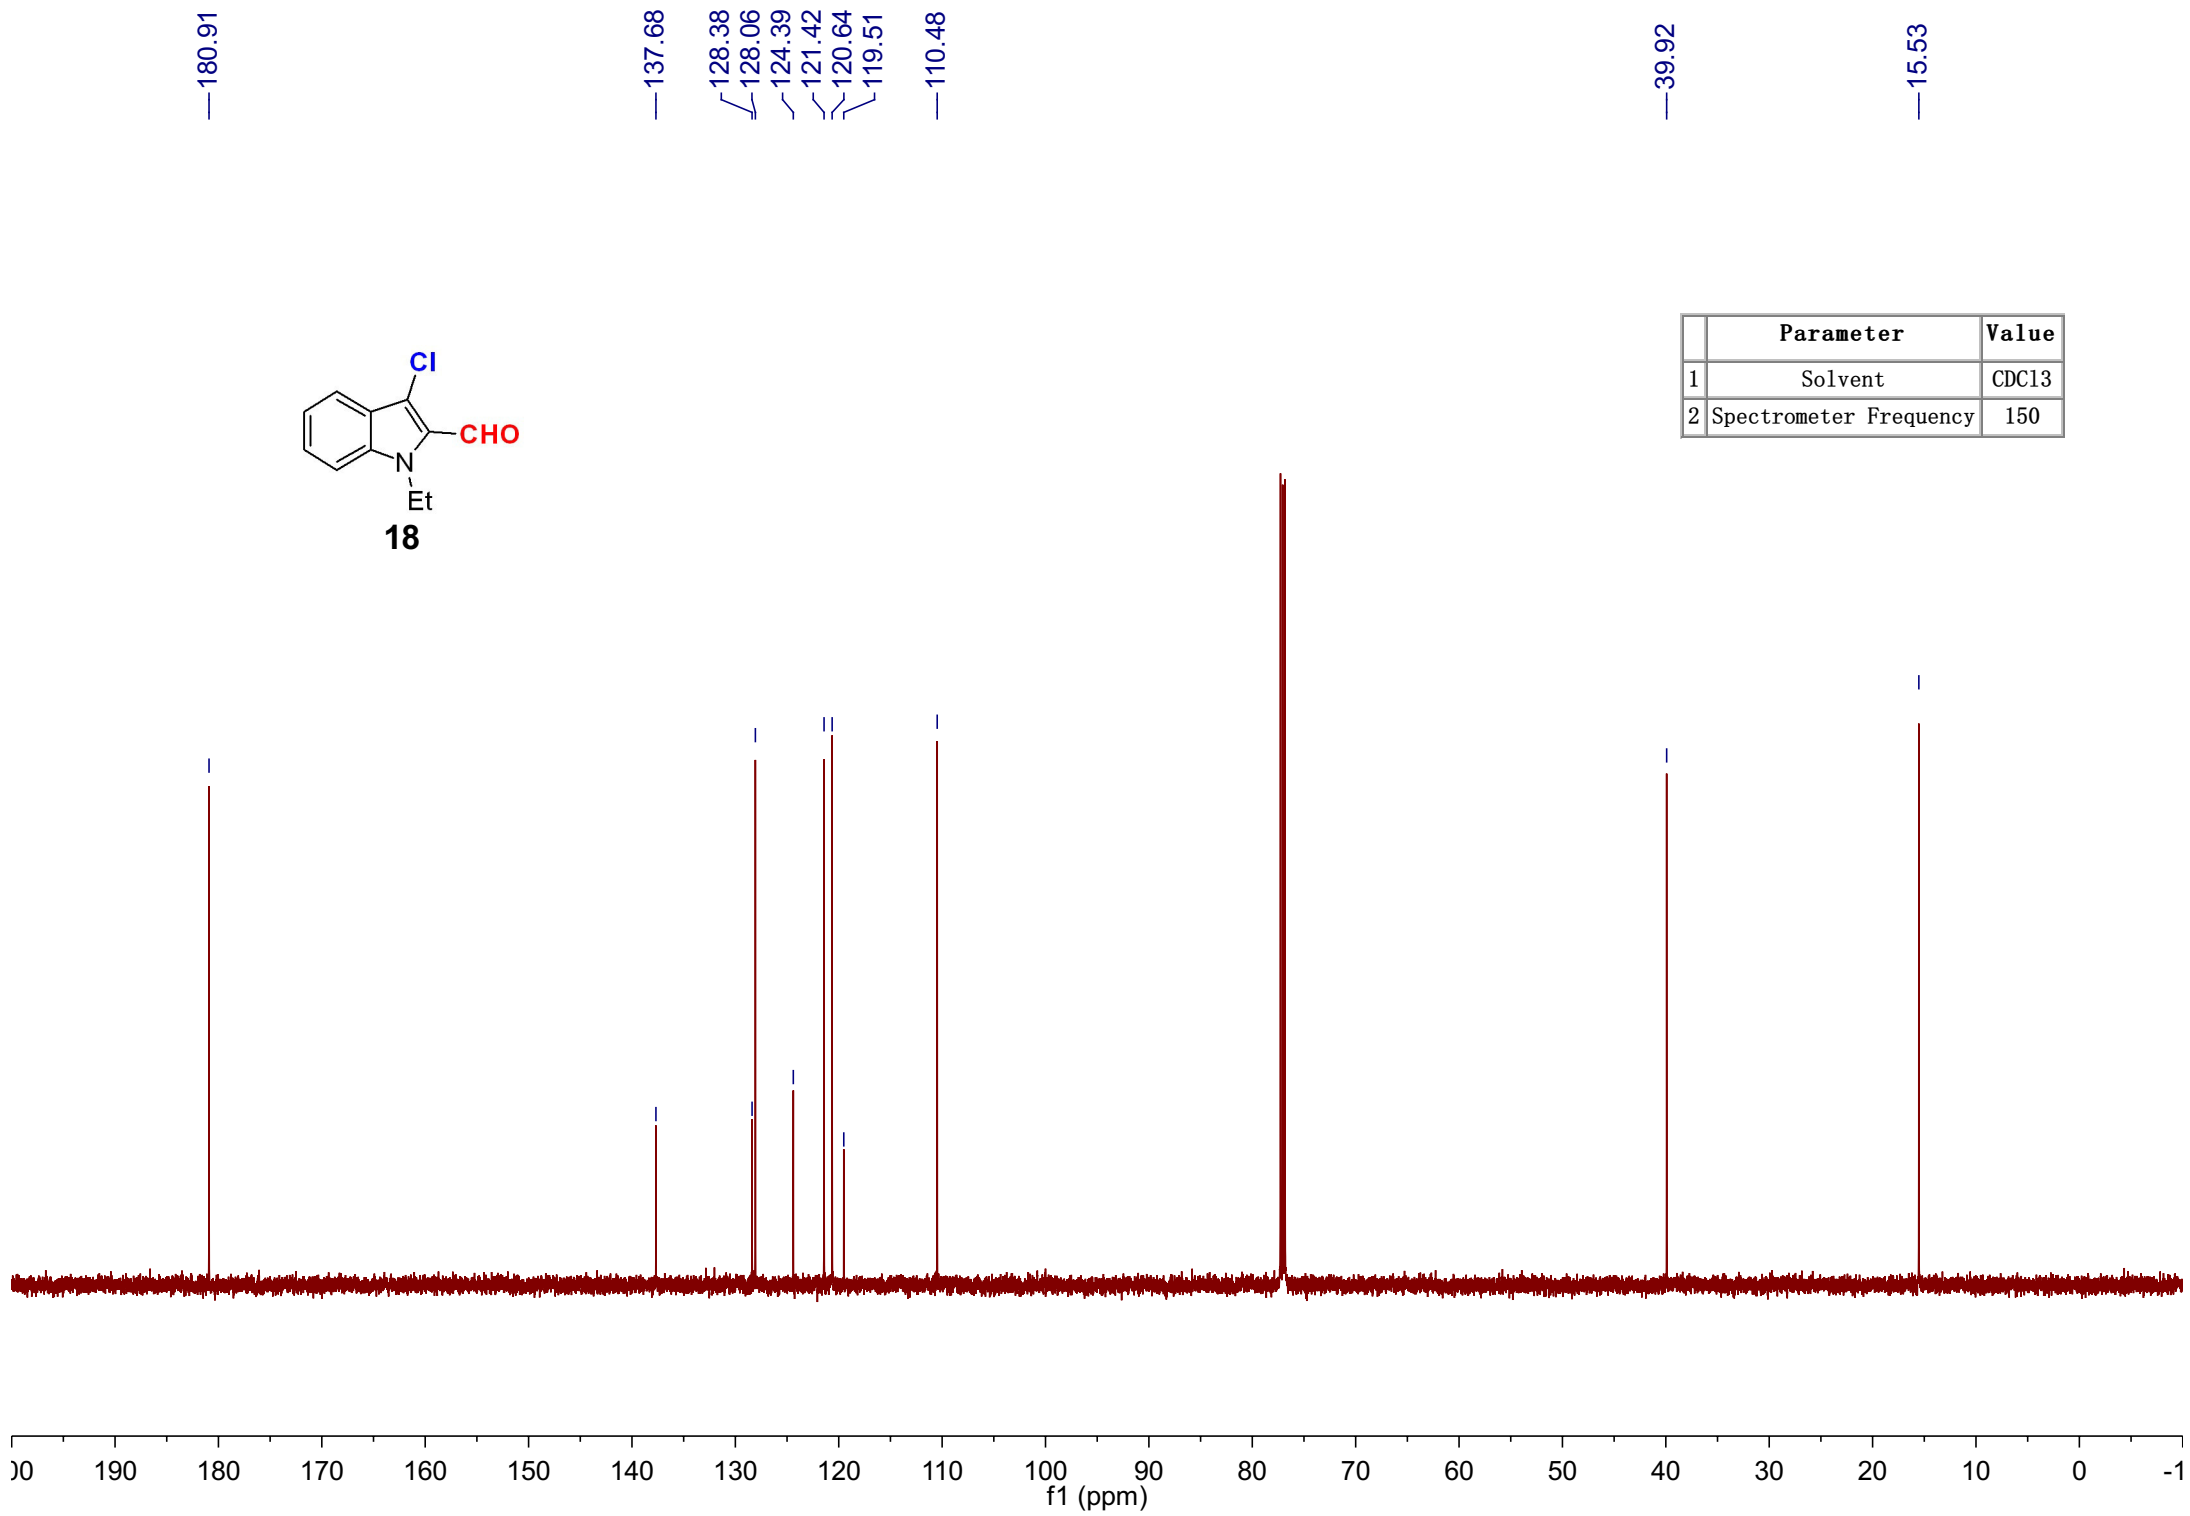



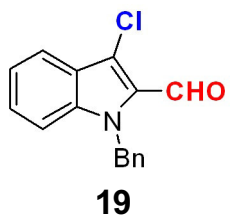

|   | Parameter              | Value |
|---|------------------------|-------|
| 1 | Solvent                | CDC13 |
| 2 | Spectrometer Frequency | 600   |

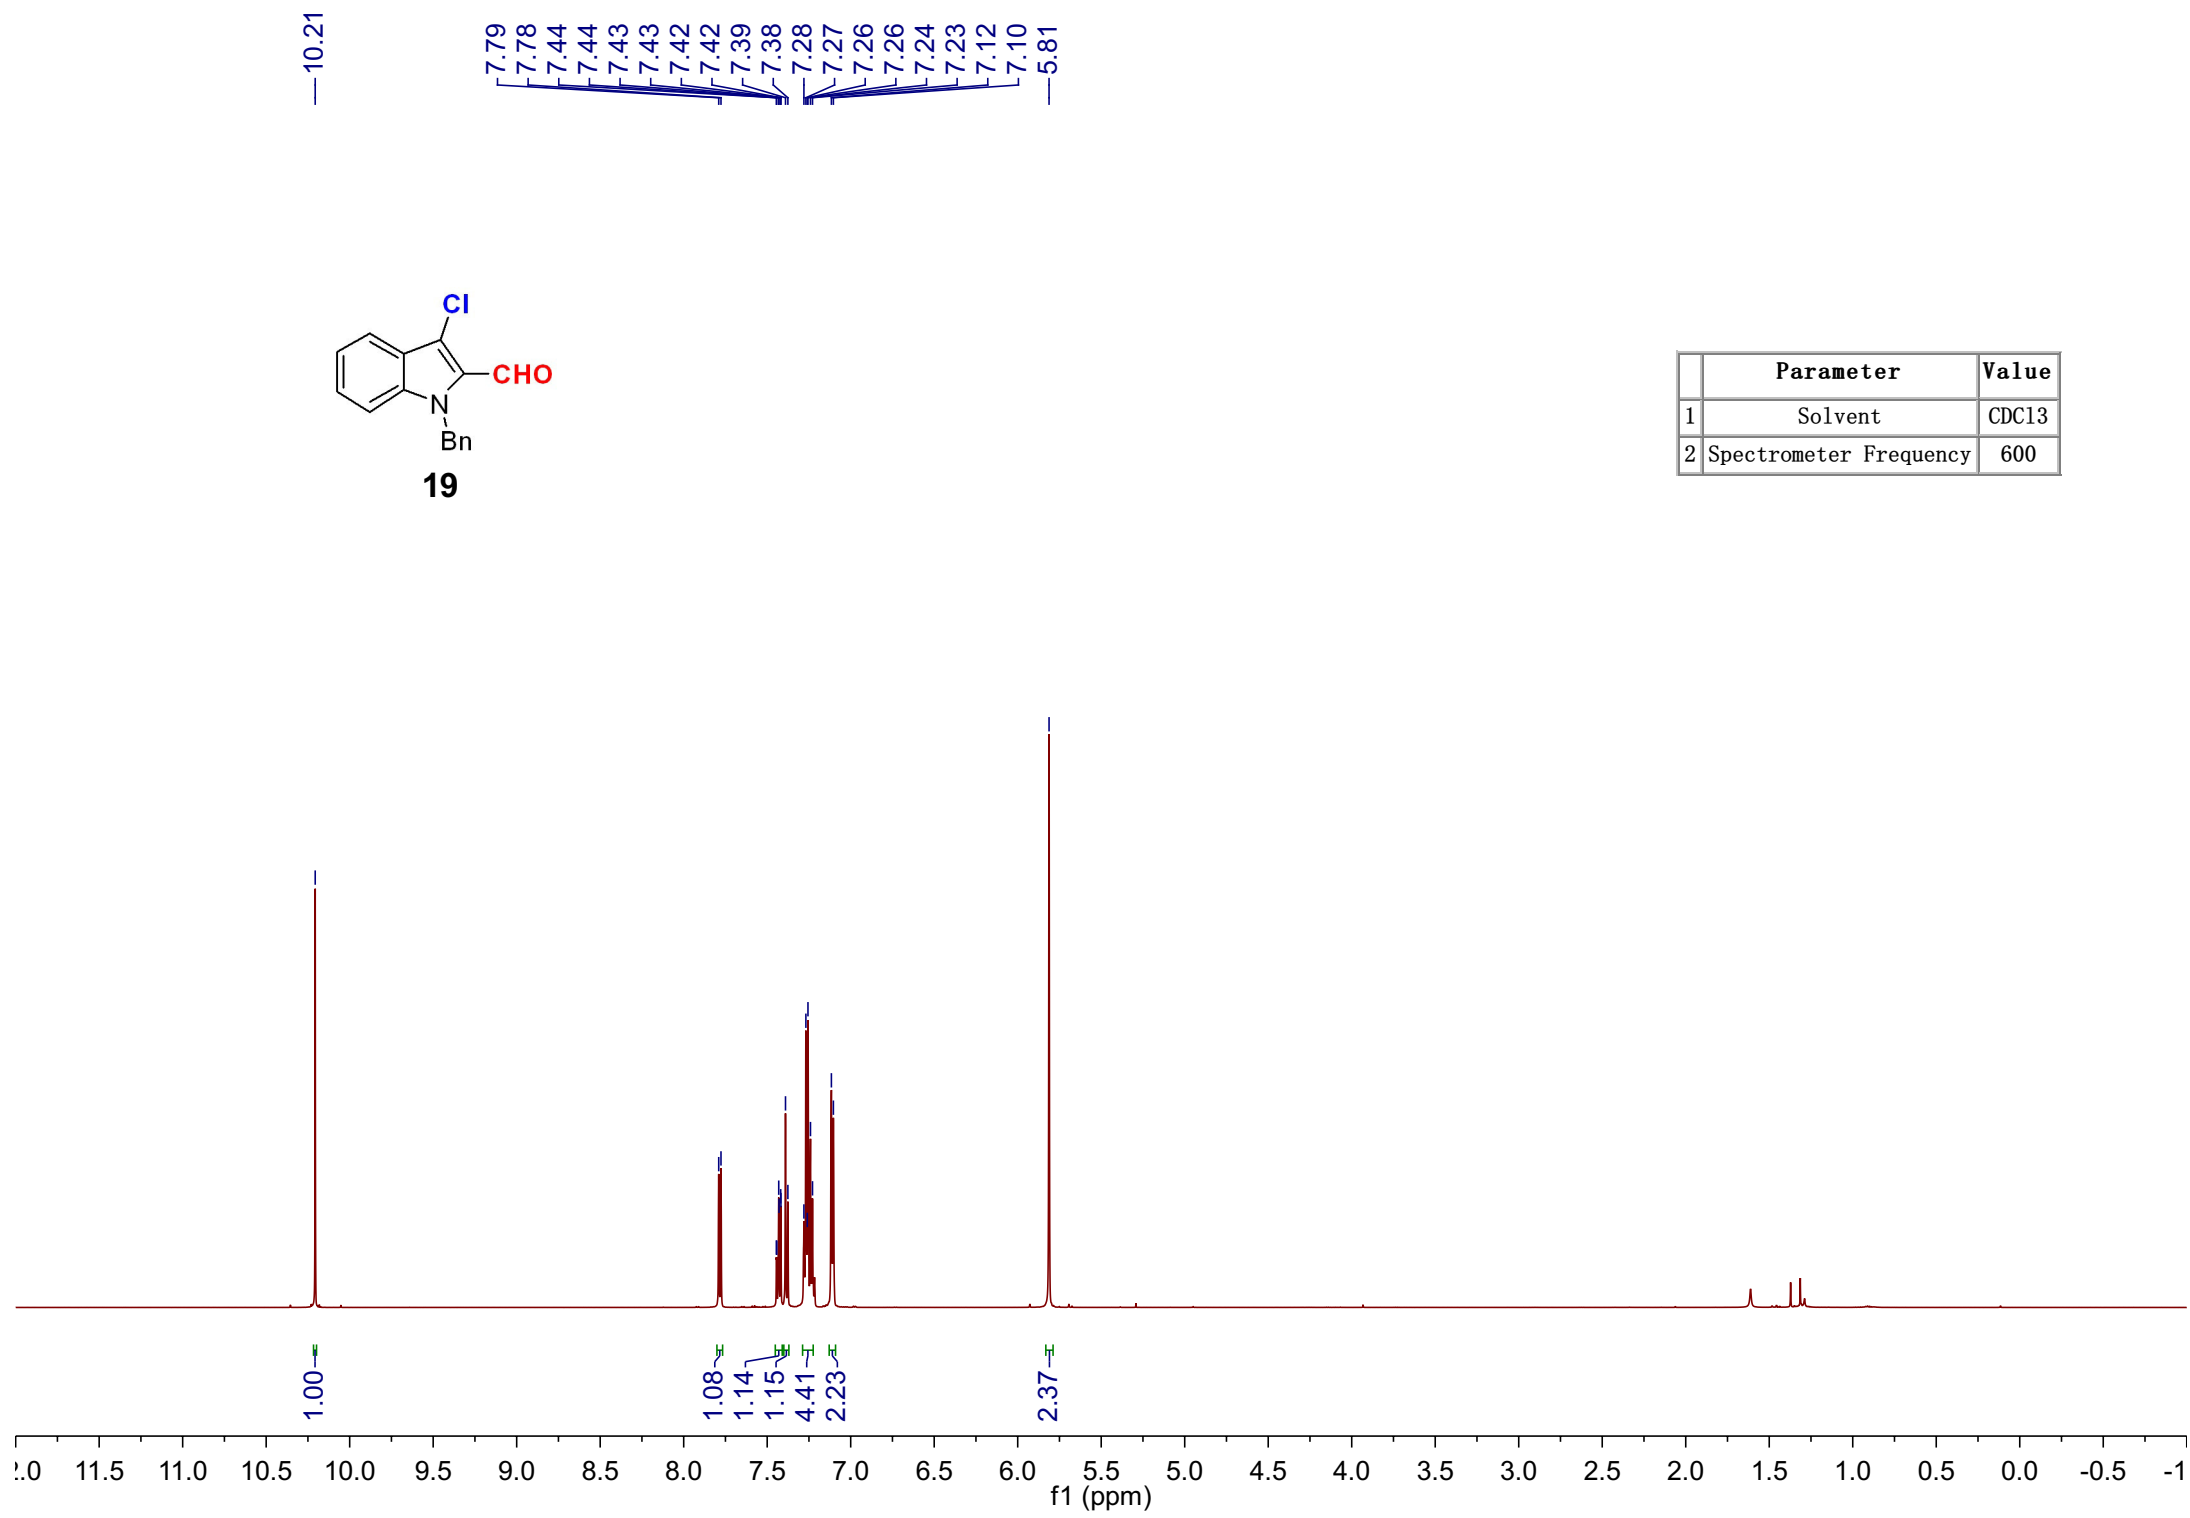

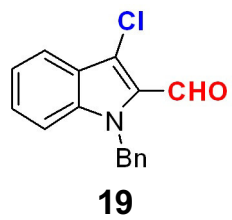

—181.08

138.64  
137.42

128.83  
128.79  
128.51  
127.65  
126.74  
121.88  
111.28

—77.16

—48.17

|   | Parameter              | Value |
|---|------------------------|-------|
| 1 | Solvent                | CDC13 |
| 2 | Spectrometer Frequency | 150   |

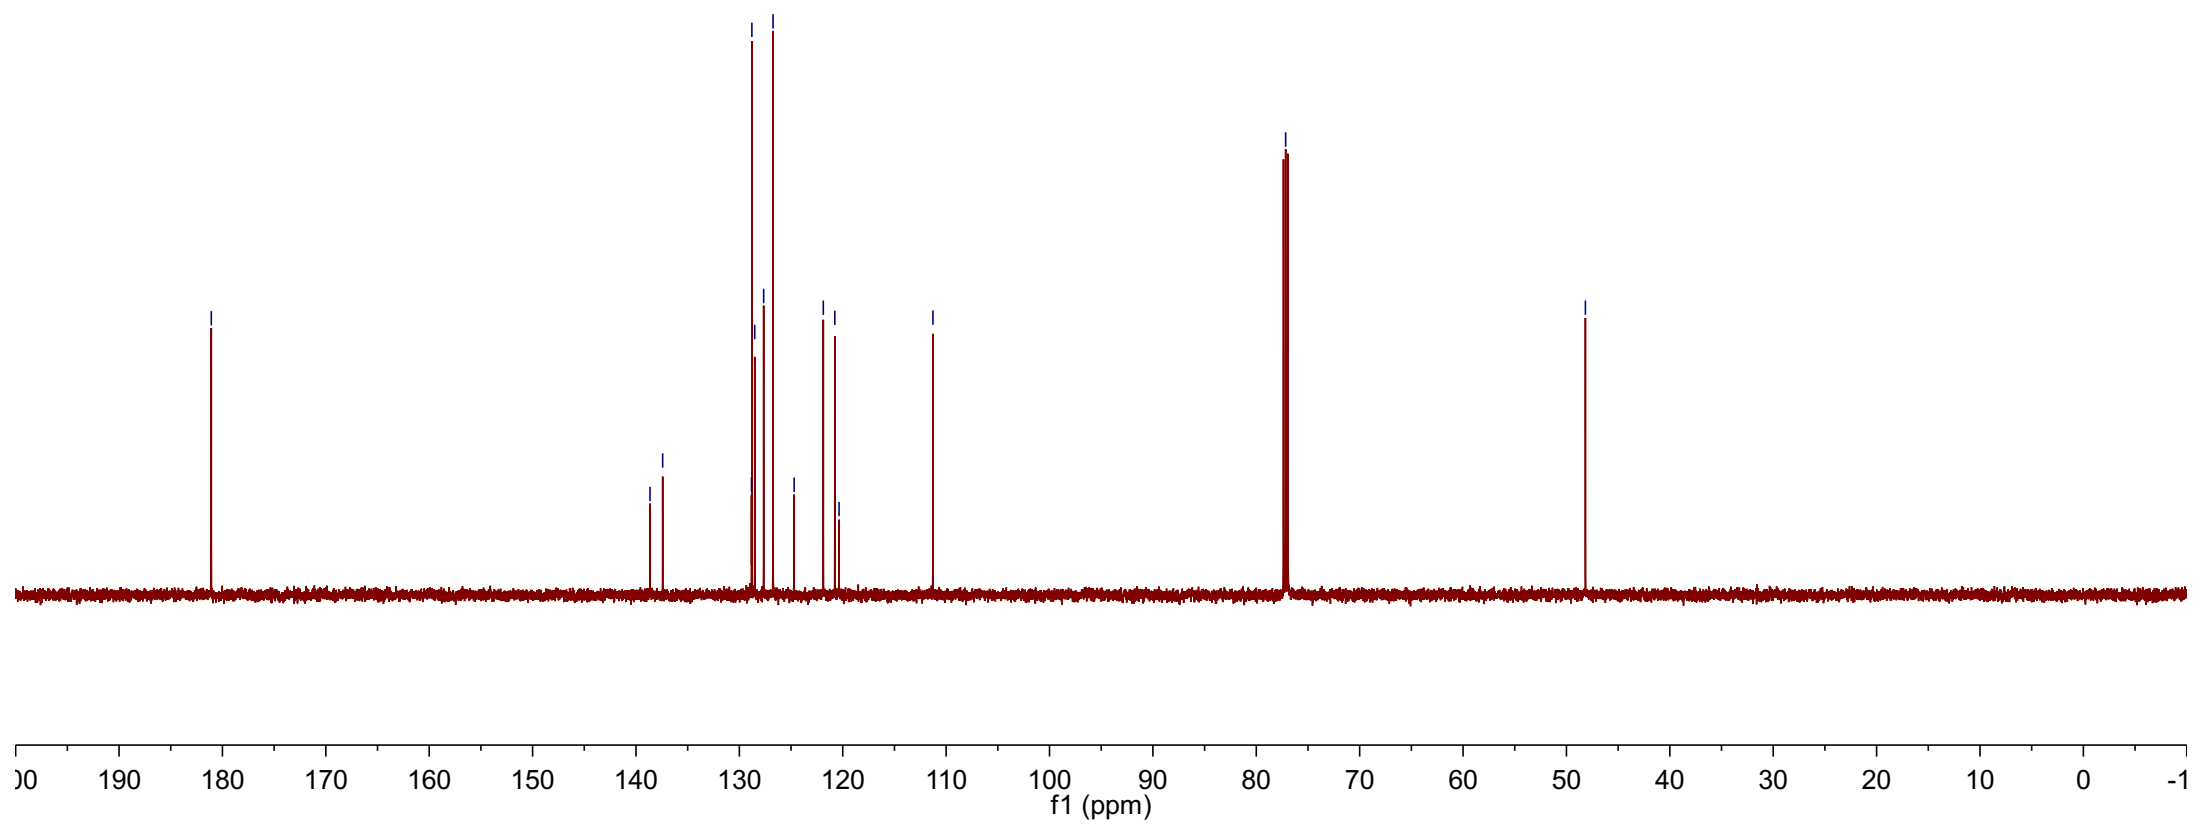

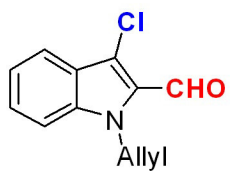

**20**

|   | Parameter              | Value |
|---|------------------------|-------|
| 1 | Solvent                | CDC13 |
| 2 | Spectrometer Frequency | 600   |

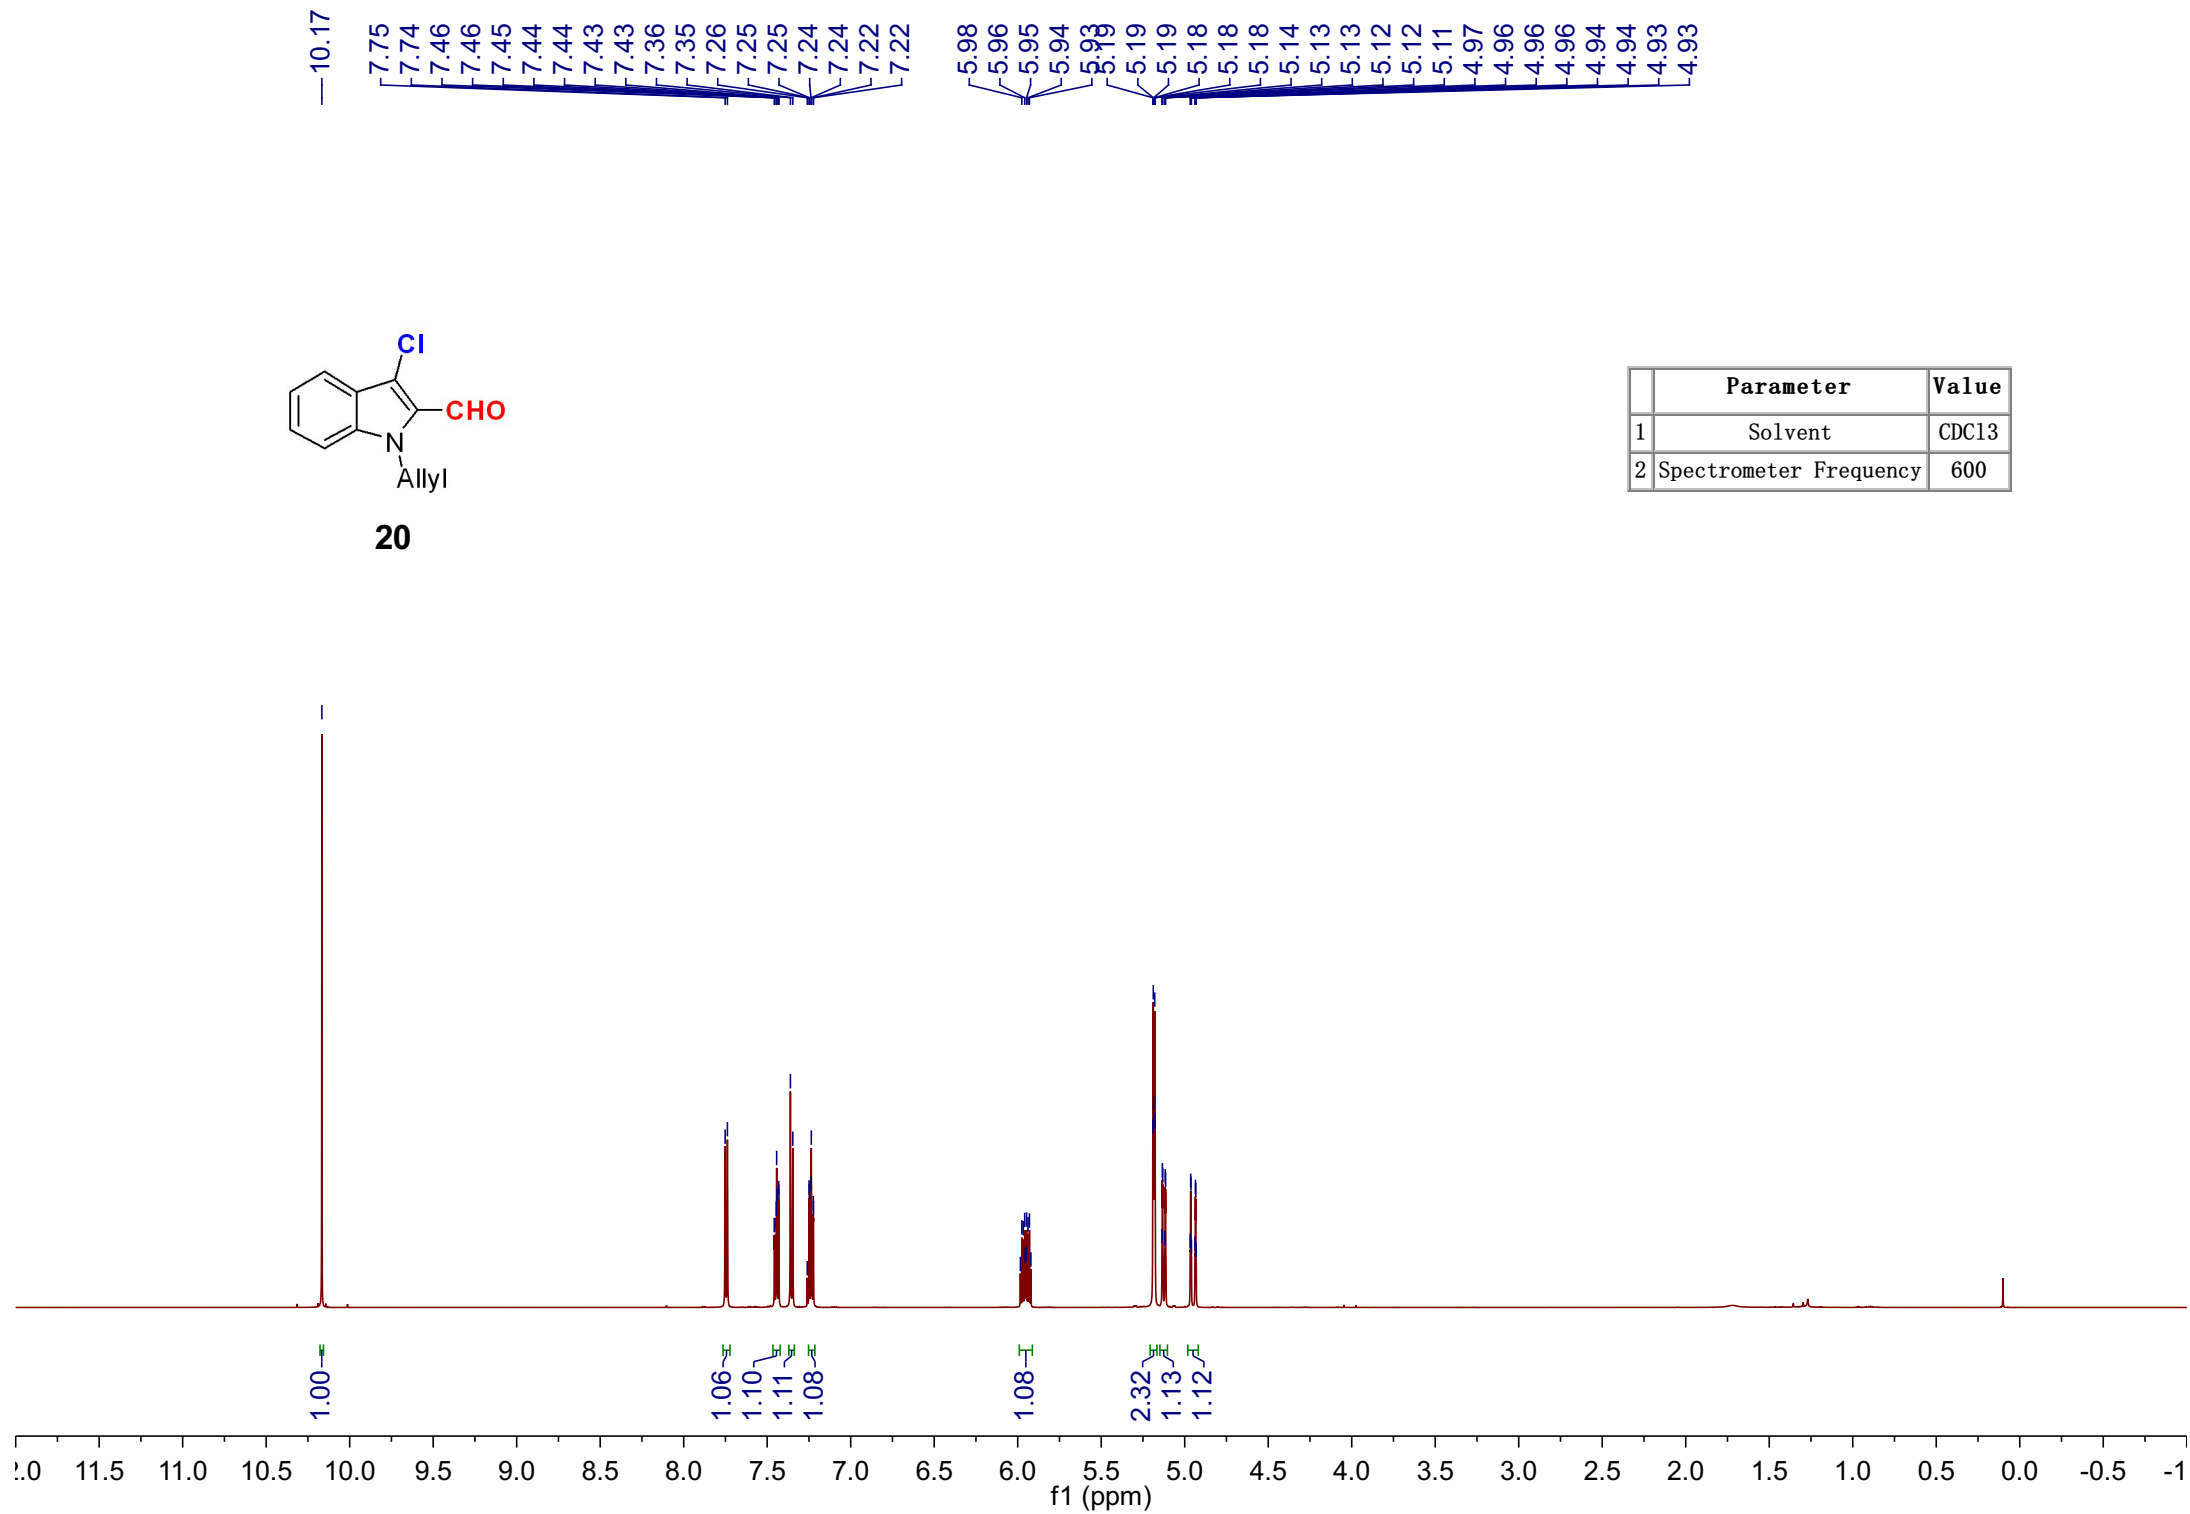



20

—180.95

—138.29  
—133.16  
—128.63  
—128.30  
—124.55  
—121.74  
—120.69  
—119.95  
—116.82  
—111.03

—77.16

—47.01

|   | Parameter              | Value             |
|---|------------------------|-------------------|
| 1 | Solvent                | CDCl <sub>3</sub> |
| 2 | Spectrometer Frequency | 150               |

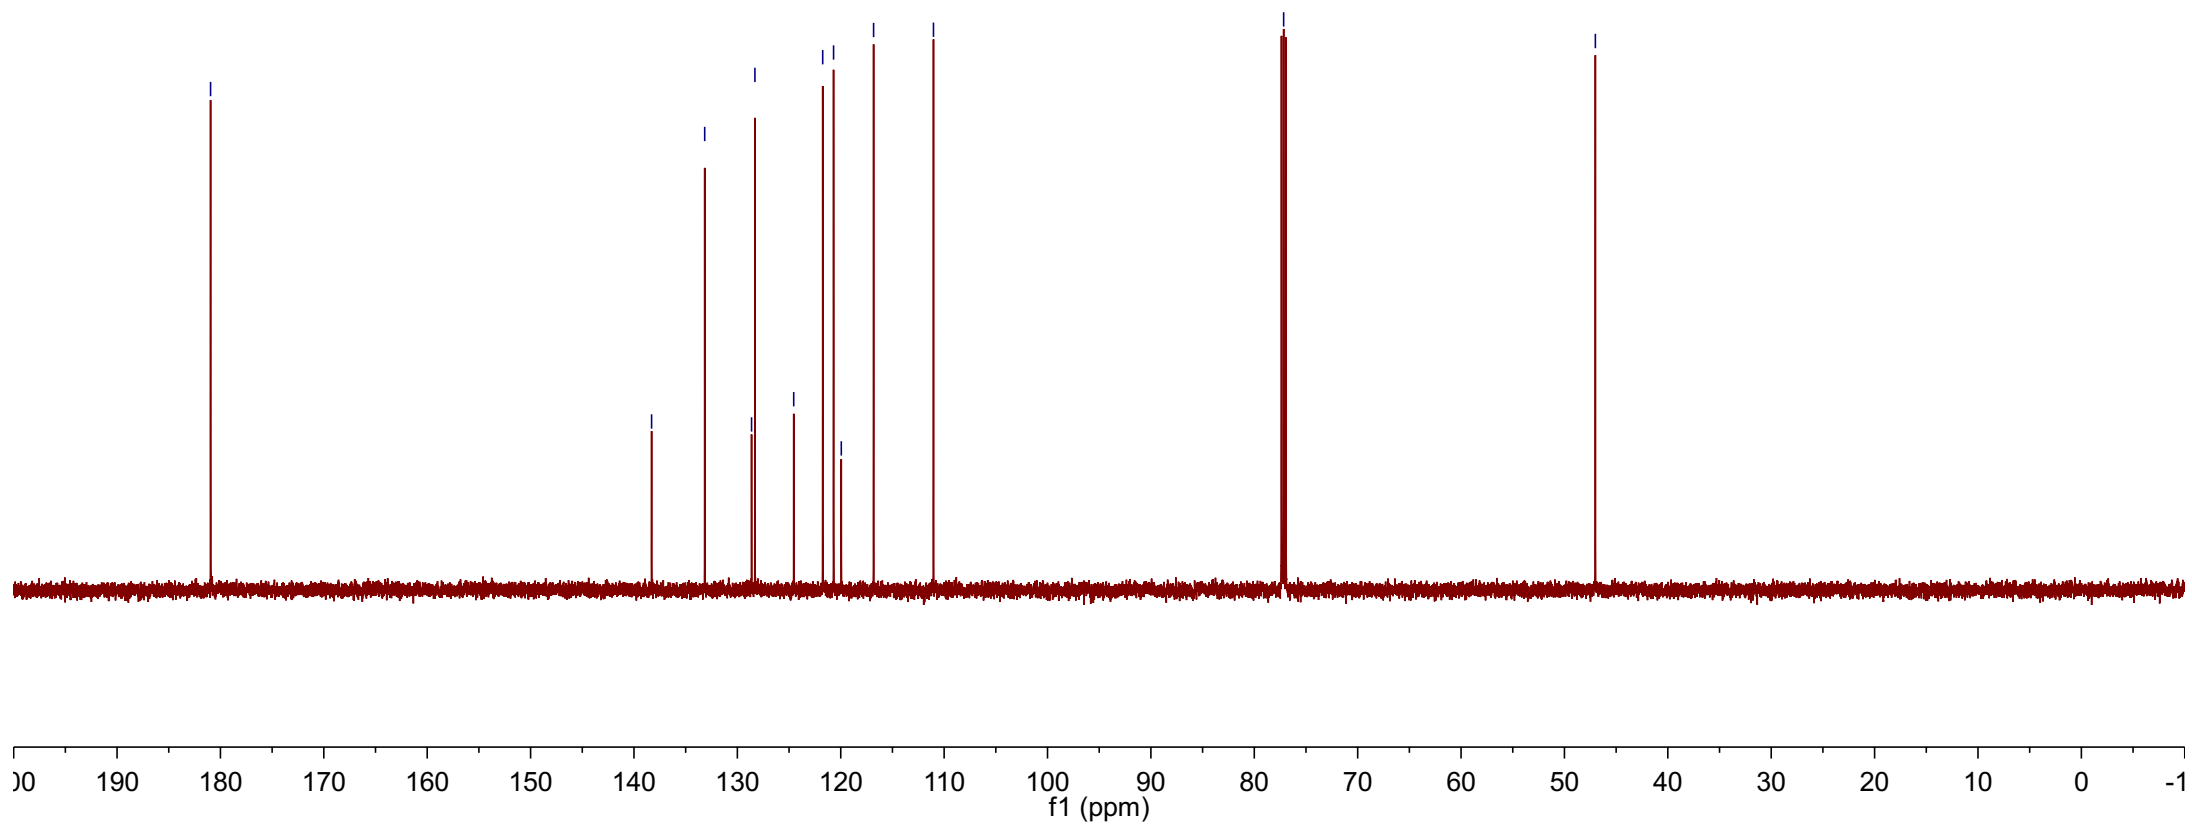

—10.17

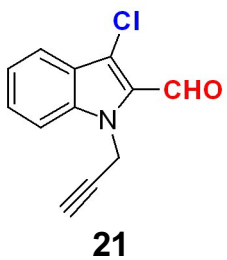

7.77  
7.76  
7.52  
7.51  
7.30  
7.29  
7.28  
7.28  
7.27  
7.26

5.43  
5.43

—2.28

|   | Parameter              | Value |
|---|------------------------|-------|
| 1 | Solvent                | CDC13 |
| 2 | Spectrometer Frequency | 600   |

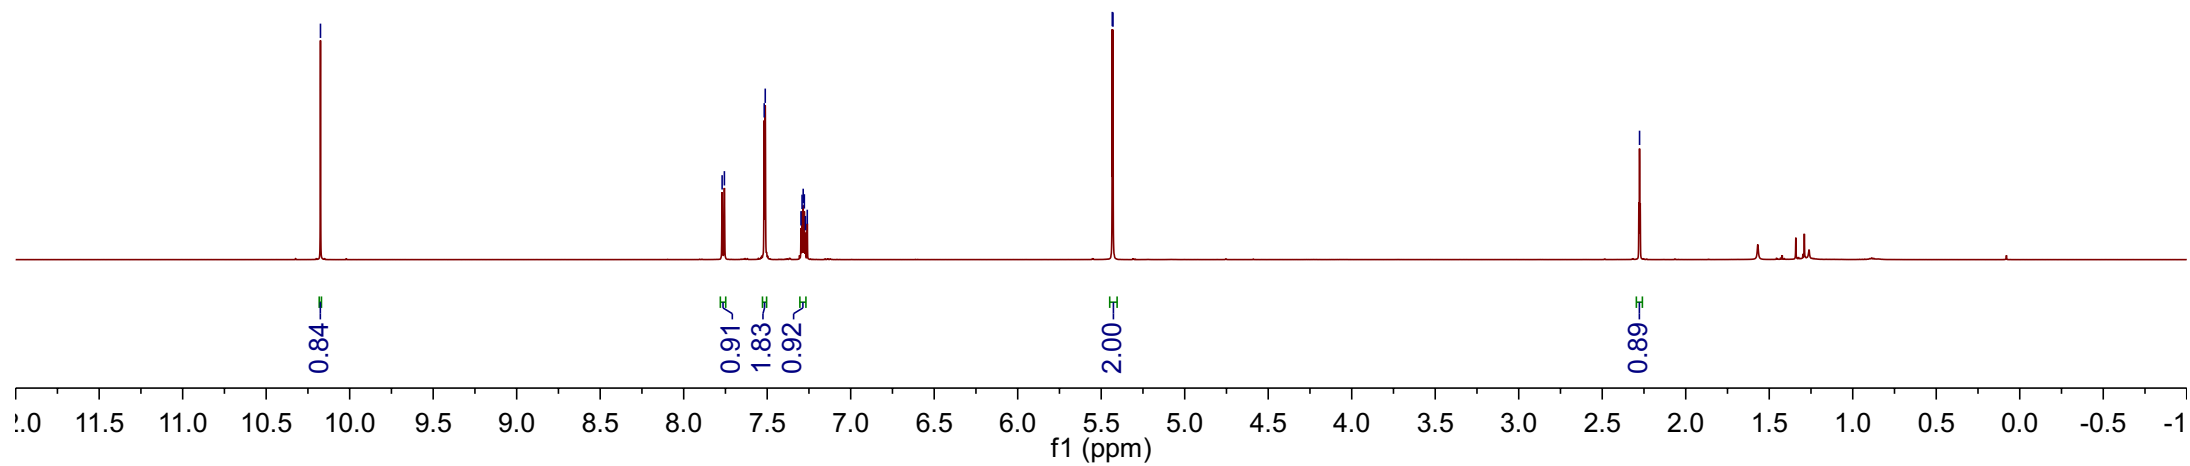

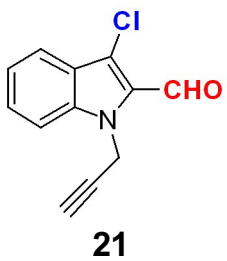

—181.03

—138.01

128.61

128.02

124.78

122.10

120.89

120.78

—110.93

—77.85

—72.80

—34.03

|   | Parameter              | Value |
|---|------------------------|-------|
| 1 | Solvent                | CDC13 |
| 2 | Spectrometer Frequency | 150   |



—10.18

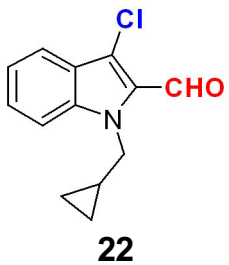

7.75  
7.74  
7.46  
7.46  
7.45  
7.45  
7.44  
7.43  
7.43  
7.41  
7.39  
7.26  
7.24  
7.24  
7.23  
7.21  
7.21

4.48  
4.46

1.30  
1.29  
1.29  
1.28  
1.27  
1.27  
1.27  
0.50  
0.49  
0.49  
0.48  
0.48  
0.47  
0.47  
0.42  
0.41  
0.41

|   | Parameter              | Value |
|---|------------------------|-------|
| 1 | Solvent                | CDC13 |
| 2 | Spectrometer Frequency | 600   |

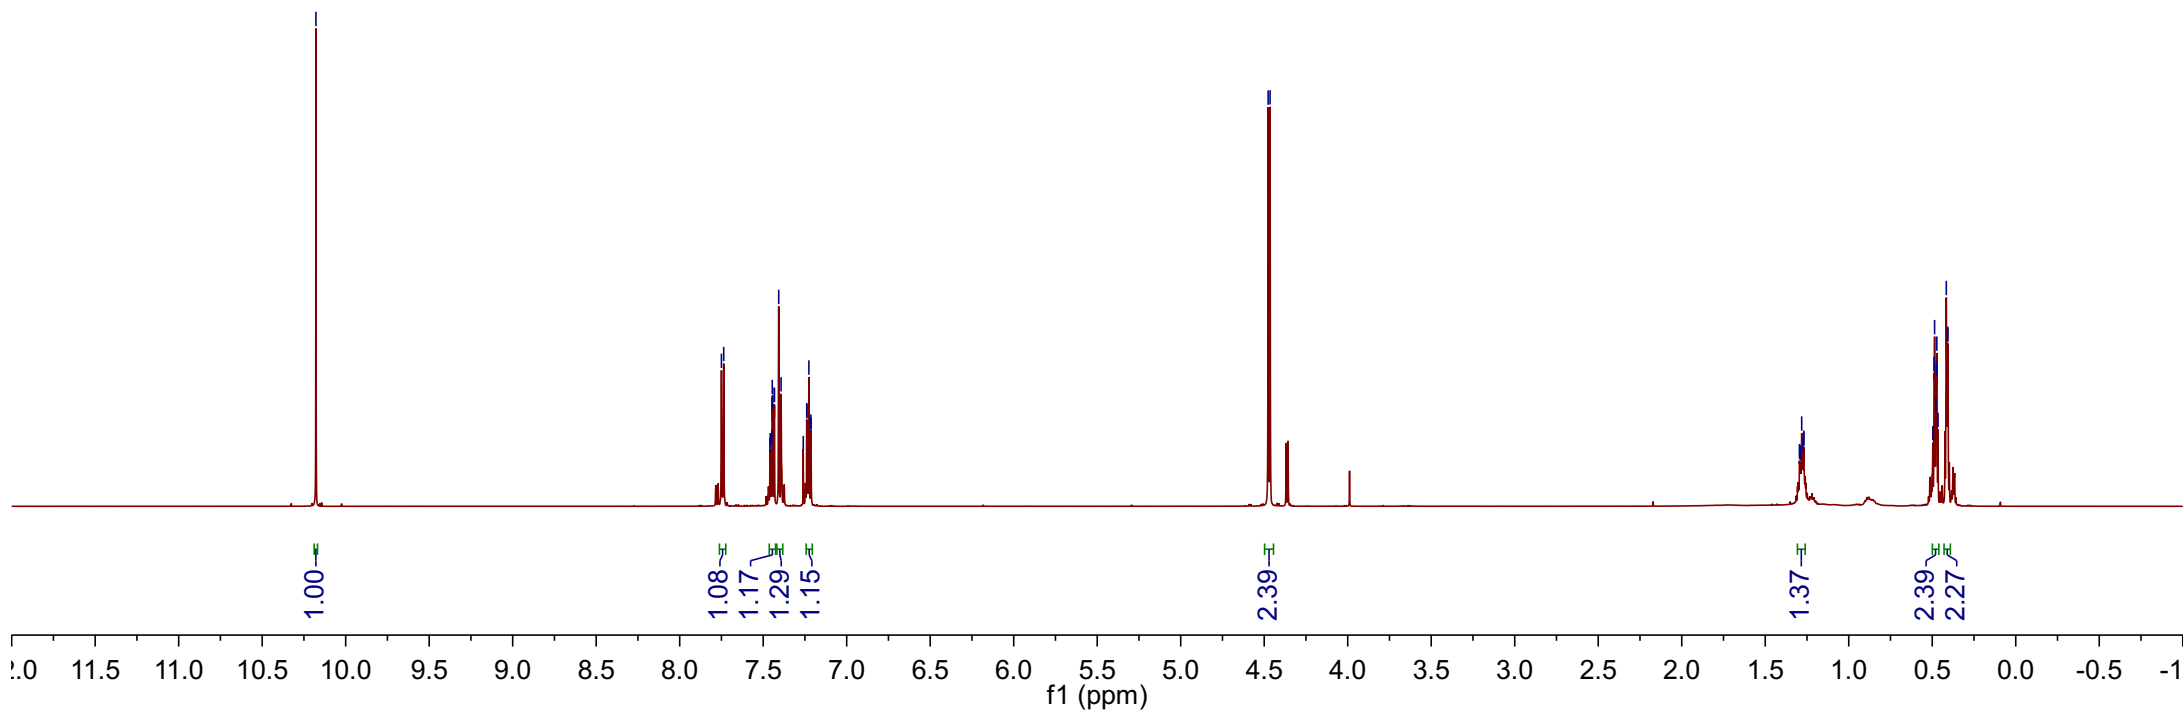

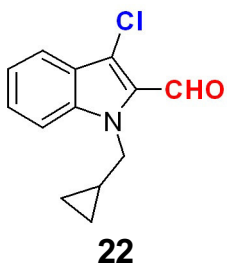

|   | Parameter              | Value |
|---|------------------------|-------|
| 1 | Solvent                | CDC13 |
| 2 | Spectrometer Frequency | 150   |

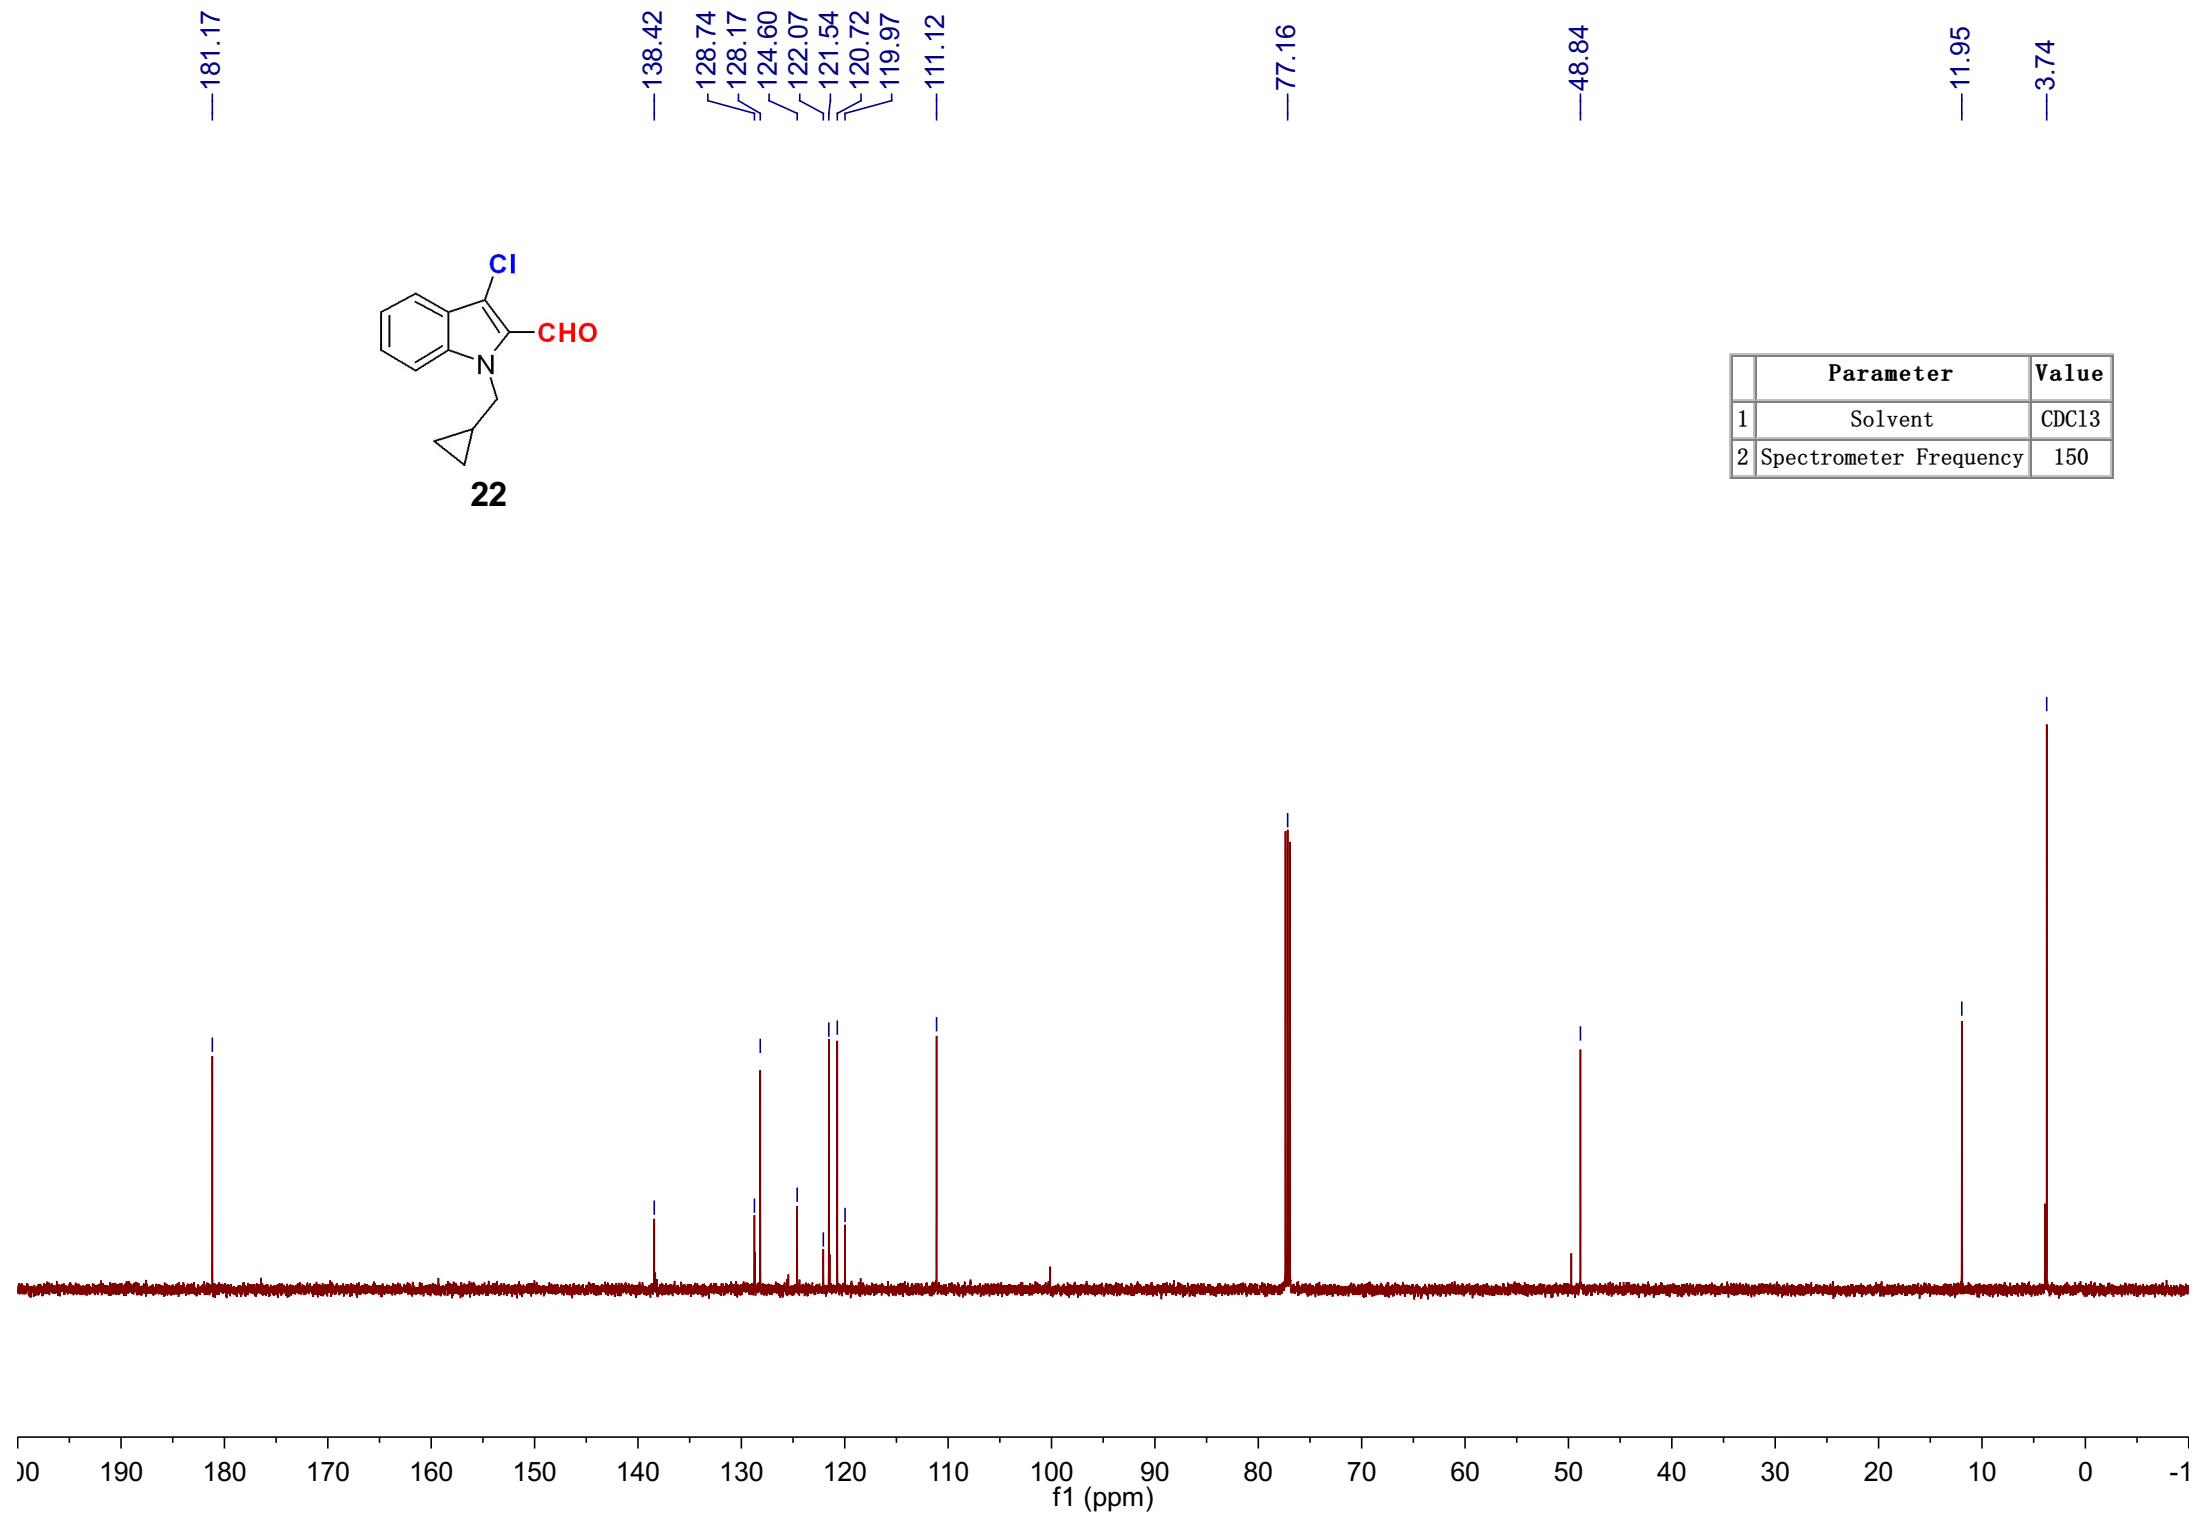



—10.13

7.77  
7.76  
7.49  
7.47  
7.47  
7.46  
7.28  
7.27  
7.26

—5.30

—3.75

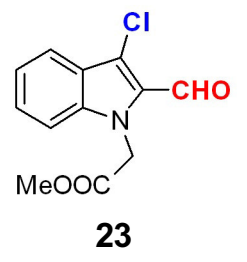

|   | Parameter              | Value |
|---|------------------------|-------|
| 1 | Solvent                | CDC13 |
| 2 | Spectrometer Frequency | 600   |

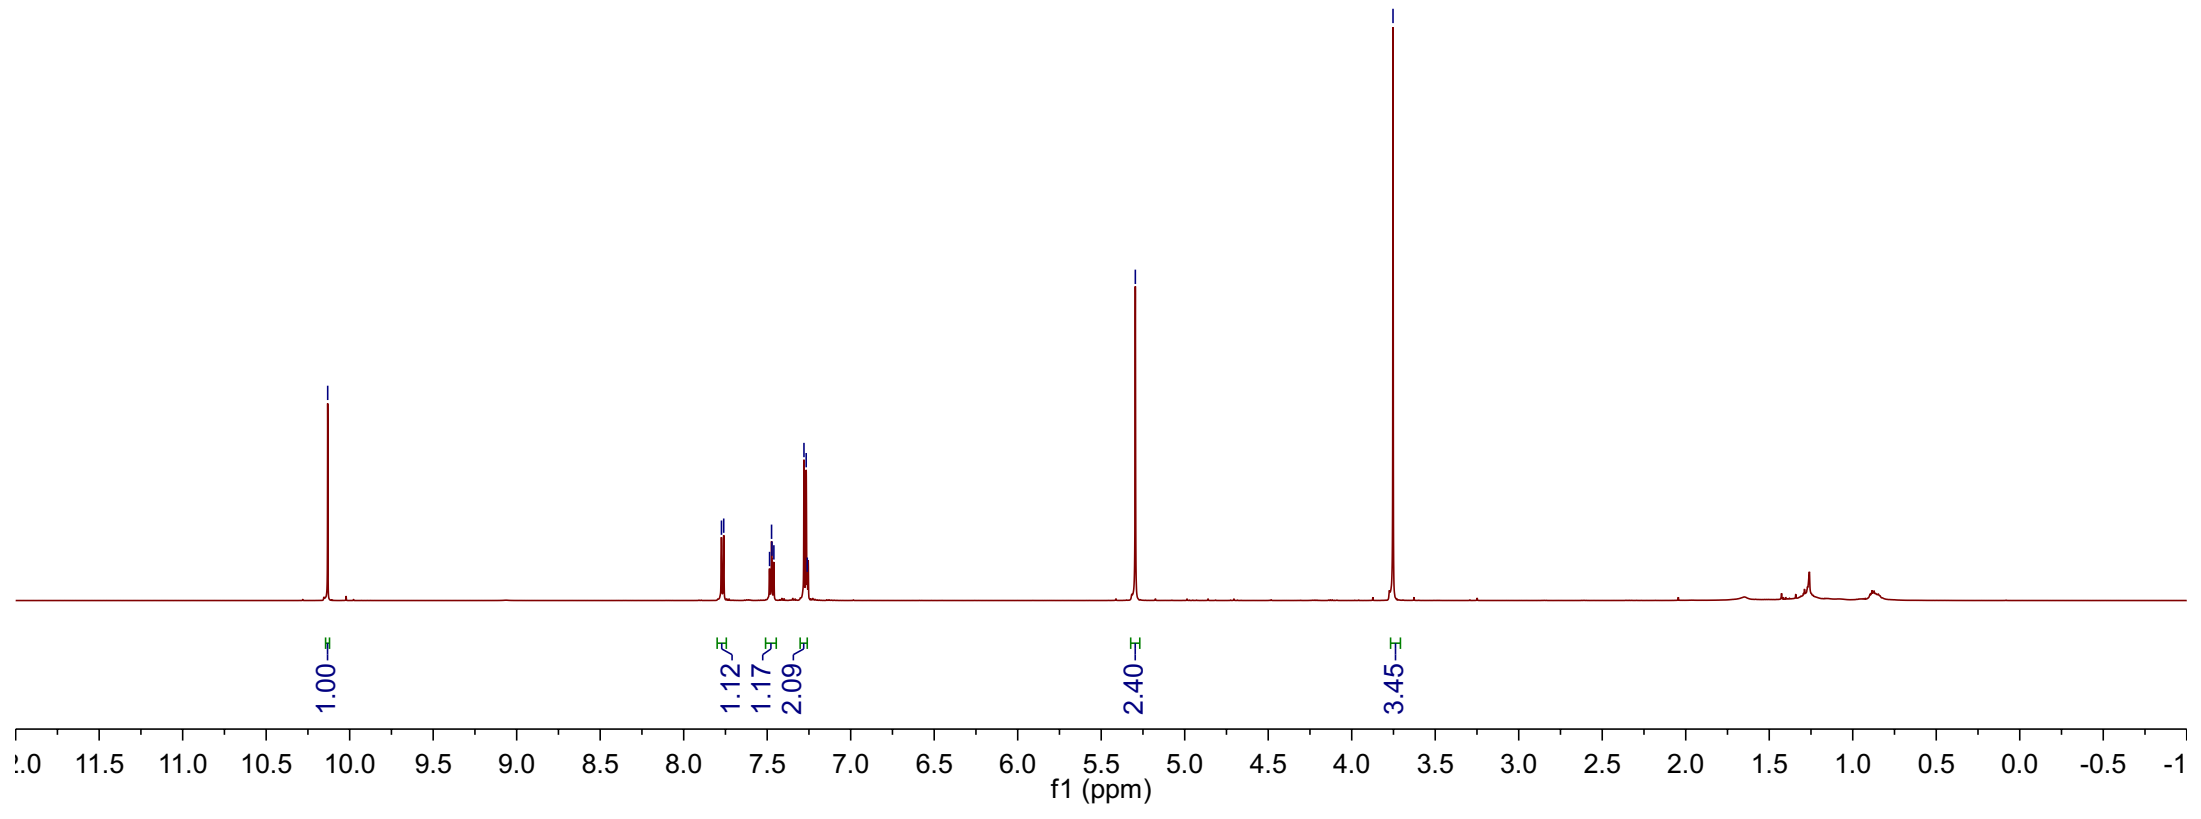

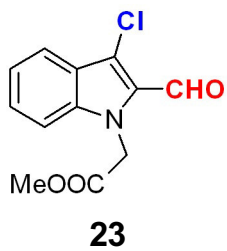

|   | Parameter              | Value |
|---|------------------------|-------|
| 1 | Solvent                | CDC13 |
| 2 | Spectrometer Frequency | 150   |

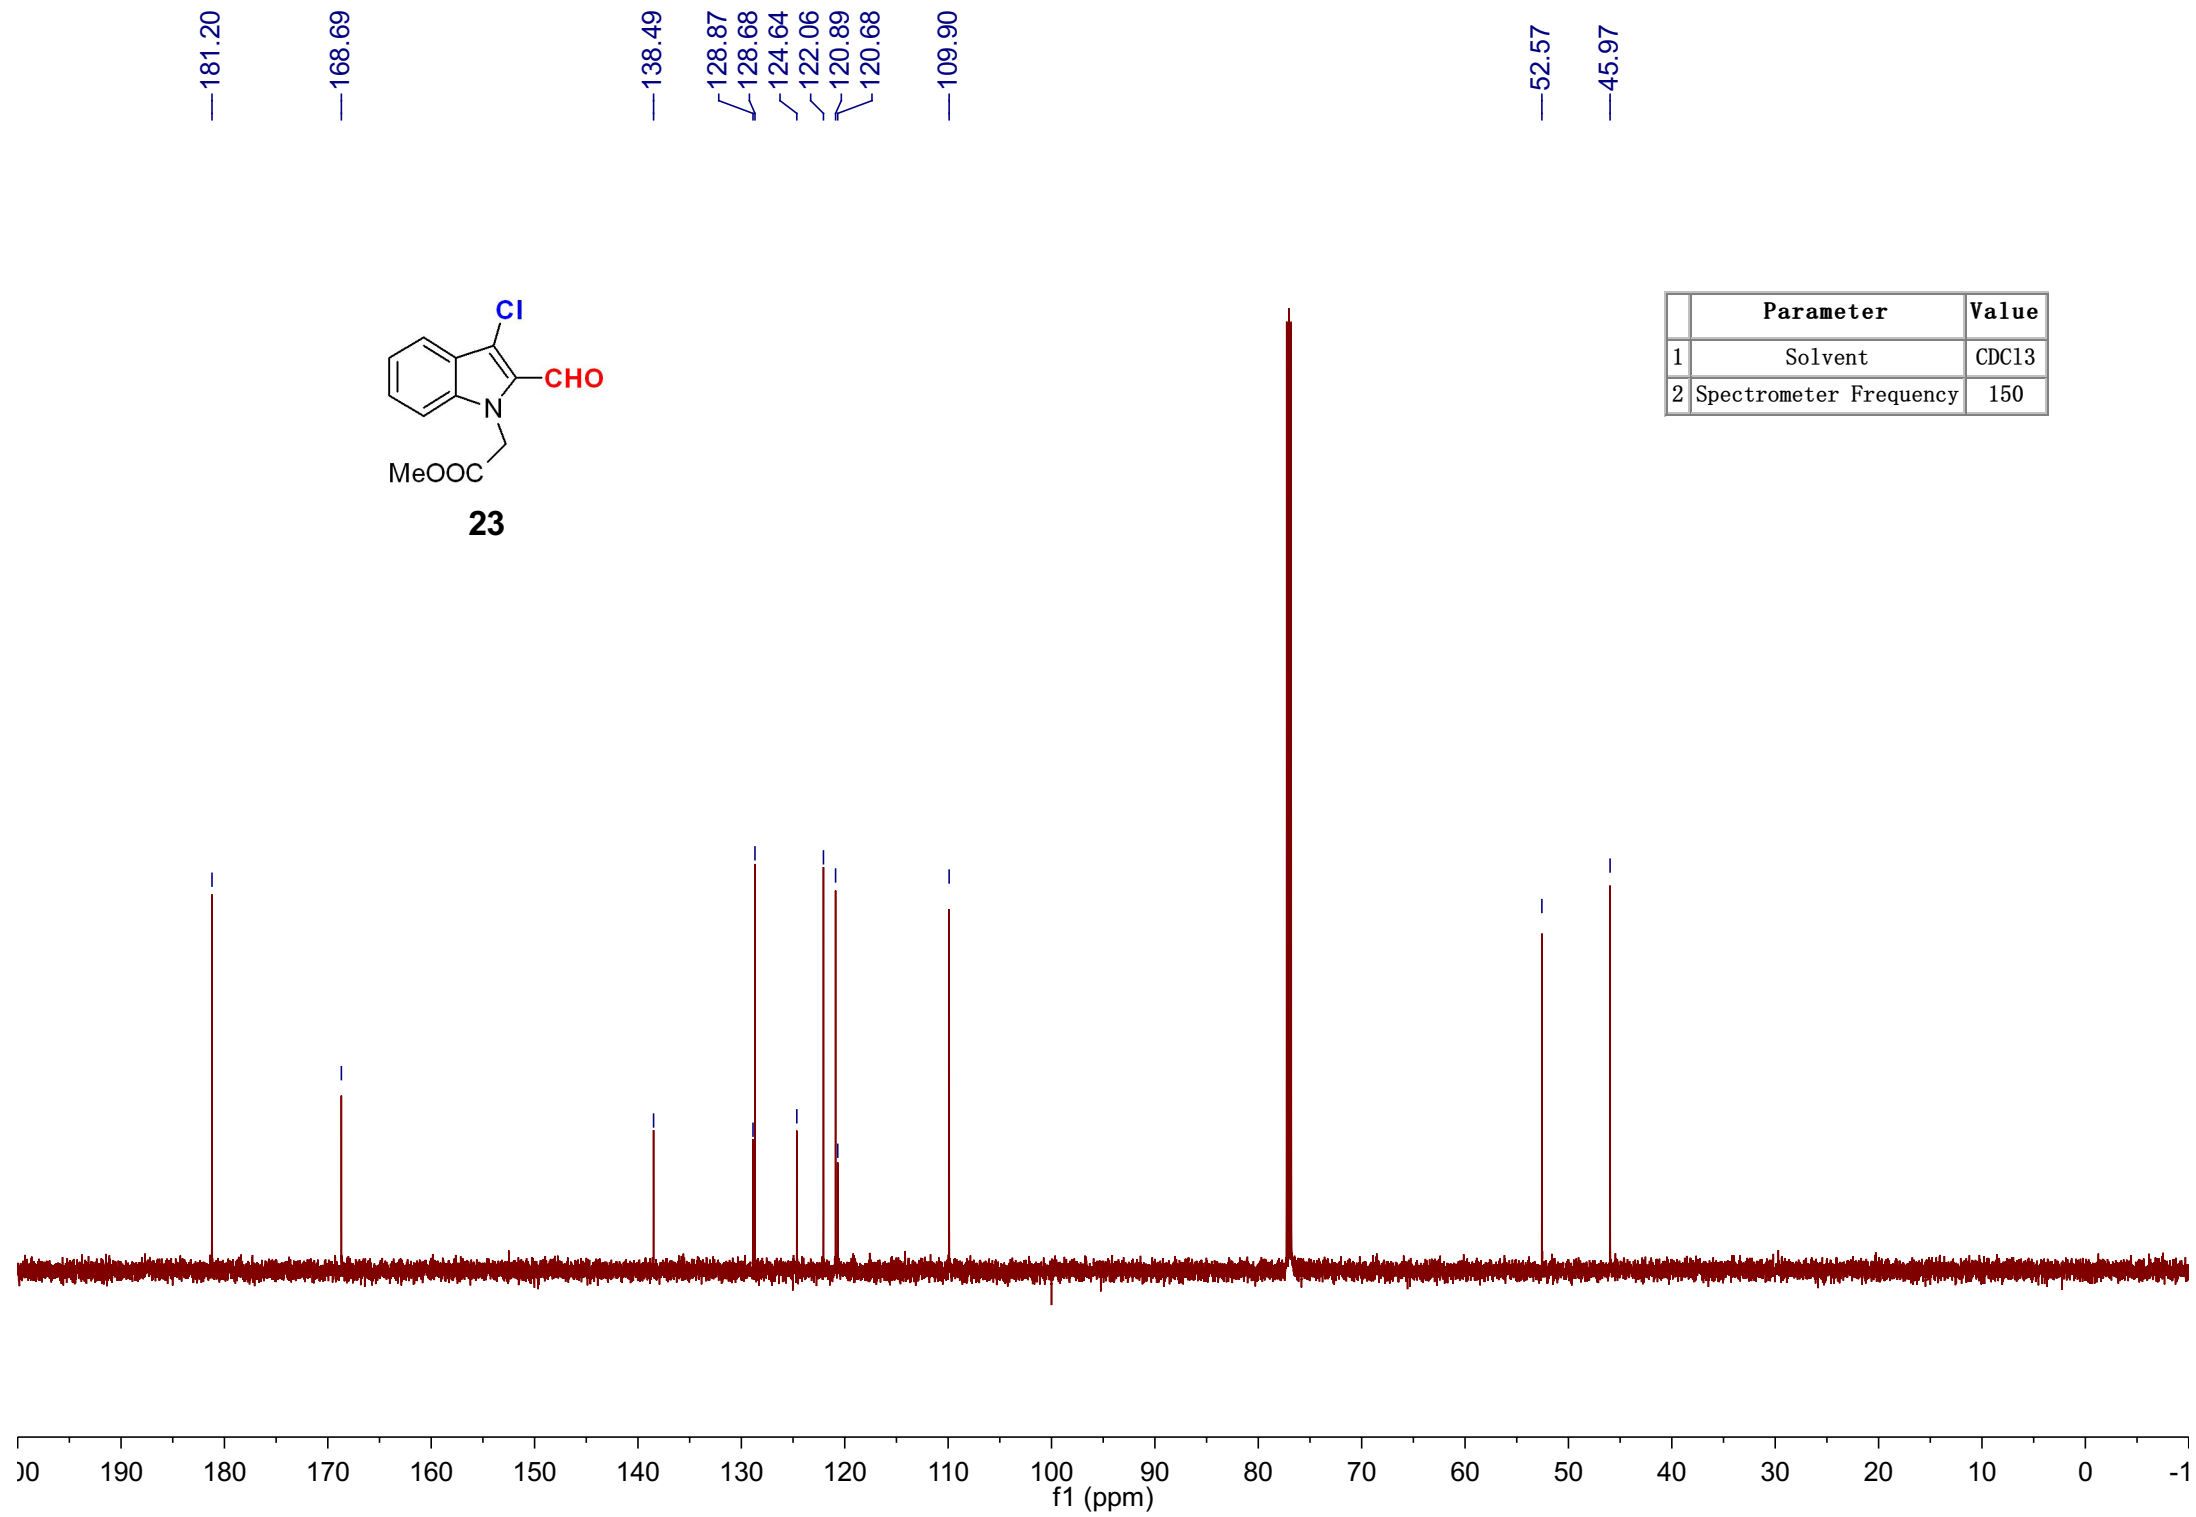

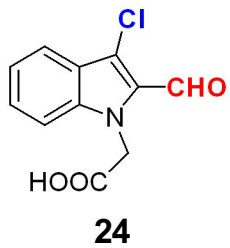

|   | Parameter              | Value |
|---|------------------------|-------|
| 1 | Solvent                | DMSO  |
| 2 | Spectrometer Frequency | 600   |

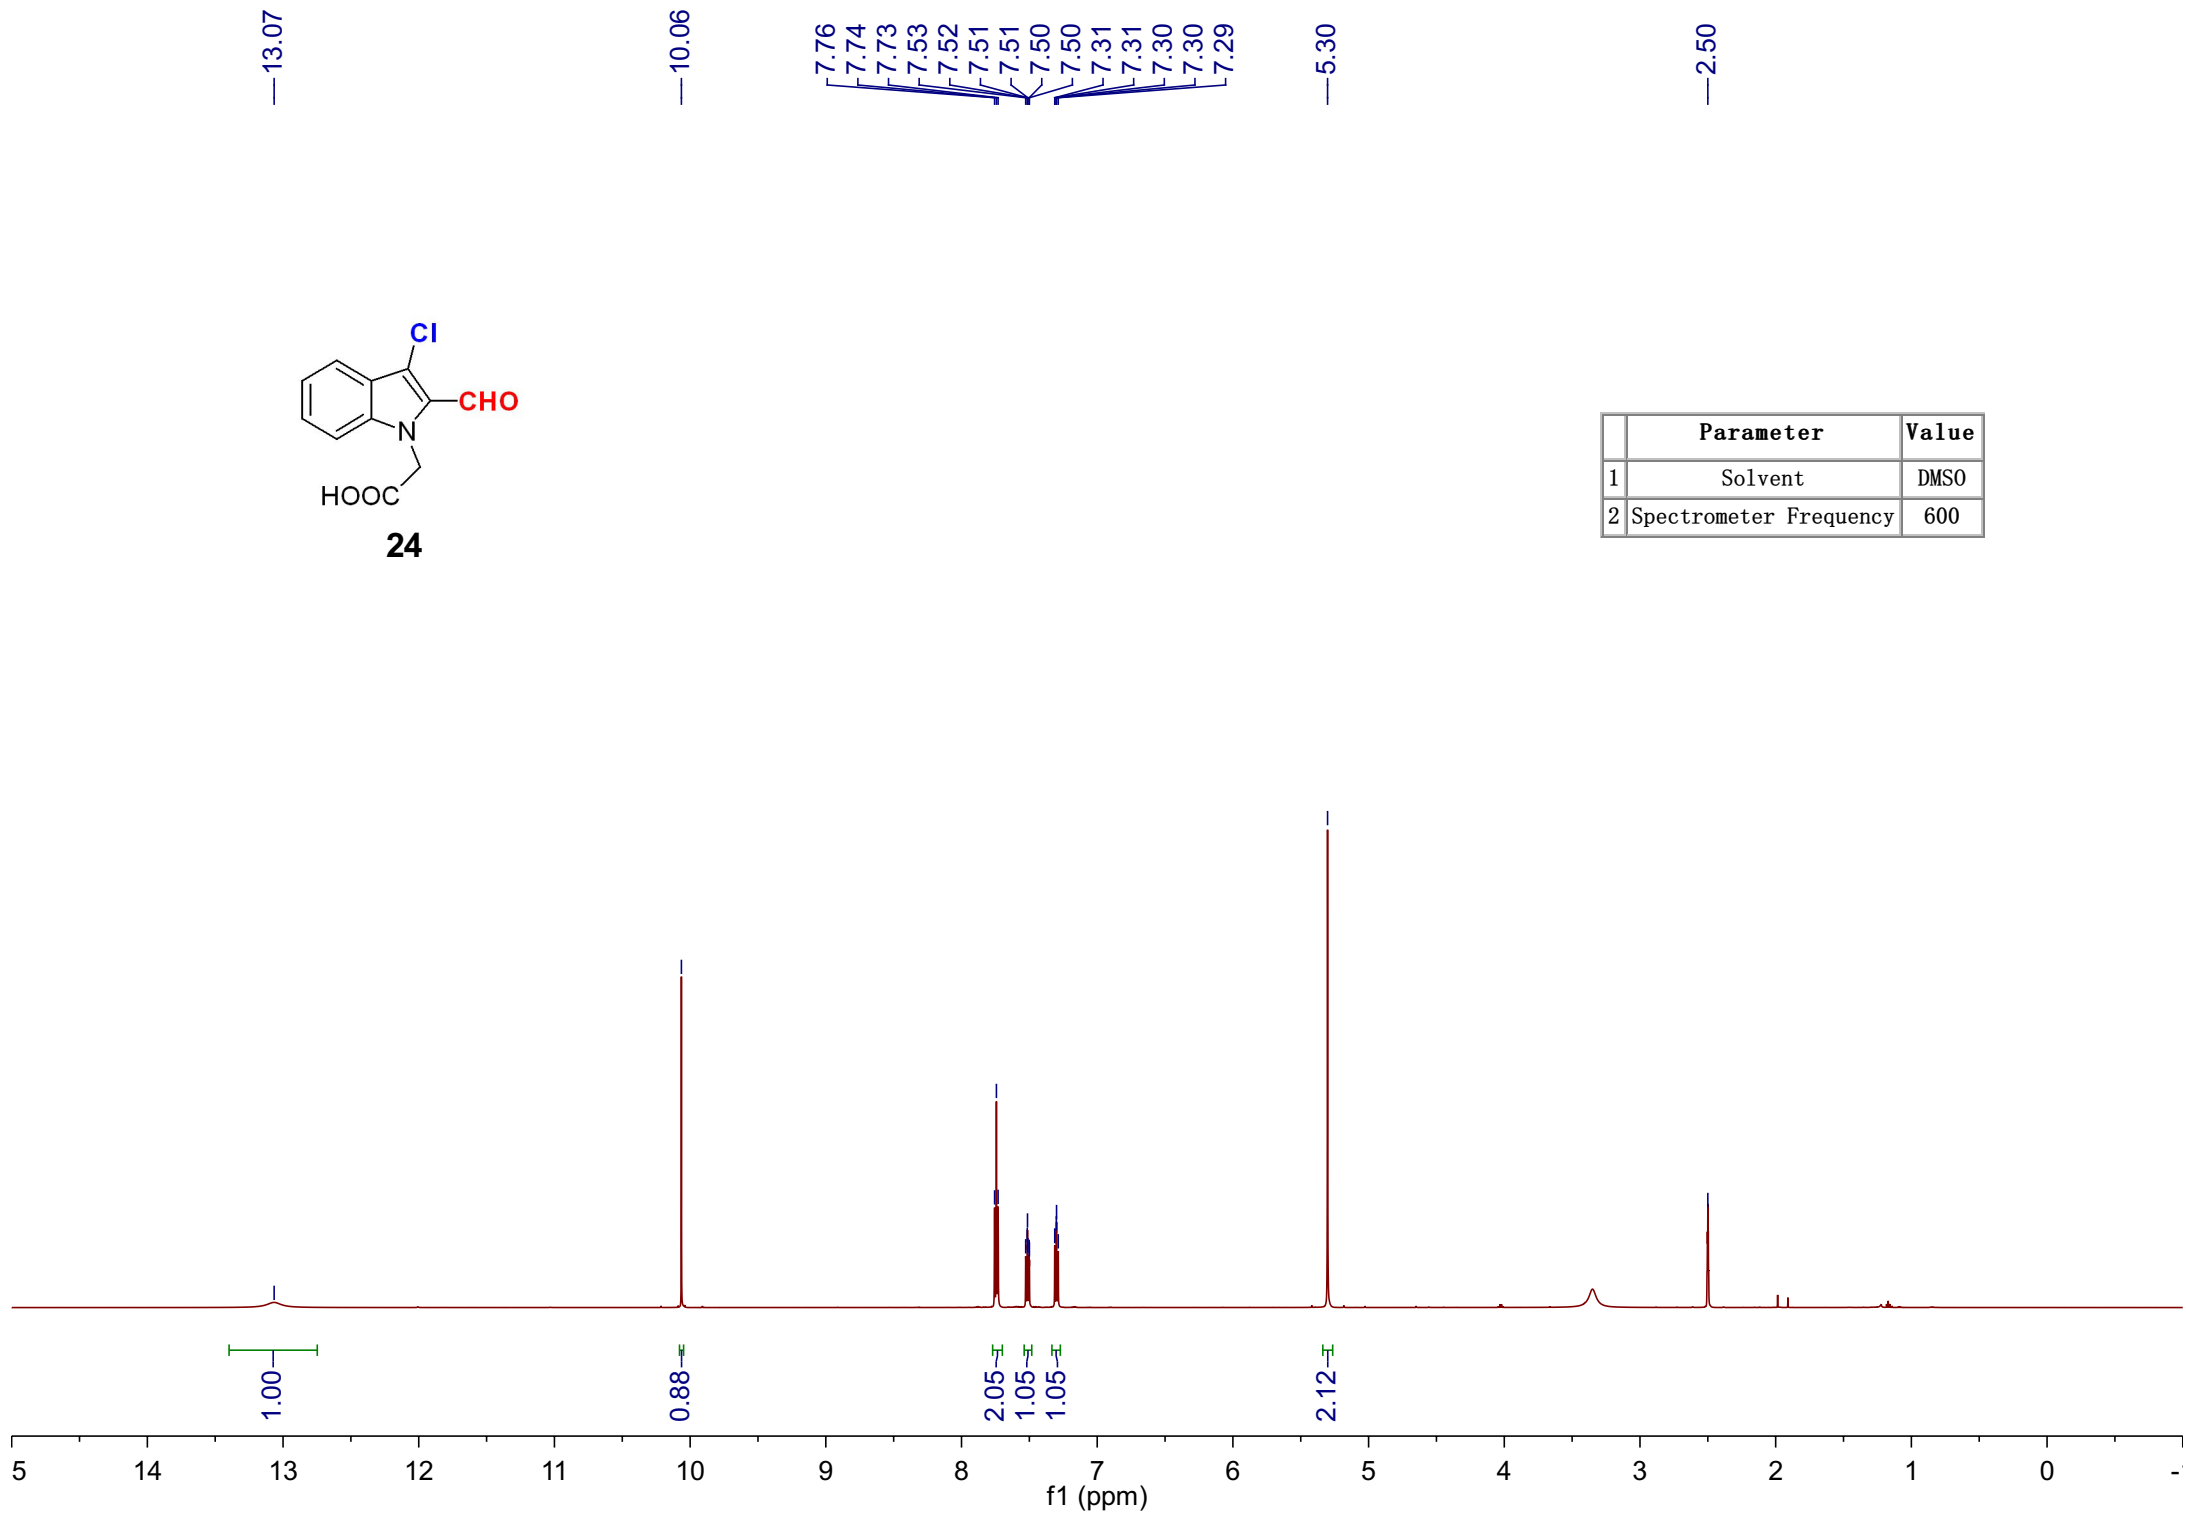



—181.07  
—169.82  
—138.24  
128.76  
128.32  
123.40  
122.08  
119.73  
117.62  
—111.56

—46.18  
—39.52

|   | Parameter              | Value |
|---|------------------------|-------|
| 1 | Solvent                | DMSO  |
| 2 | Spectrometer Frequency | 150   |



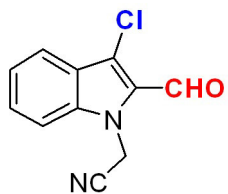

**25**

—10.16

7.81  
7.80  
7.61  
7.60  
7.59  
7.59  
7.59  
7.58  
7.58  
7.46  
7.44  
7.37  
7.37  
7.36  
7.35  
7.34  
7.26

—5.60

|   | Parameter              | Value |
|---|------------------------|-------|
| 1 | Solvent                | CDC13 |
| 2 | Spectrometer Frequency | 600   |

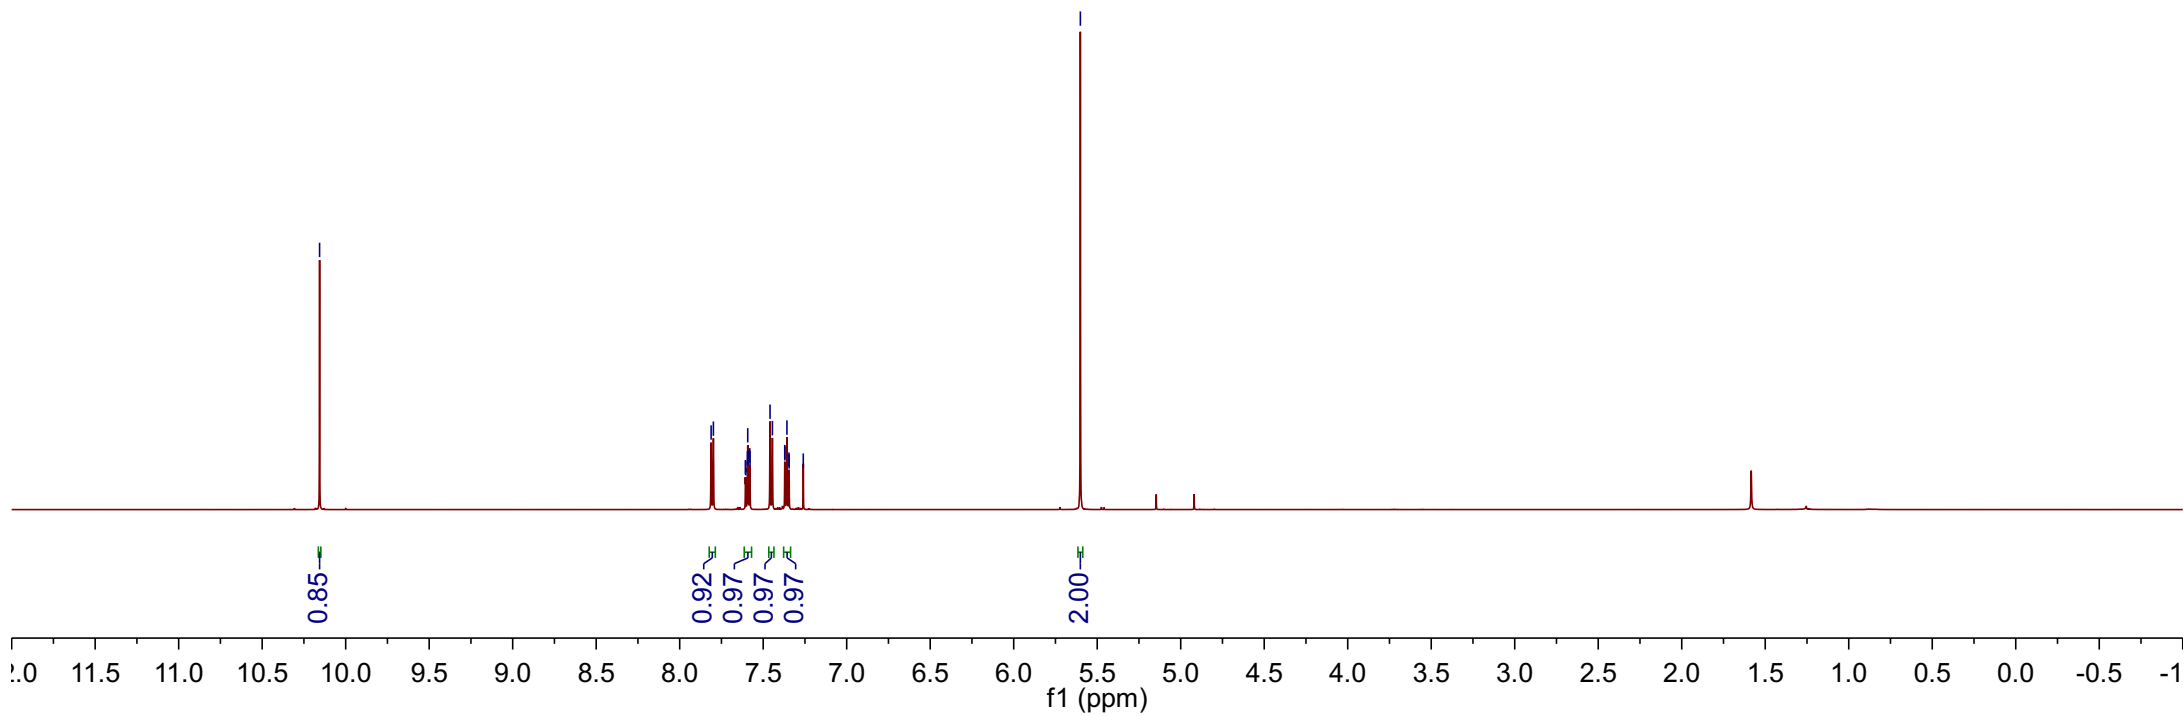

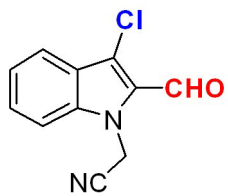

**25**

—181.26

—137.94

—129.79

—127.88

—125.14

—123.14

—122.58

—121.44

—114.34

—110.07

—77.16

—32.52

|   | Parameter              | Value |
|---|------------------------|-------|
| 1 | Solvent                | CDC13 |
| 2 | Spectrometer Frequency | 150   |



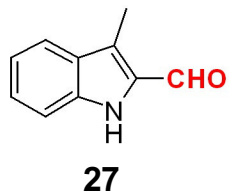

|   | Parameter              | Value |
|---|------------------------|-------|
| 1 | Solvent                | CDC13 |
| 2 | Spectrometer Frequency | 600   |

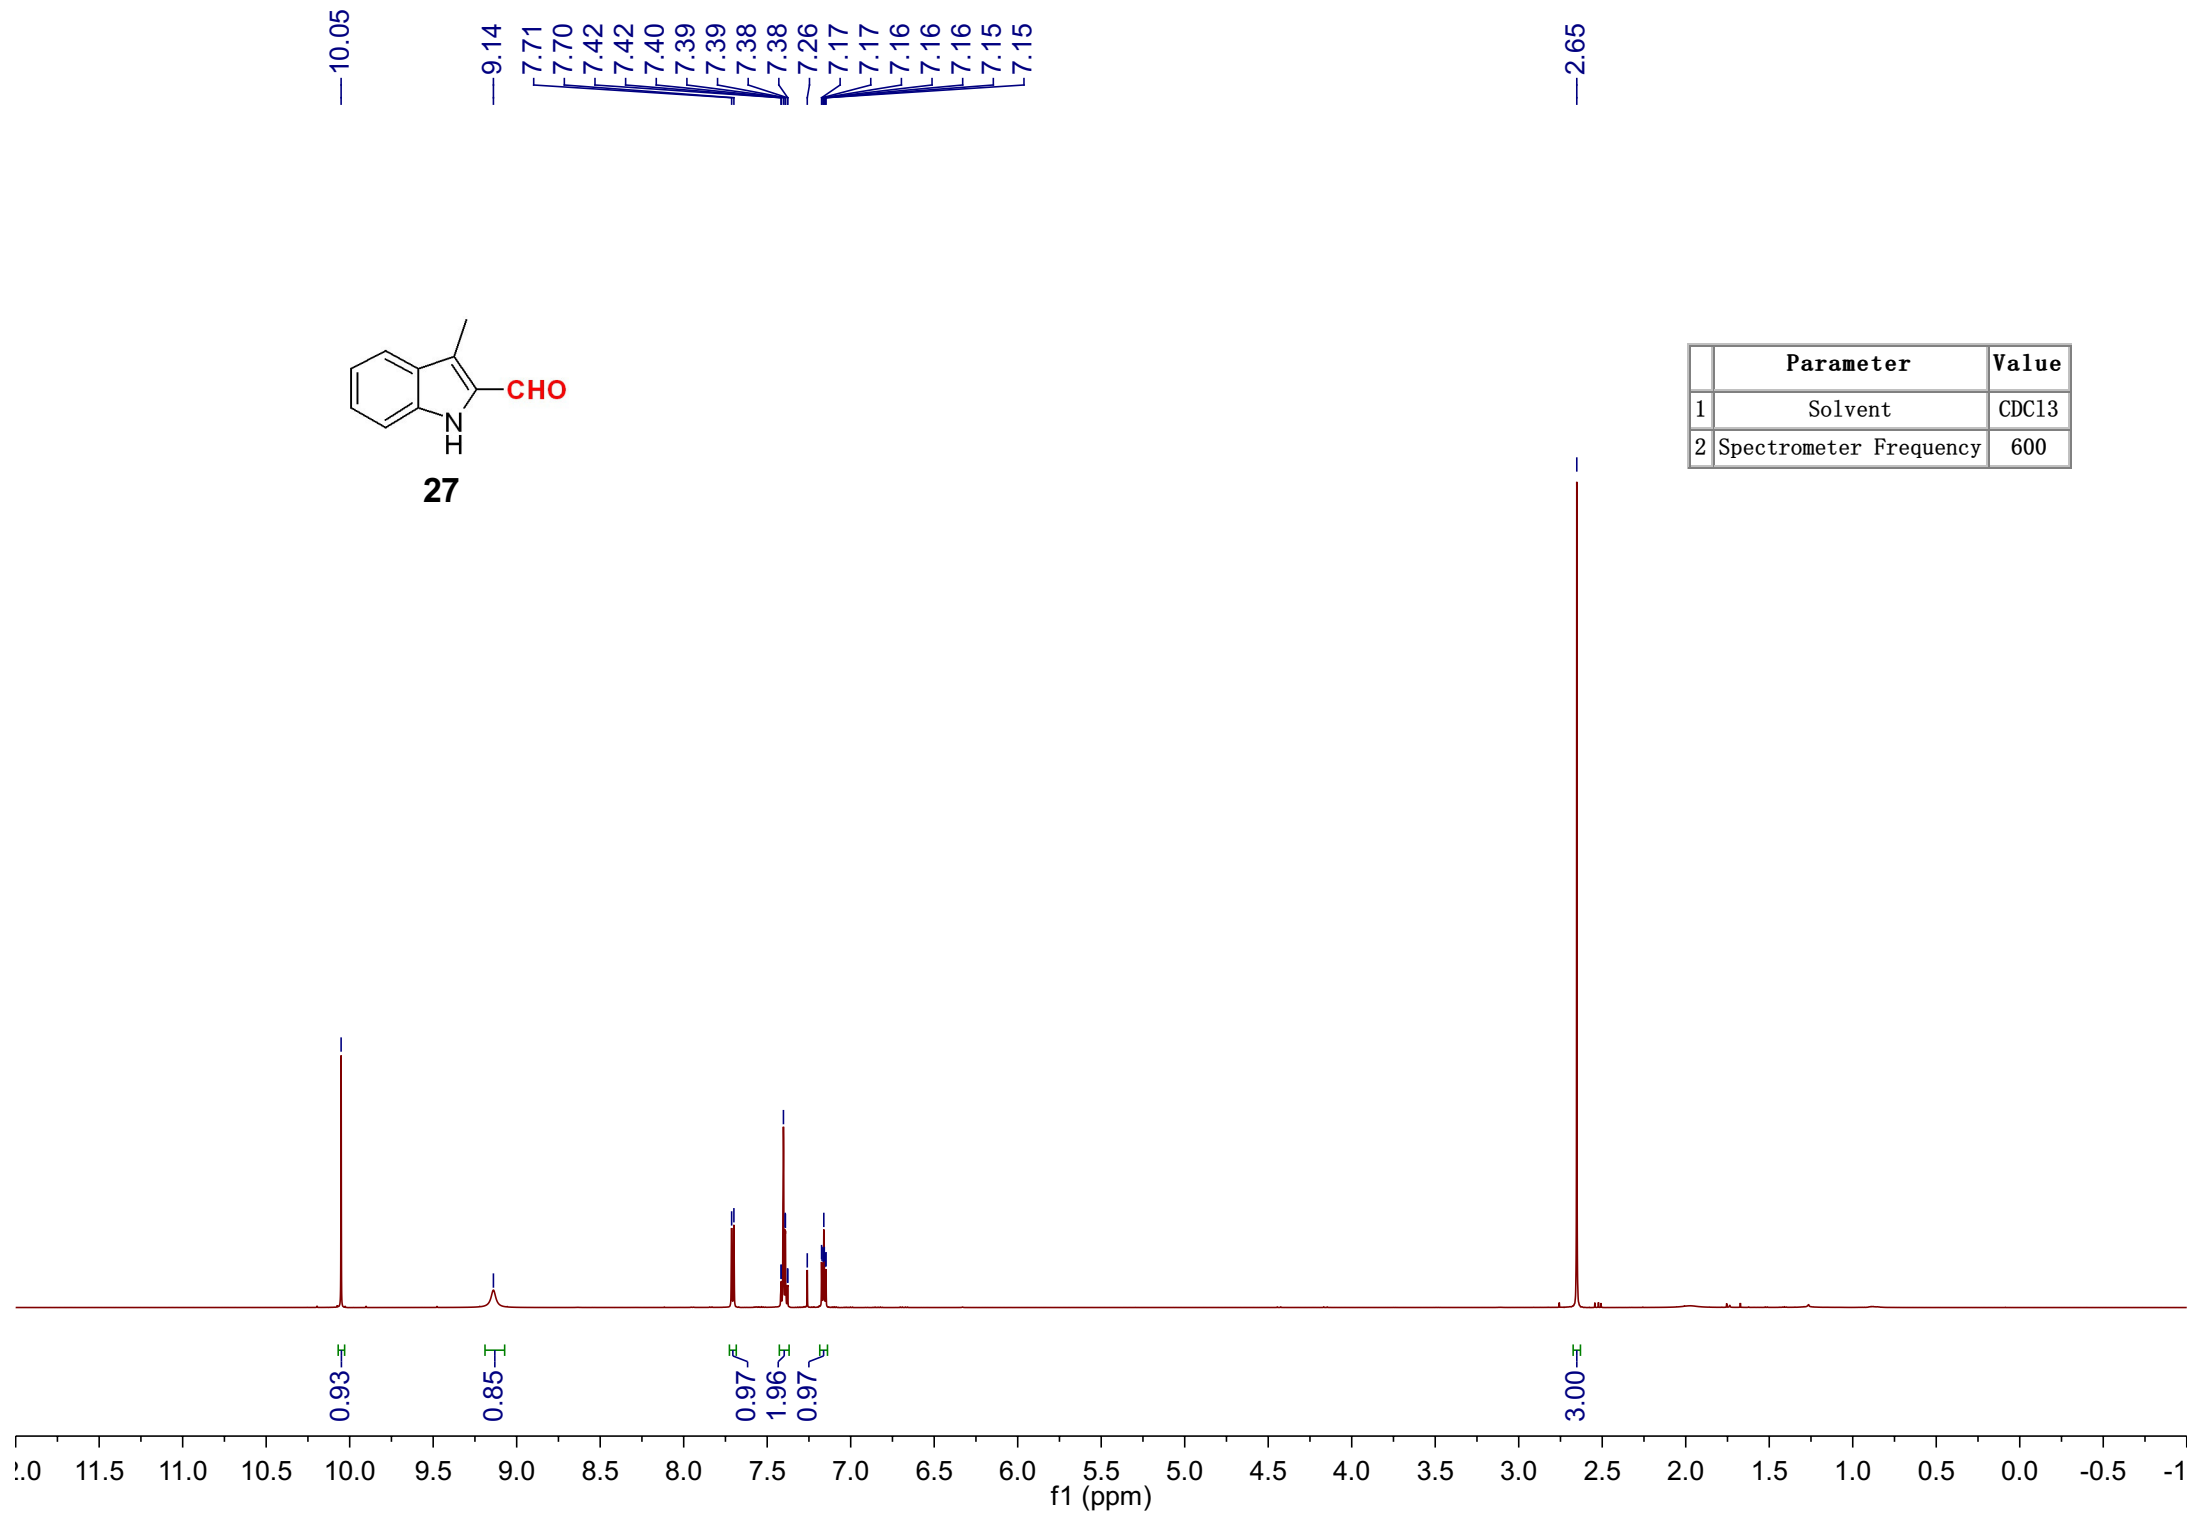

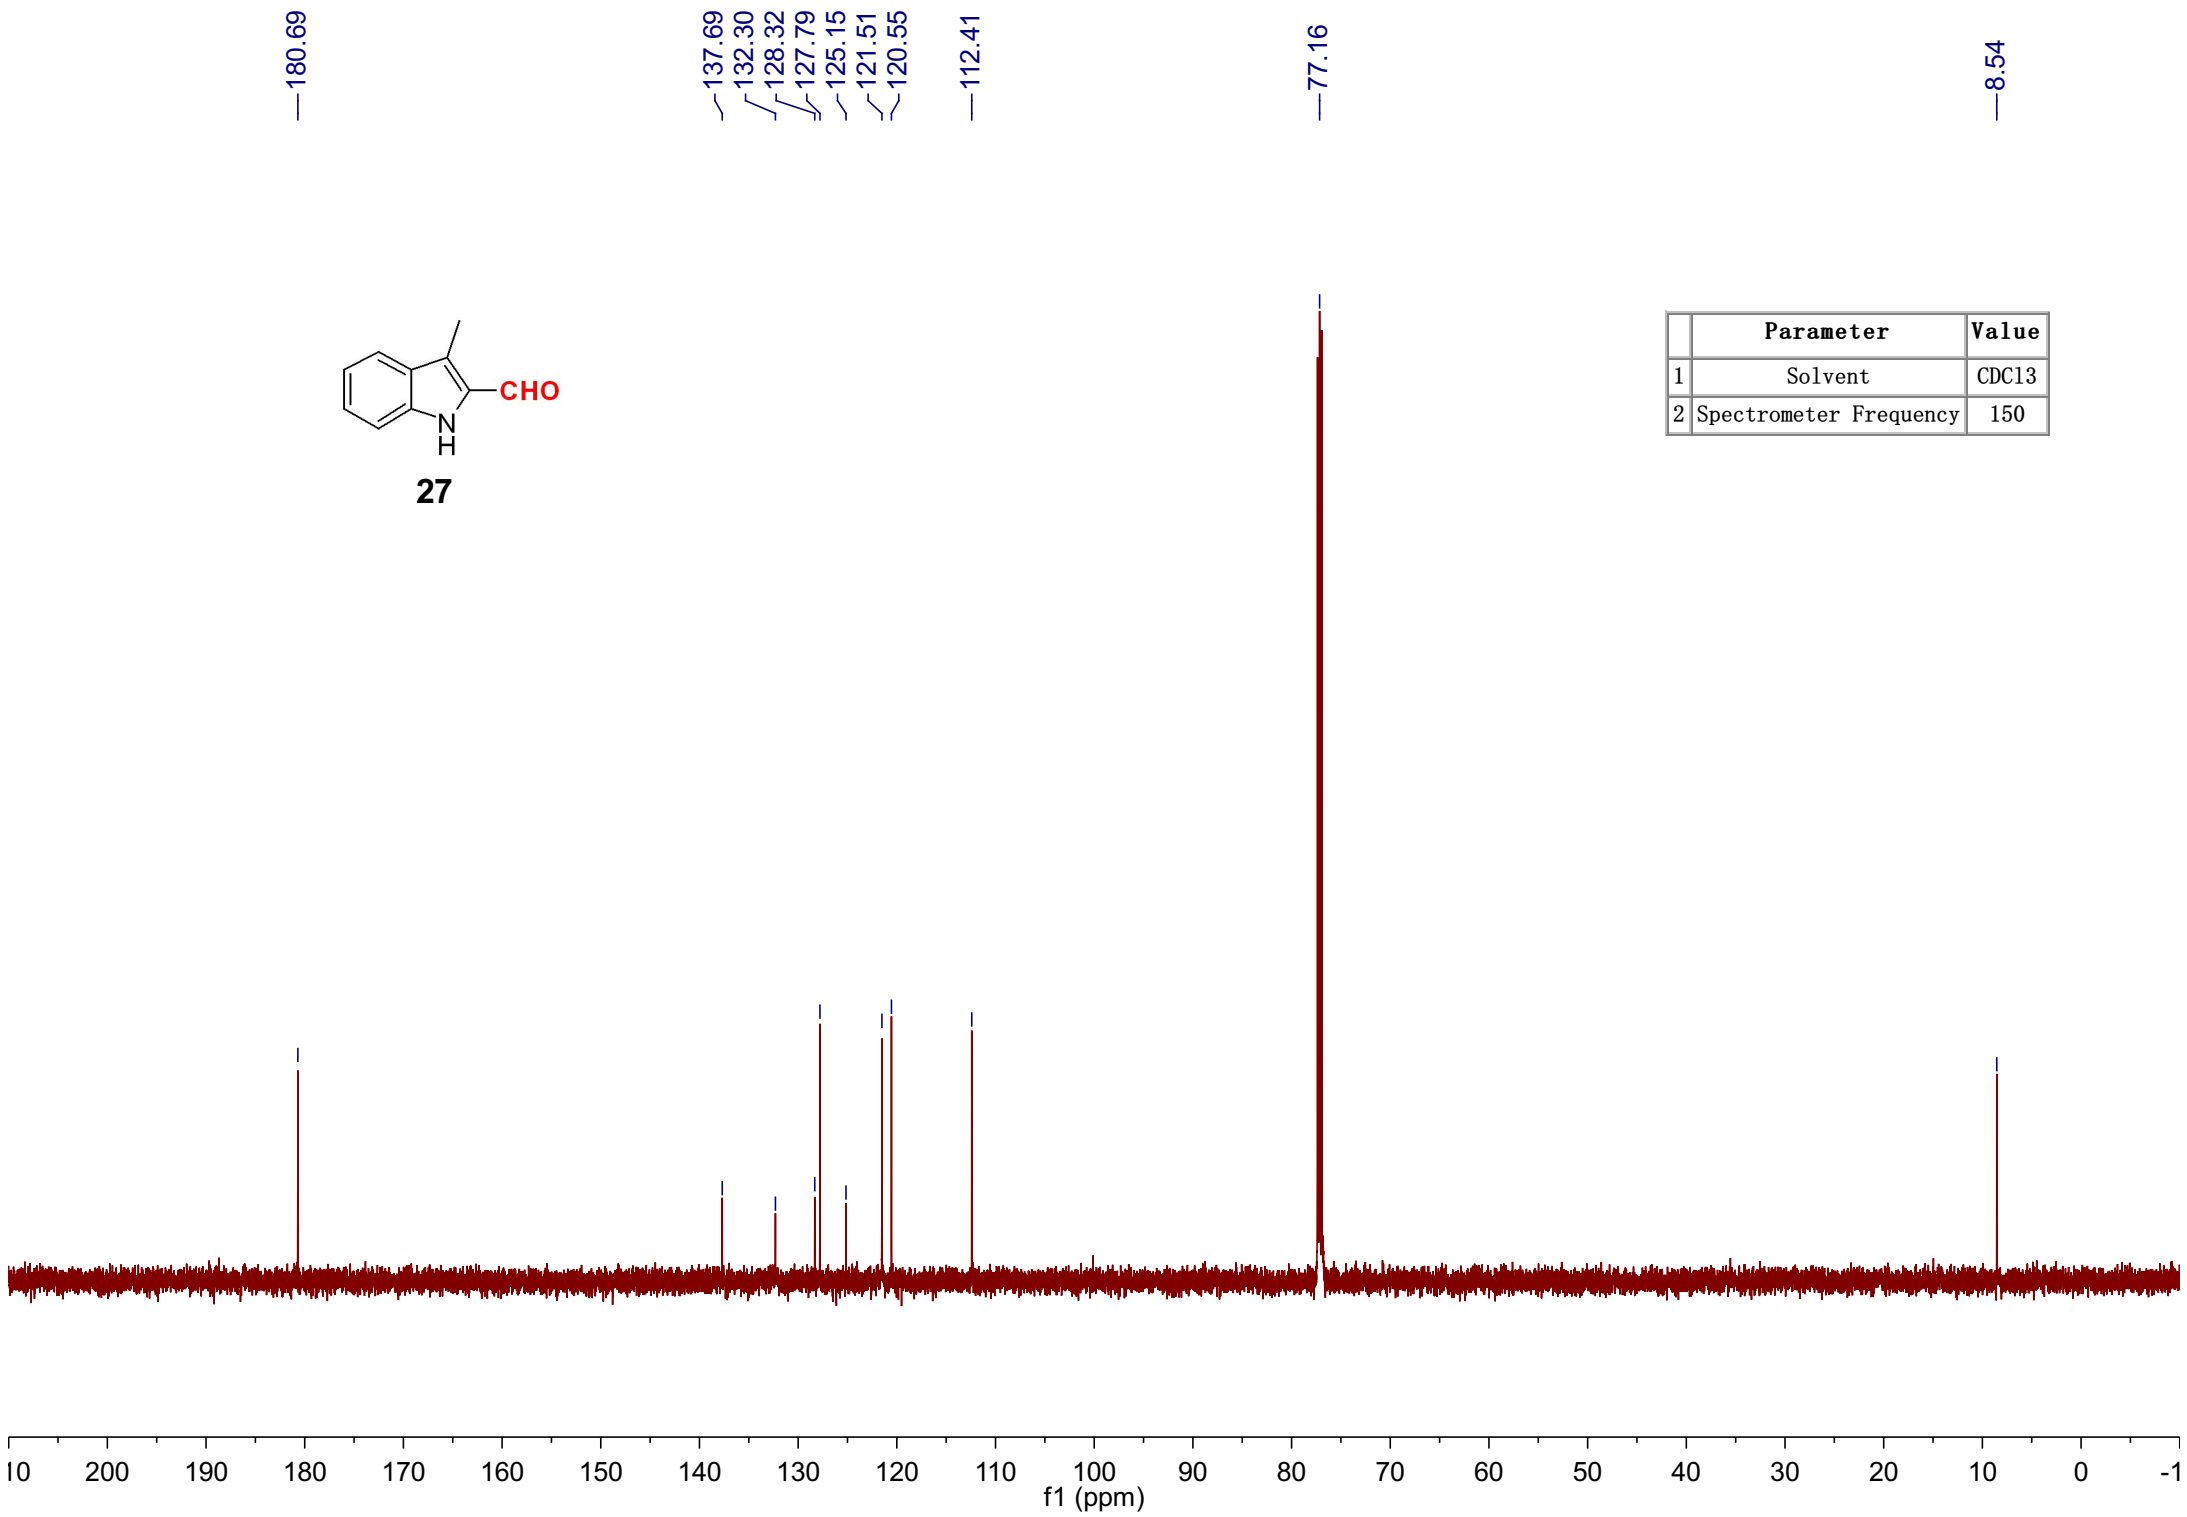

|   | Parameter              | Value |
|---|------------------------|-------|
| 1 | Solvent                | CDCl3 |
| 2 | Spectrometer Frequency | 150   |



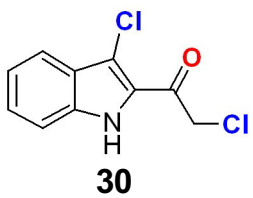

—12.18

7.65  
7.64  
7.51  
7.49  
7.42  
7.42  
7.41  
7.40  
7.40  
7.39  
7.39  
7.23  
7.22  
7.21  
7.21  
7.20  
7.20

—5.11

—2.50

|   | Parameter              | Value |
|---|------------------------|-------|
| 1 | Solvent                | DMSO  |
| 2 | Spectrometer Frequency | 600   |

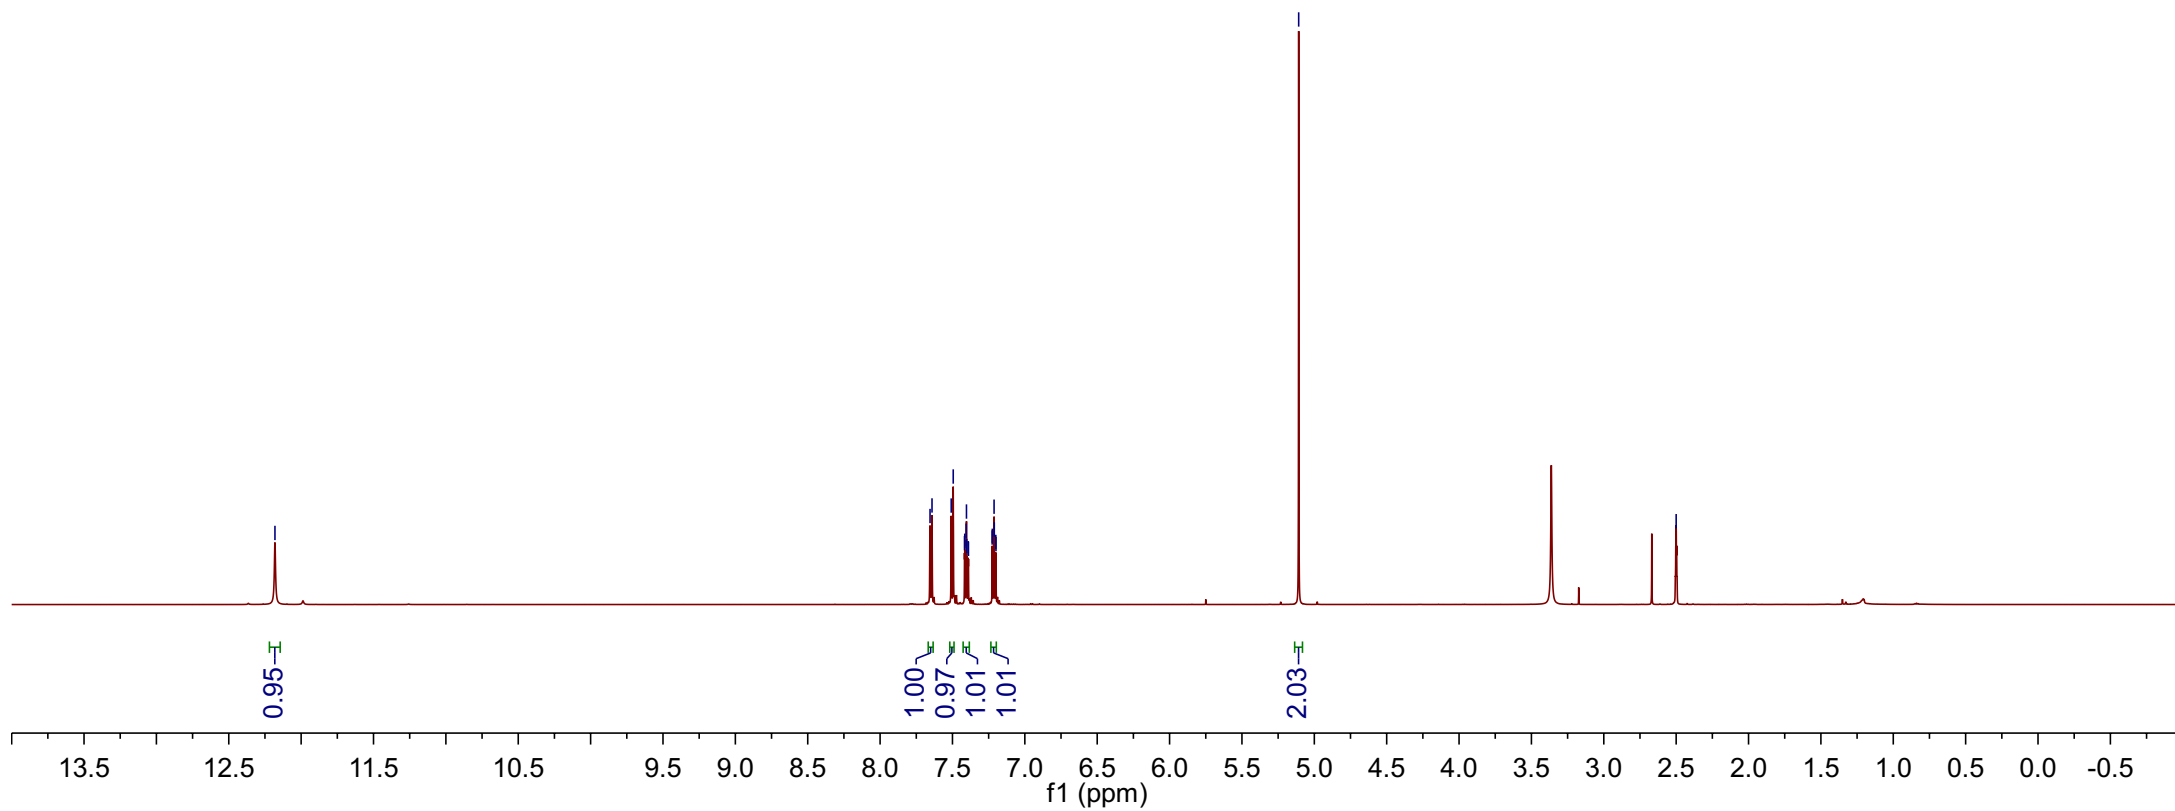

—182.86

—135.78

—128.59

—127.08

—124.95

—121.43

—119.65

—113.28

—110.01

—48.34

—39.52

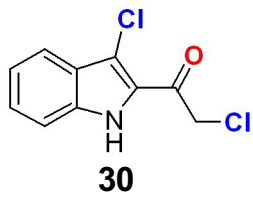

|   | Parameter              | Value |
|---|------------------------|-------|
| 1 | Solvent                | DMSO  |
| 2 | Spectrometer Frequency | 150   |

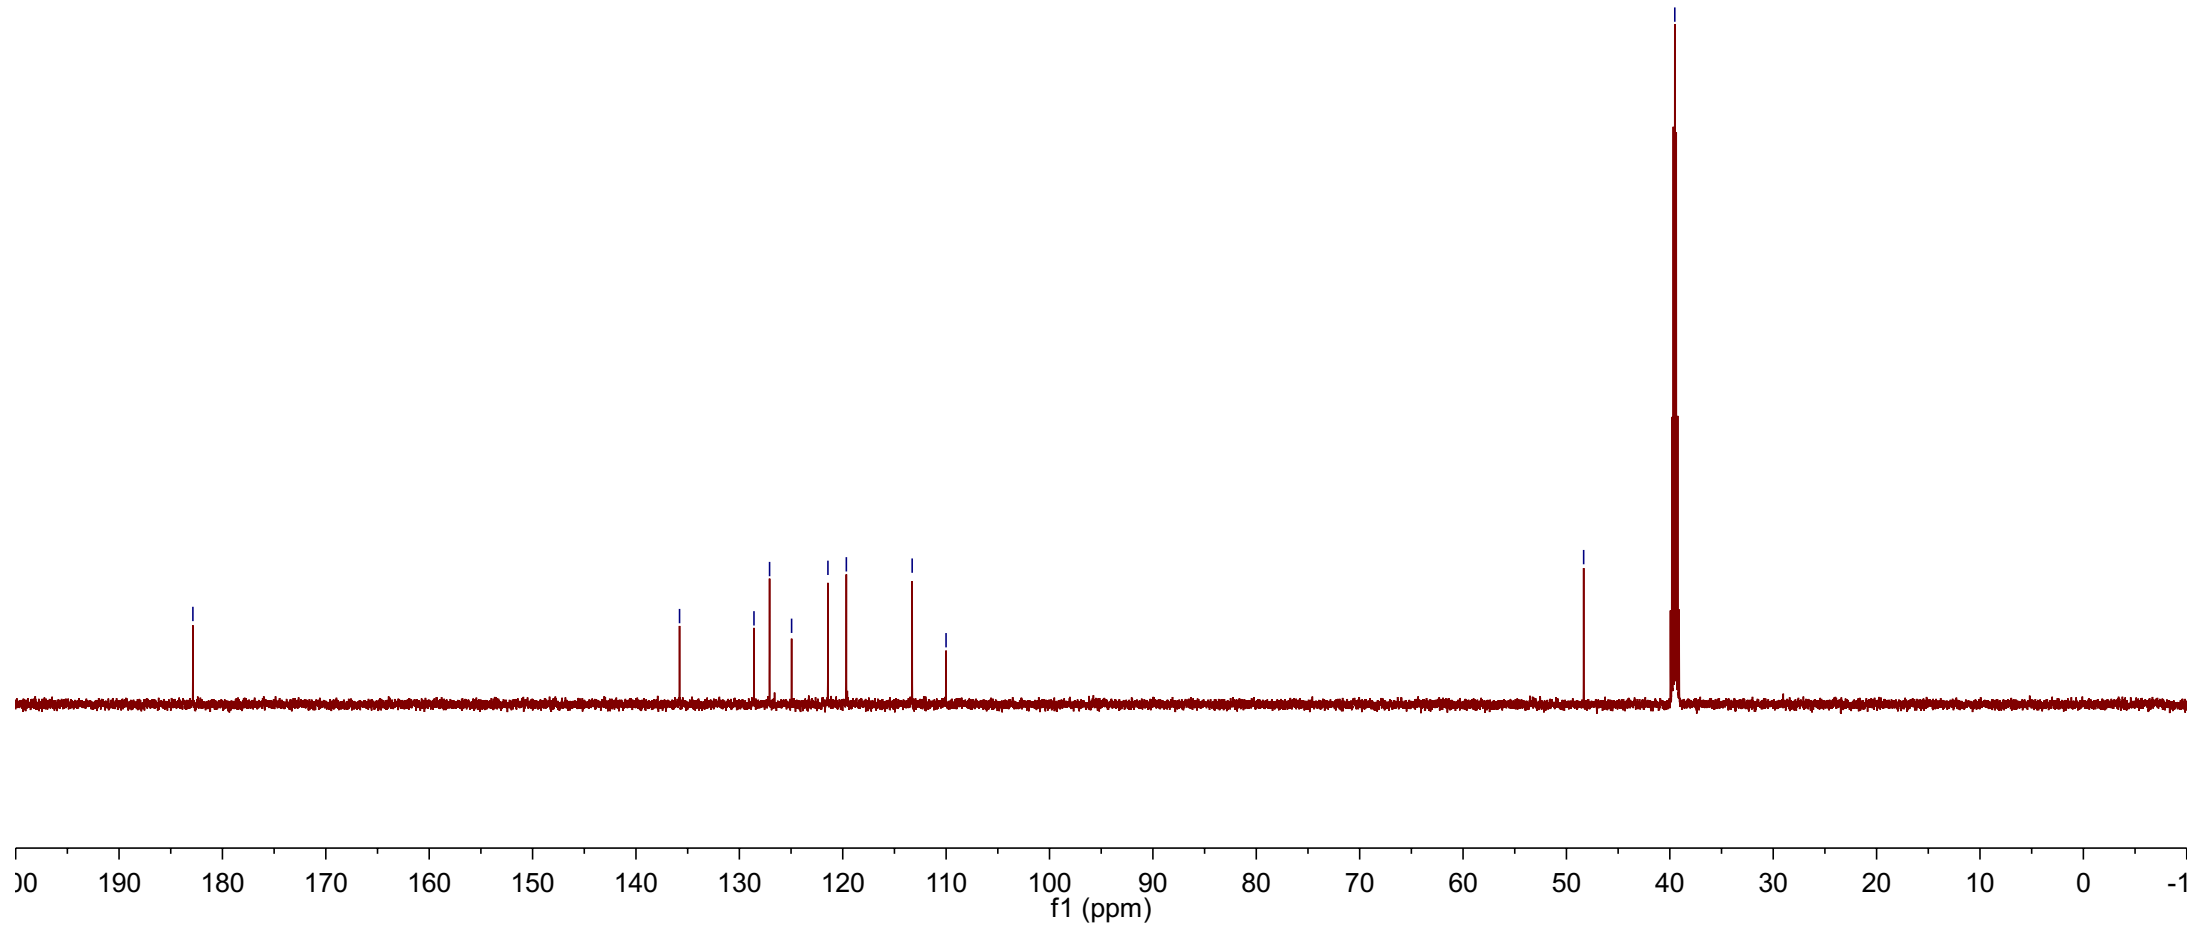

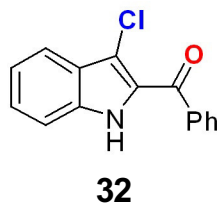

|   | Parameter              | Value             |
|---|------------------------|-------------------|
| 1 | Solvent                | CDCl <sub>3</sub> |
| 2 | Spectrometer Frequency | 600               |

9.71  
7.92  
7.90  
7.90  
7.74  
7.73  
7.64  
7.63  
7.62  
7.54  
7.53  
7.52  
7.47  
7.45  
7.43  
7.43  
7.42  
7.42  
7.40  
7.40  
7.26  
7.25  
7.25  
7.24  
7.23

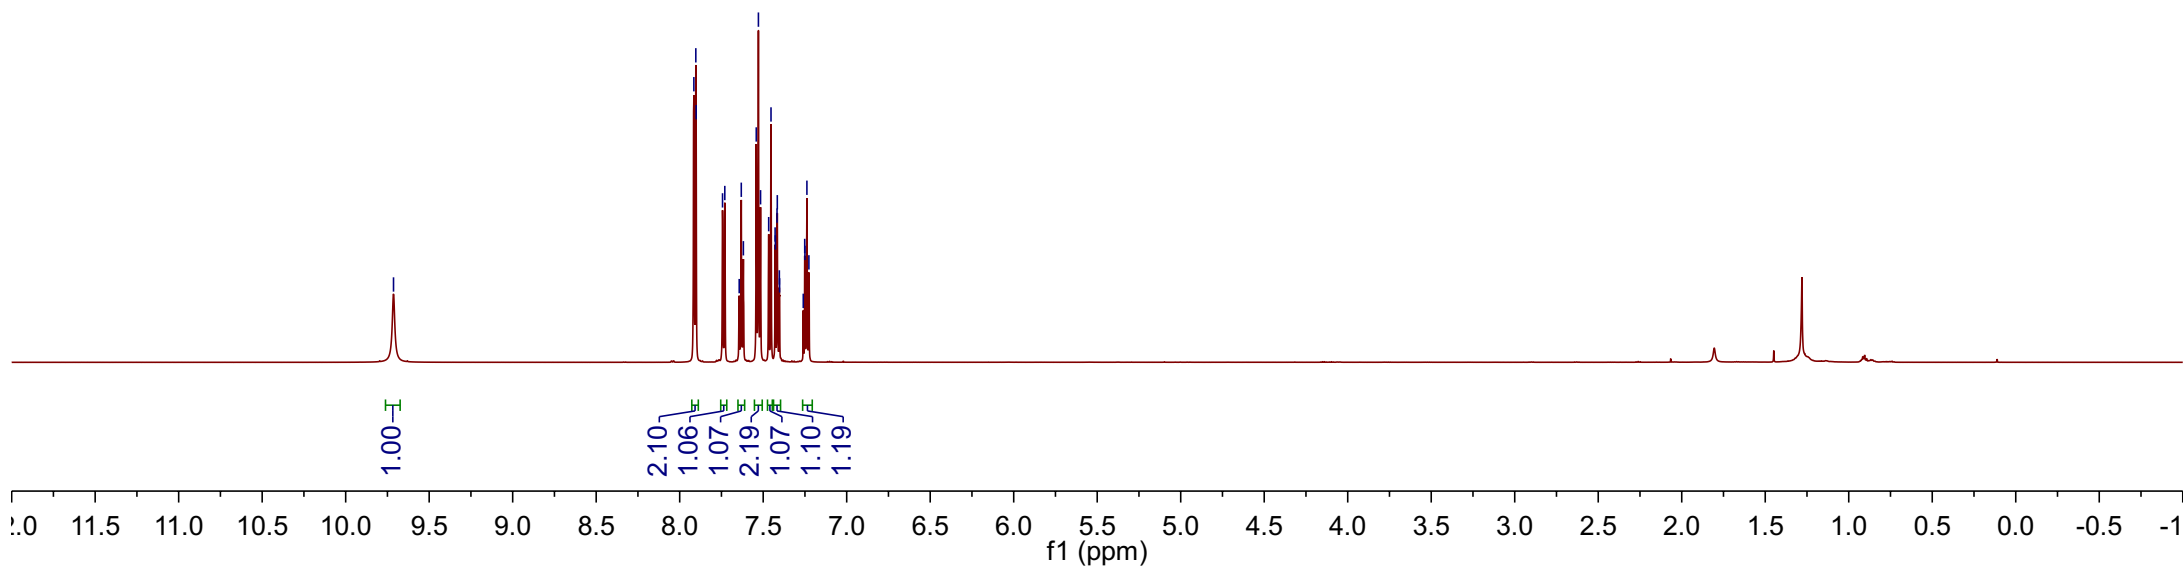

—188.06

137.69  
135.79  
132.82  
130.04  
129.68  
128.40  
127.46  
126.57  
121.62  
120.73  
112.67  
112.55

—77.16

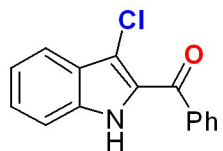

**32**

|   | Parameter              | Value |
|---|------------------------|-------|
| 1 | Solvent                | CDC13 |
| 2 | Spectrometer Frequency | 150   |

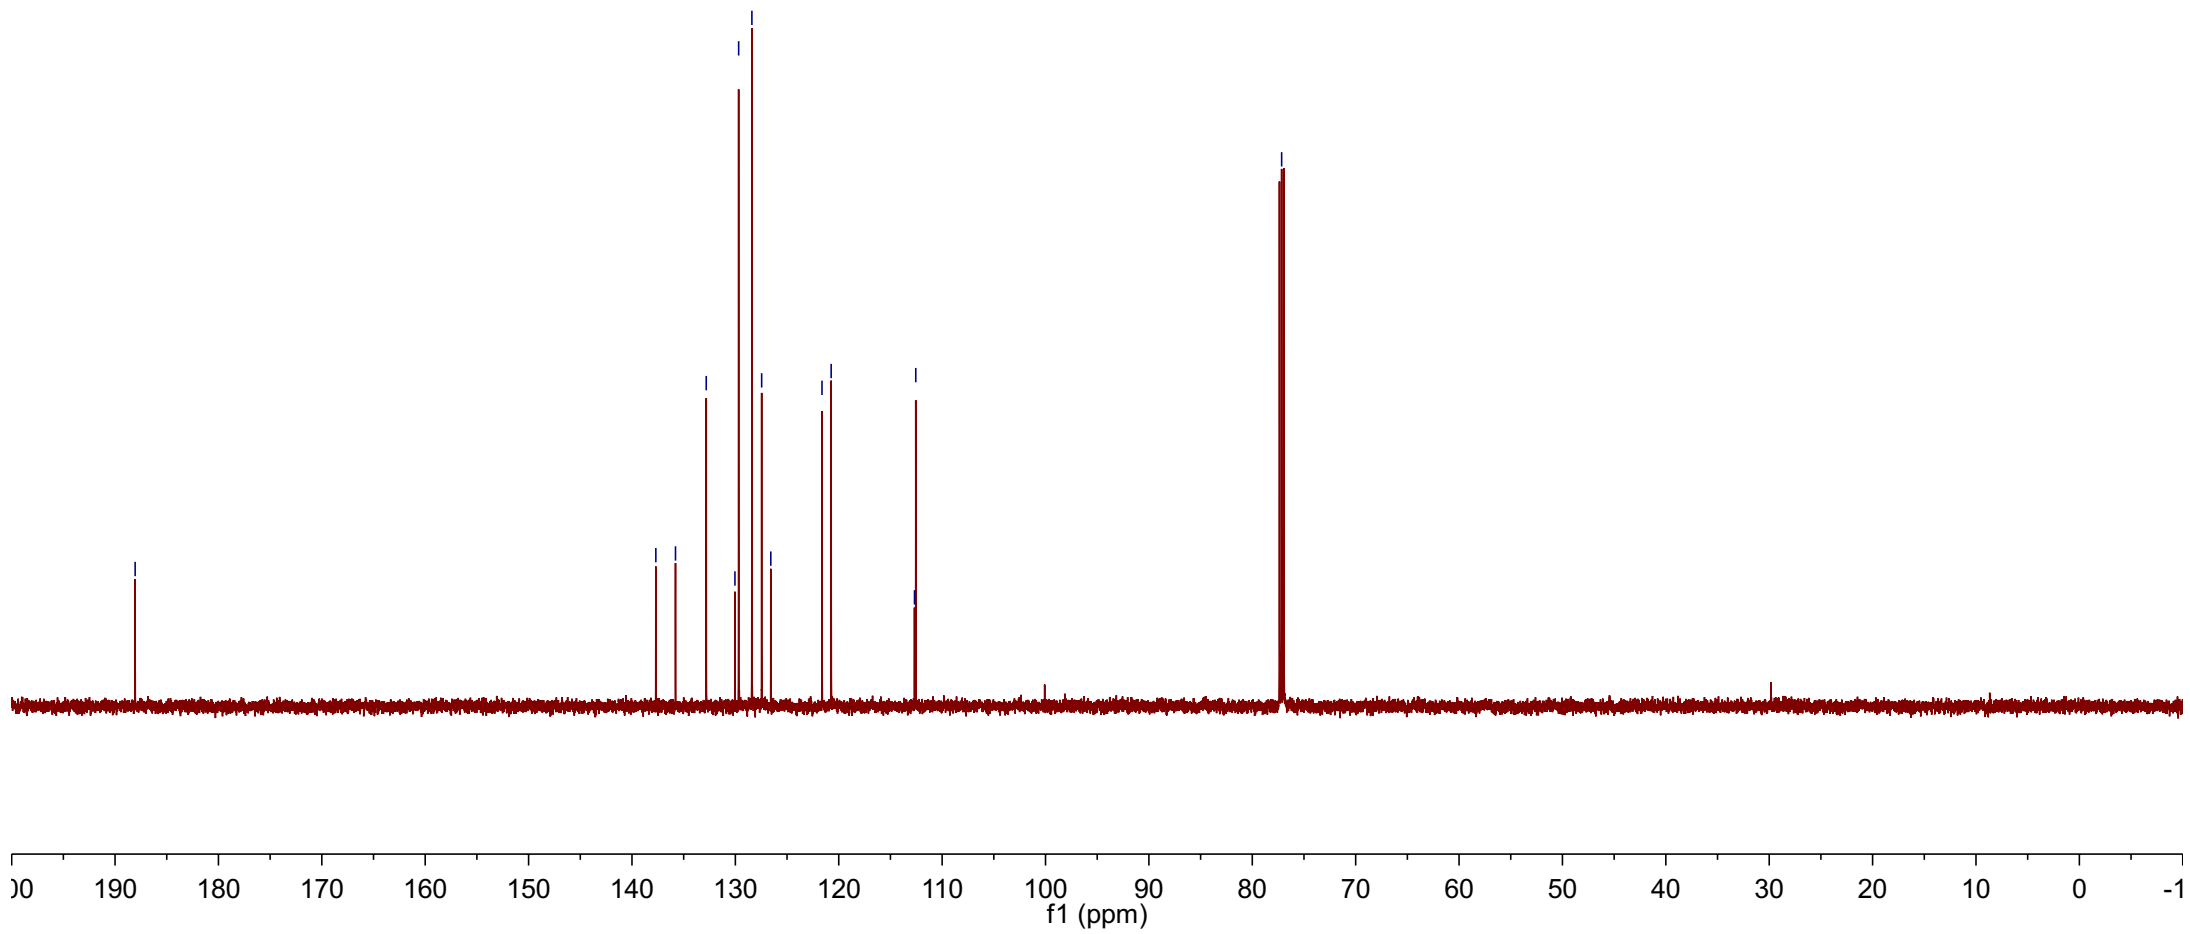

8.47  
8.46  
8.46  
7.74  
7.73  
7.64  
7.62  
7.58  
7.57  
7.56  
7.55  
7.54  
7.53  
7.48  
7.48  
7.47  
7.47  
7.46  
7.46  
7.39  
7.38  
7.37  
7.26

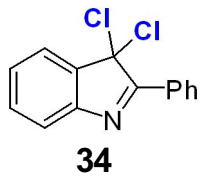

|   | Parameter              | Value |
|---|------------------------|-------|
| 1 | Solvent                | CDC13 |
| 2 | Spectrometer Frequency | 600   |

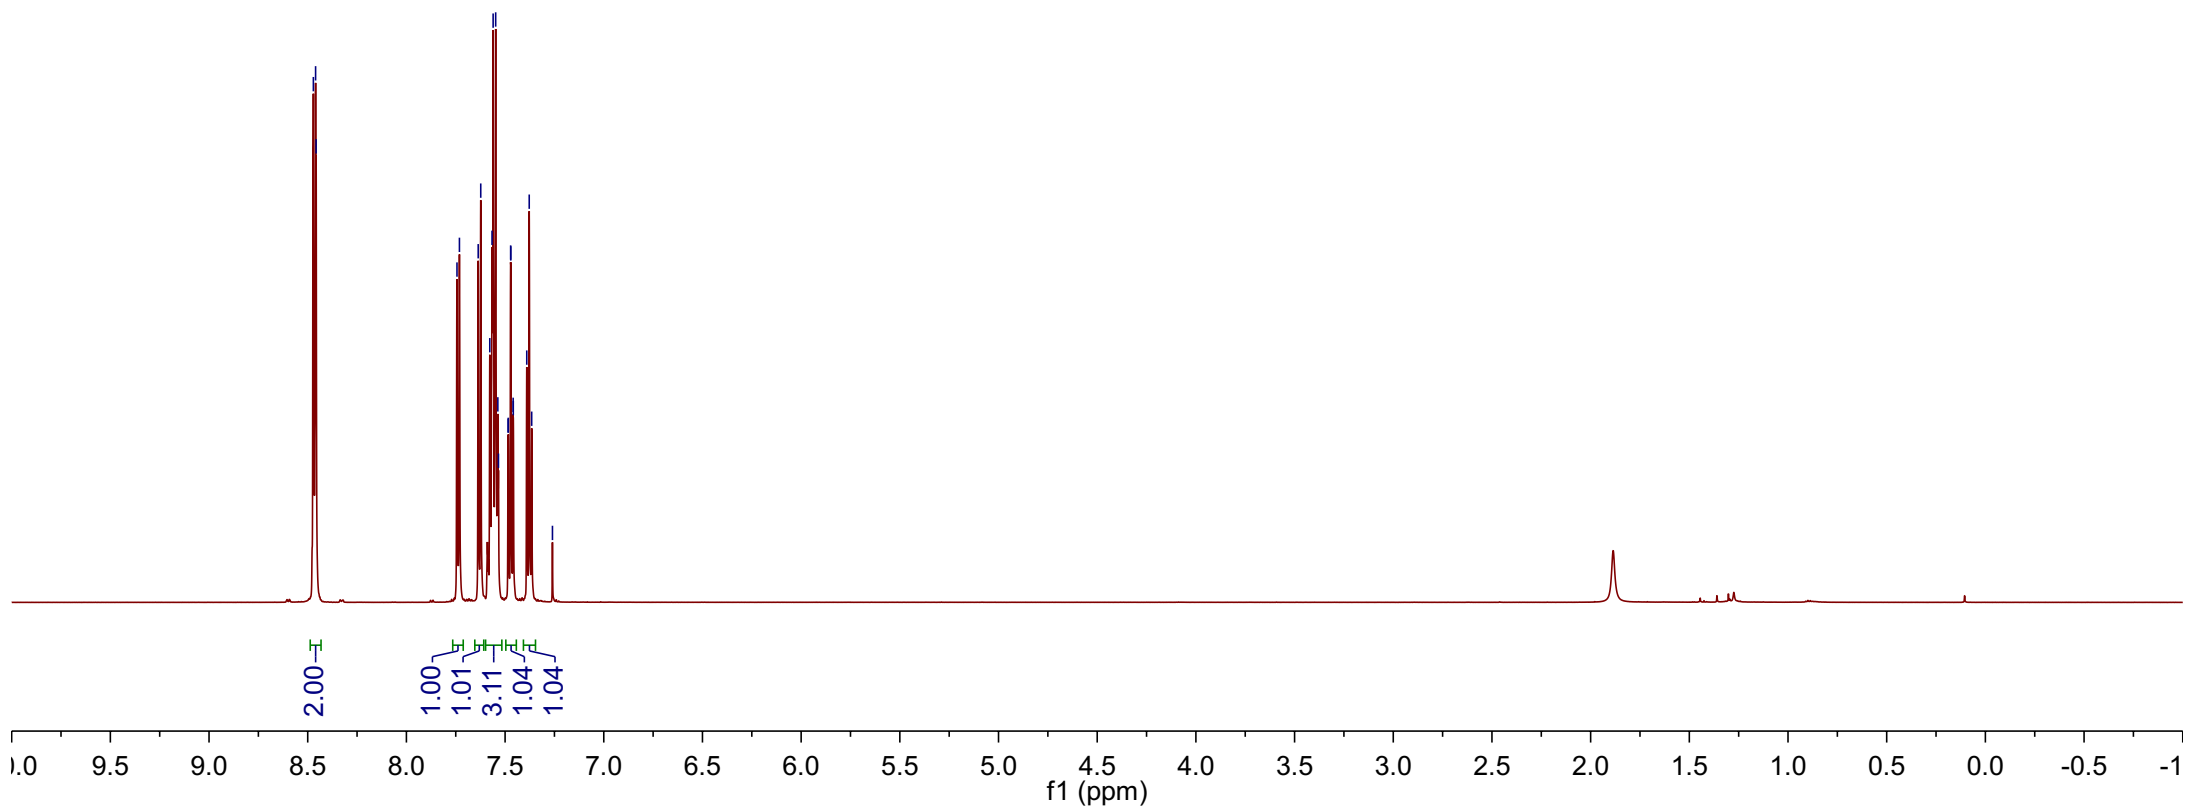

—172.00

—149.43

—139.95

132.20

131.64

129.53

128.79

128.71

128.00

122.82

121.68

—80.30

—77.16

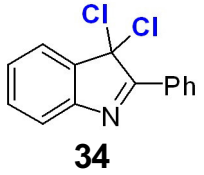

|   | Parameter              | Value |
|---|------------------------|-------|
| 1 | Solvent                | CDC13 |
| 2 | Spectrometer Frequency | 150   |

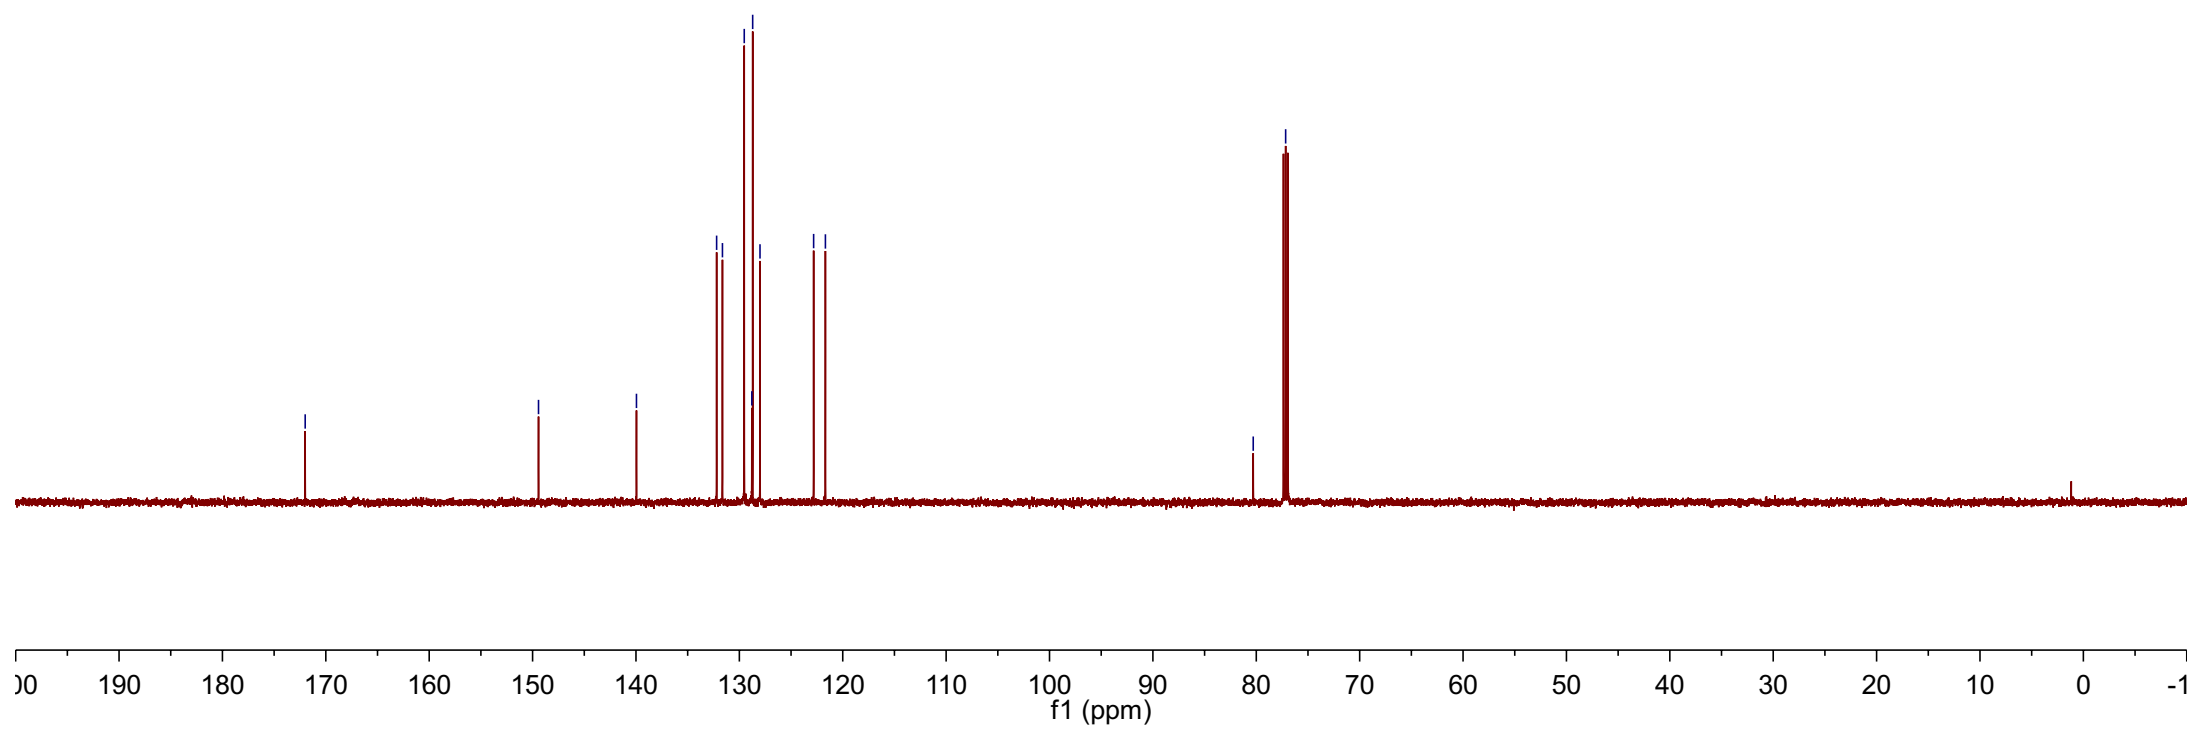

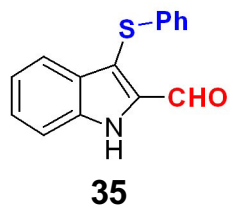

—10.22

—9.73

7.69  
7.67  
7.54  
7.52  
7.45  
7.44  
7.43  
7.26  
7.21  
7.20  
7.20  
7.18  
7.14

|   | Parameter              | Value |
|---|------------------------|-------|
| 1 | Solvent                | CDCl3 |
| 2 | Spectrometer Frequency | 600   |

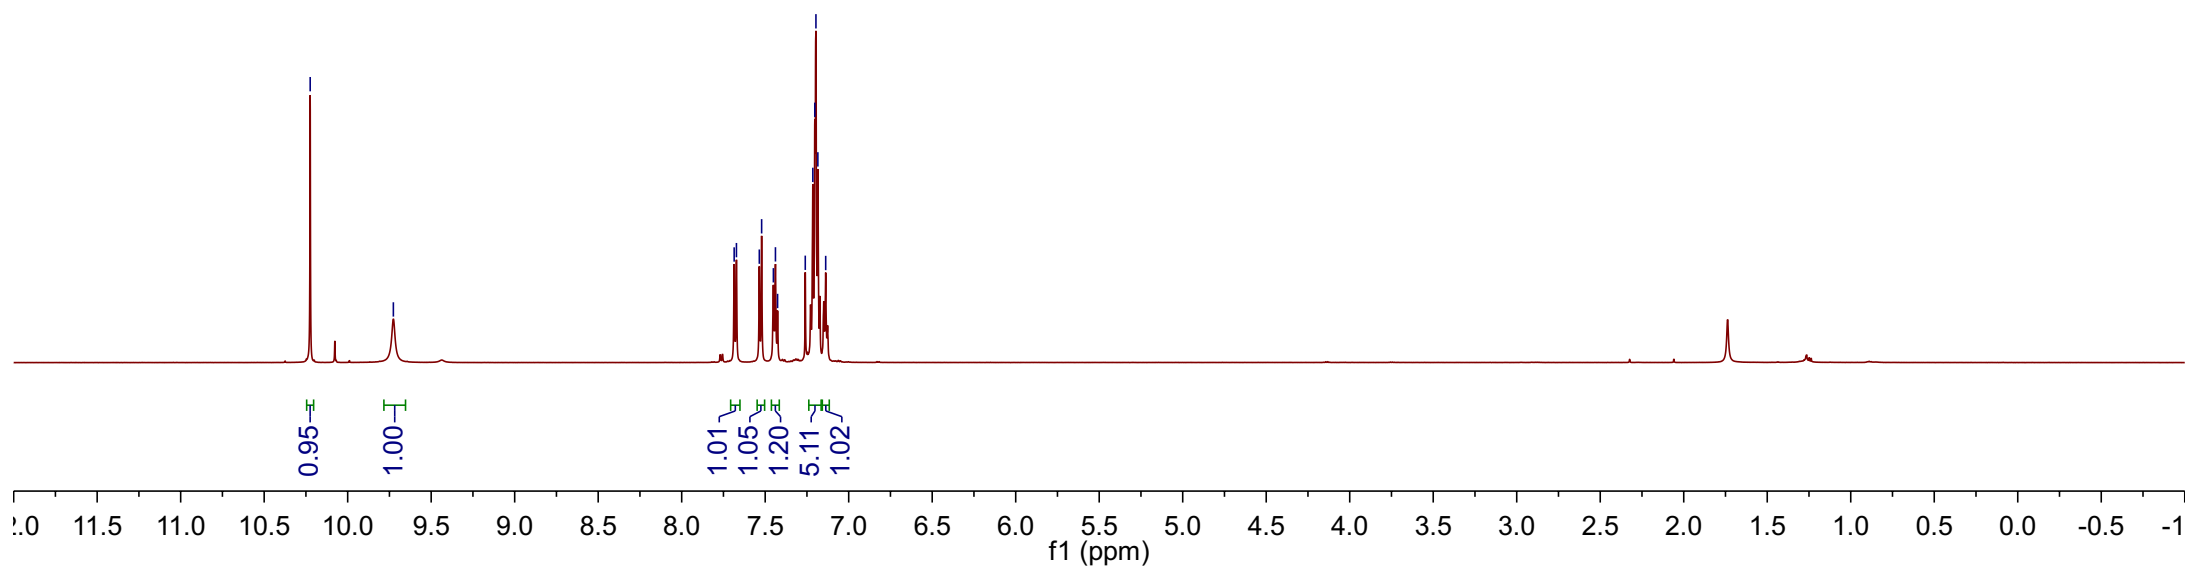



|   | Parameter              | Value             |
|---|------------------------|-------------------|
| 1 | Solvent                | CDCl <sub>3</sub> |
| 2 | Spectrometer Frequency | 150               |

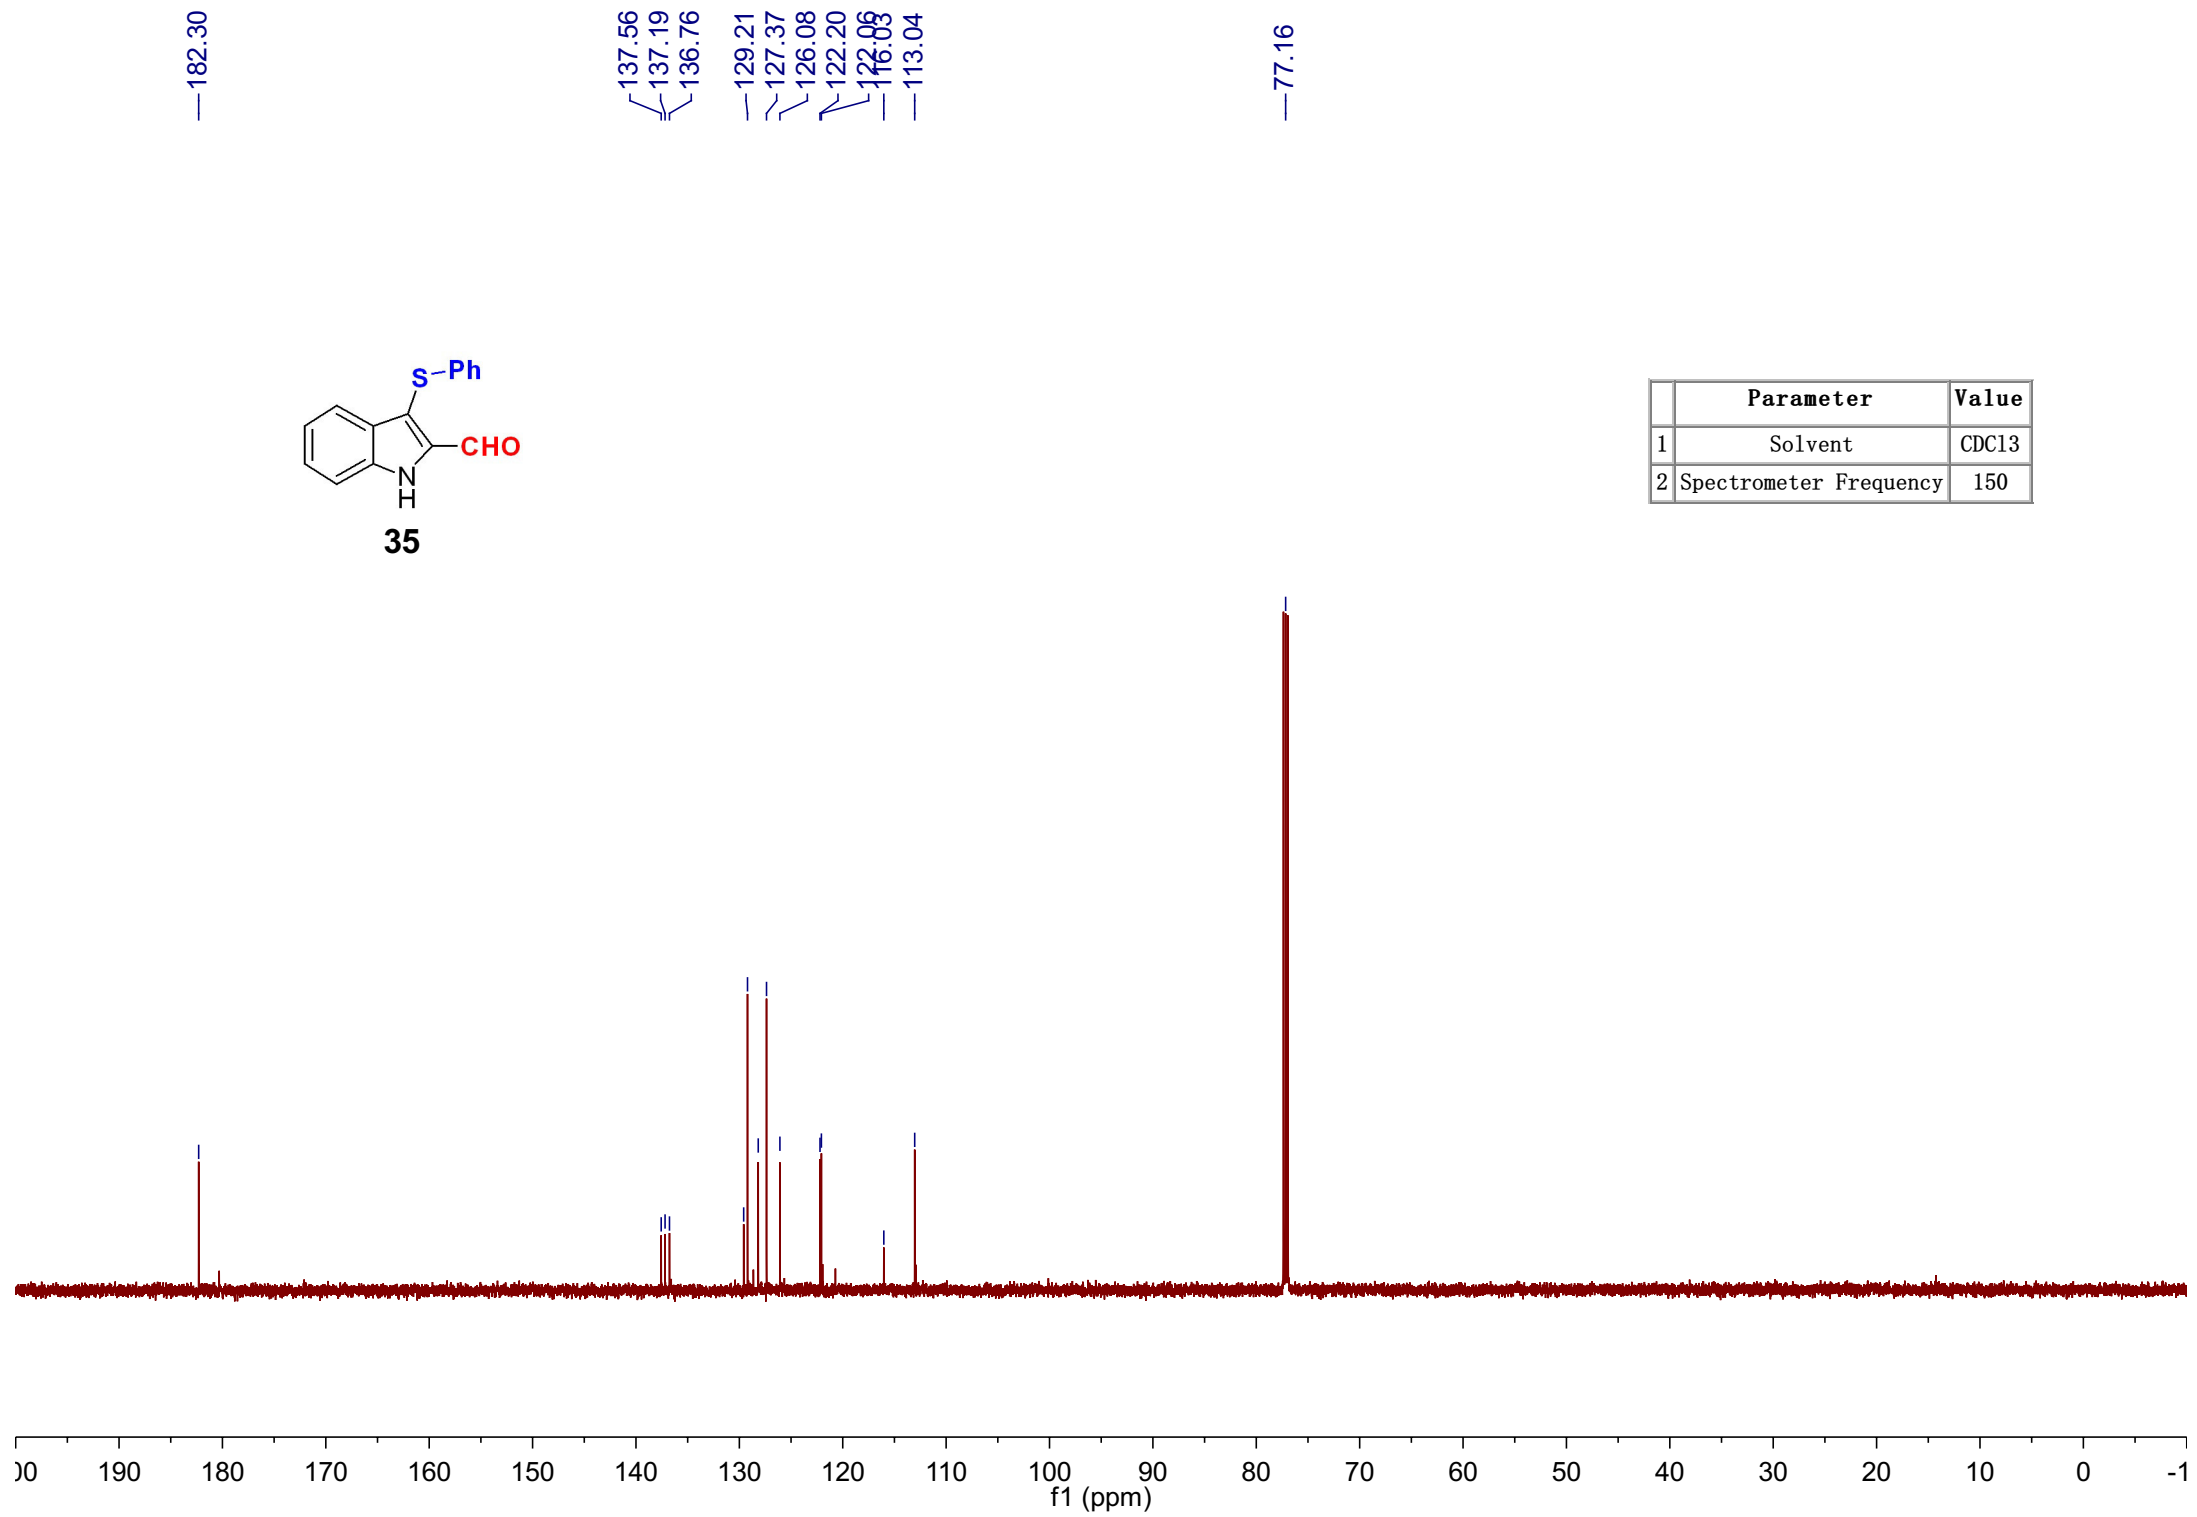



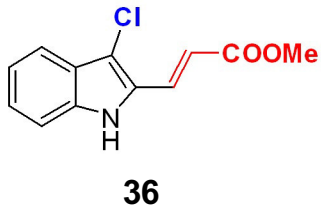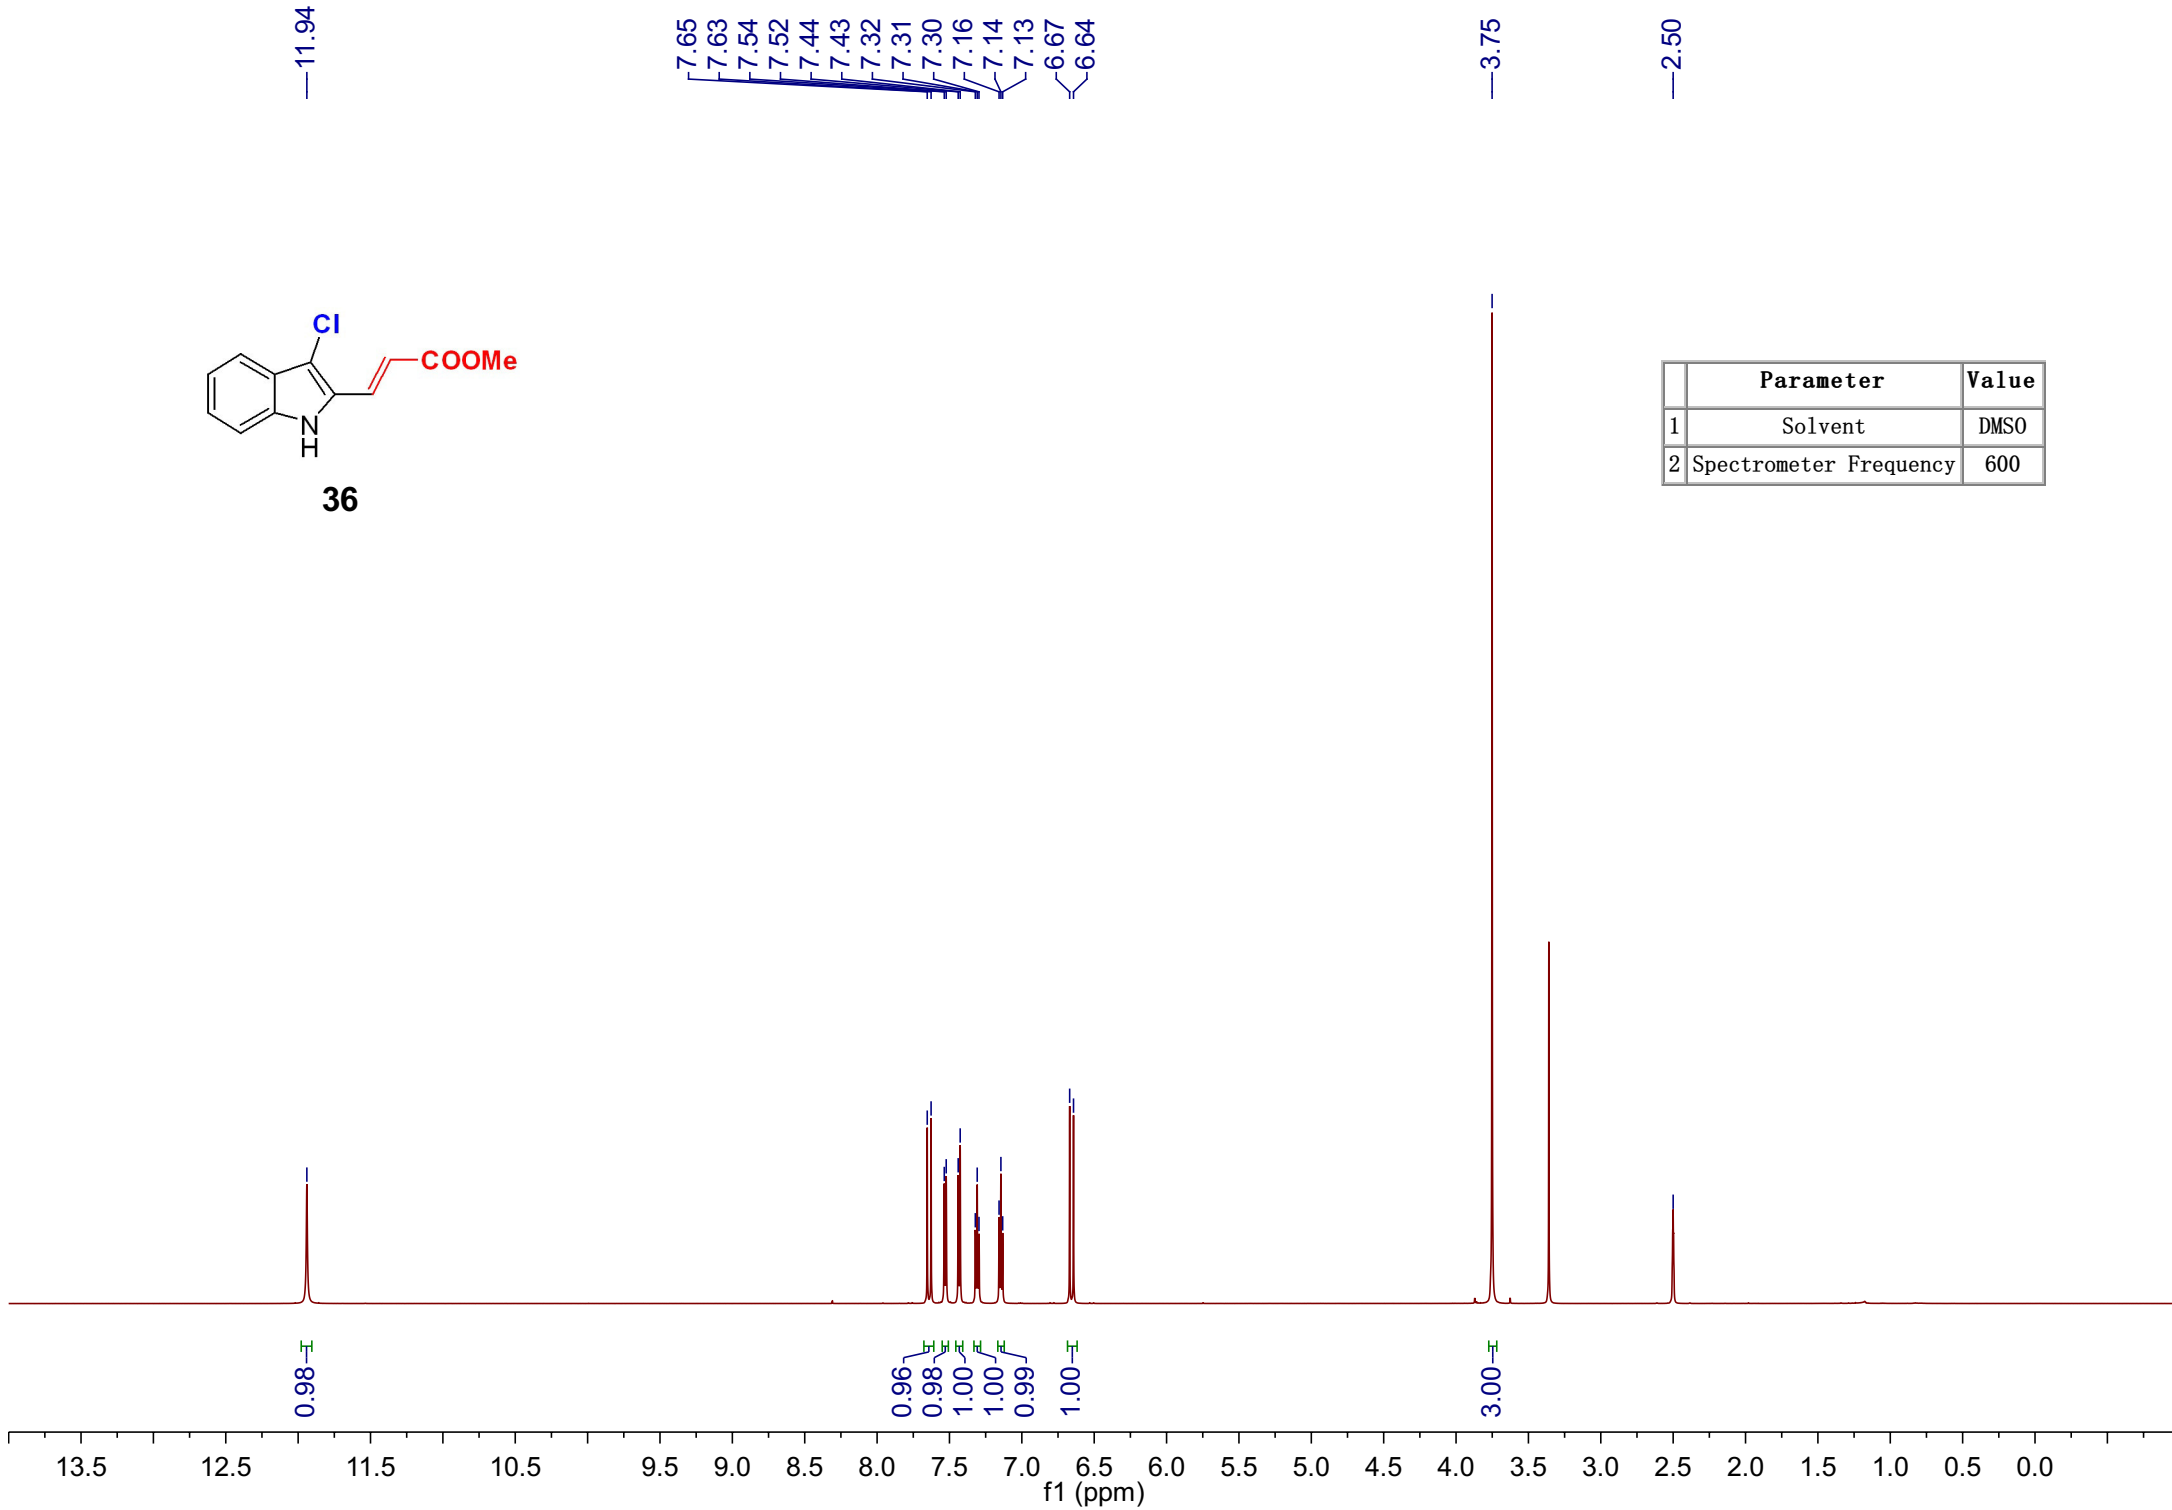

11.94

7.65  
7.63  
7.54  
7.52  
7.44  
7.43  
7.32  
7.31  
7.30  
7.16  
7.14  
7.13  
6.67  
6.64

3.75

2.50

0.98

0.96  
0.98  
1.00  
1.00  
0.99

1.00

3.00

13.5 12.5 11.5 10.5 9.5 9.0 8.5 8.0 7.5 7.0 6.5 6.0 5.5 5.0 4.5 4.0 3.5 3.0 2.5 2.0 1.5 1.0 0.5 0.0

f1 (ppm)

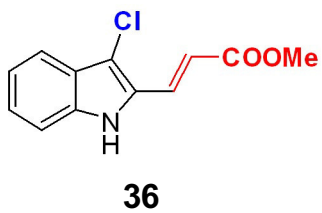

—166.44

—136.24

—129.86

—128.99

—125.47

—124.98

—120.74

—118.18

—116.84

—112.14

—109.14

—51.68

—39.52

|   | Parameter              | Value |
|---|------------------------|-------|
| 1 | Solvent                | DMSO  |
| 2 | Spectrometer Frequency | 150   |



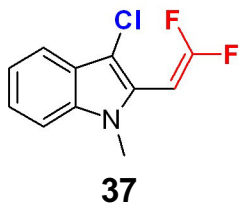

7.63  
7.62  
7.31  
7.30  
7.30  
7.29  
7.29  
7.28  
7.28  
7.26  
7.22  
7.21  
7.21  
7.20  
7.20  
7.19  
7.19

5.37  
5.37  
5.33  
5.33

3.67  
3.67

|   | Parameter              | Value |
|---|------------------------|-------|
| 1 | Solvent                | CDC13 |
| 2 | Spectrometer Frequency | 600   |

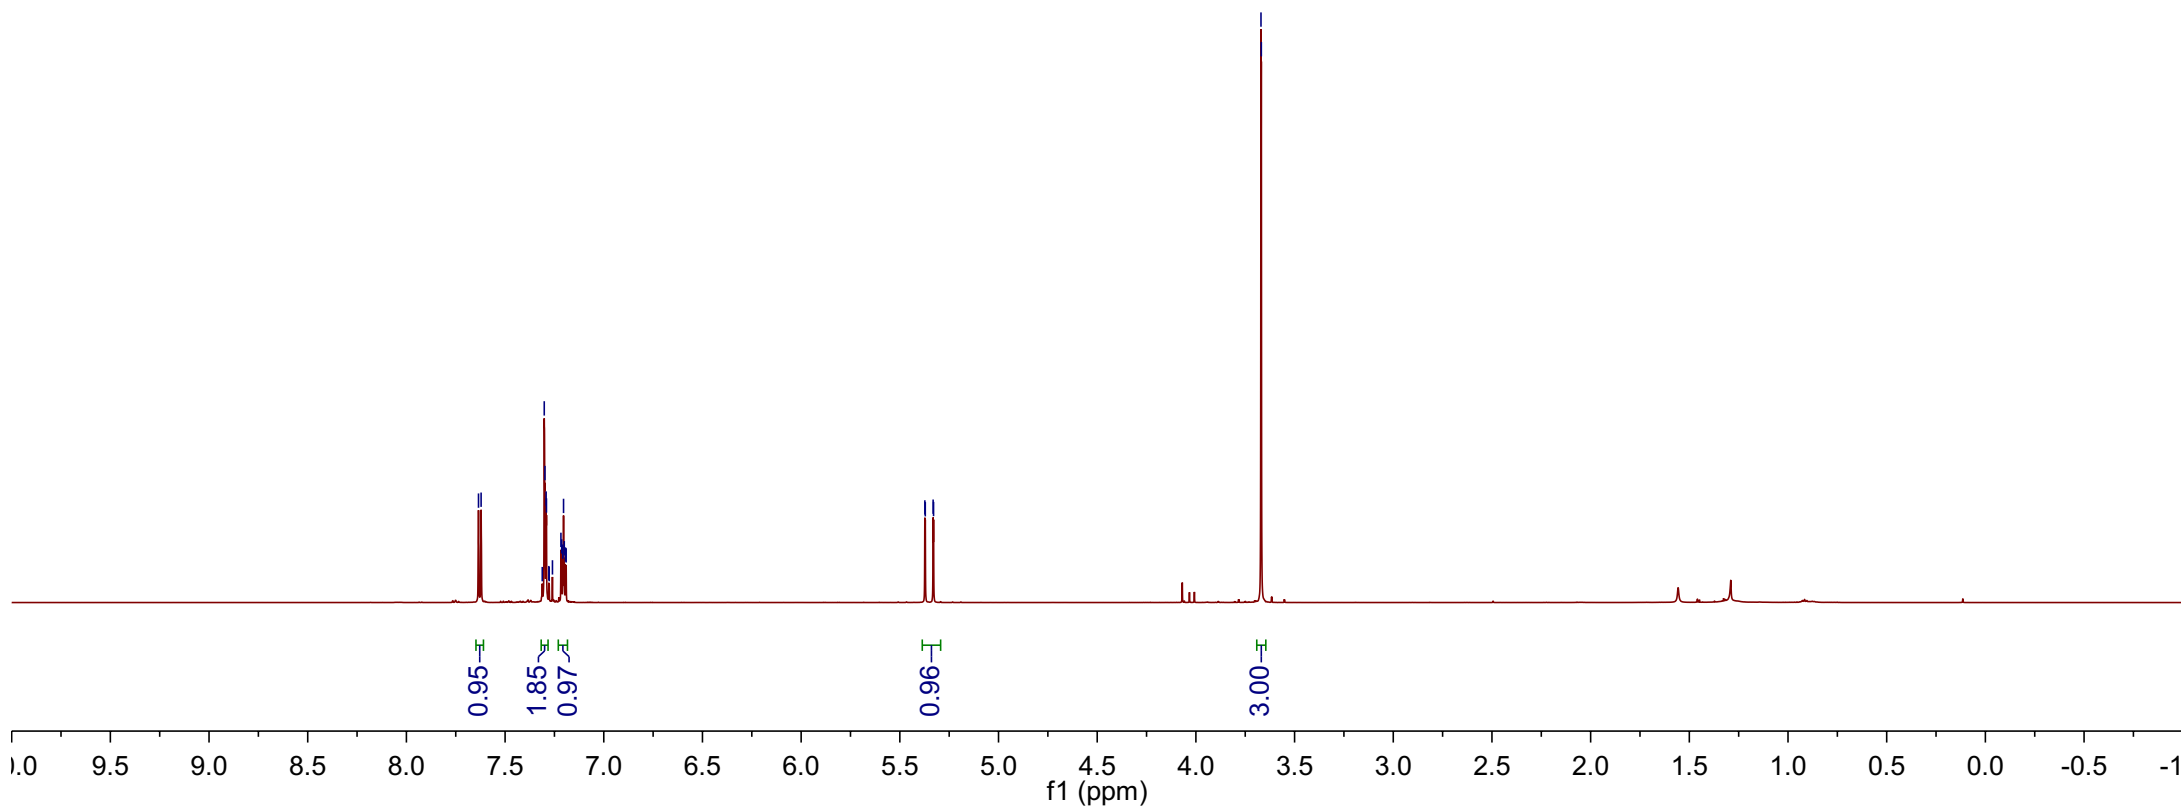



158.63  
156.70  
156.65  
154.71

136.39

125.39  
123.21  
120.46  
118.31

109.57

77.16  
71.14  
71.02  
70.90  
70.79

30.96  
30.94

|   | Parameter              | Value |
|---|------------------------|-------|
| 1 | Solvent                | CDC13 |
| 2 | Spectrometer Frequency | 150   |

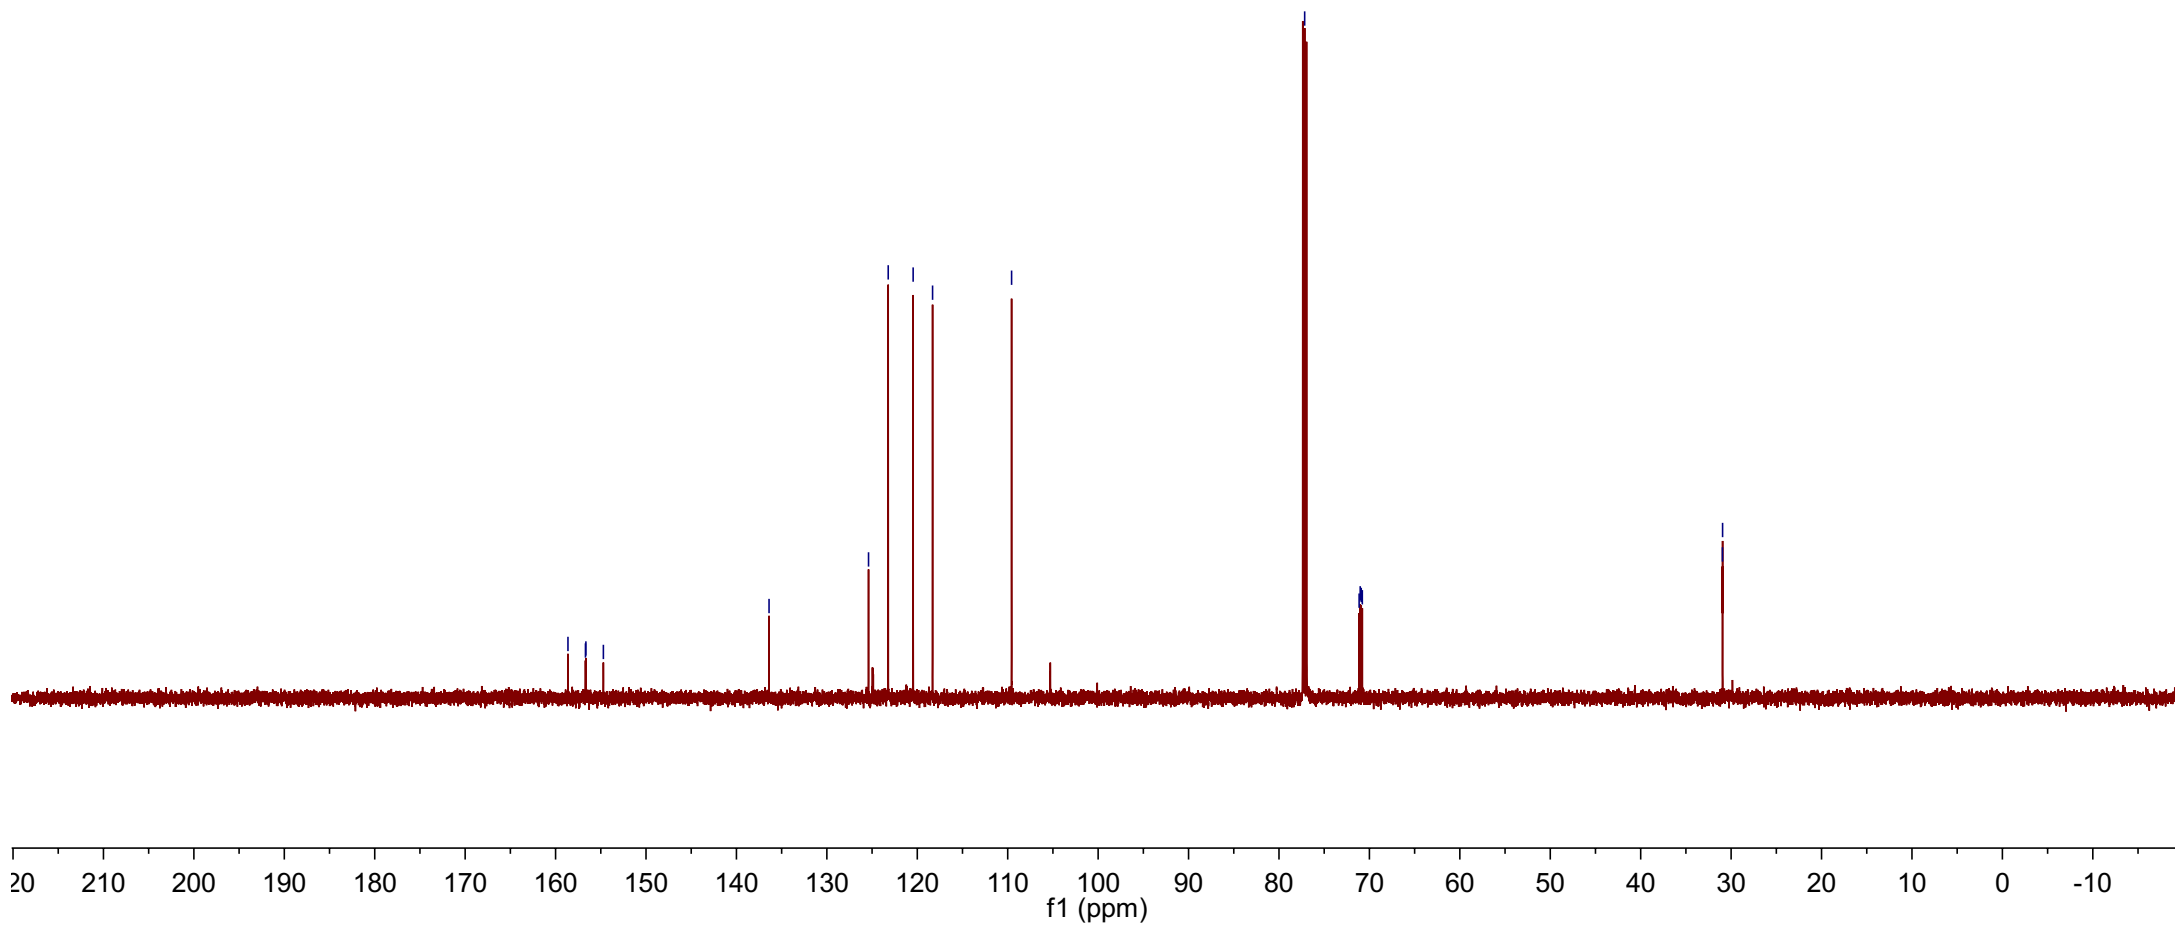

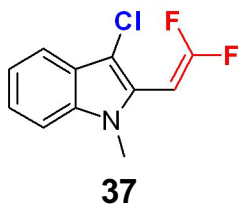

75.98  
76.00  
76.02  
76.05  
80.26  
80.28

|   | Parameter              | Value |
|---|------------------------|-------|
| 1 | Solvent                | CDC13 |
| 2 | Spectrometer Frequency | 565   |

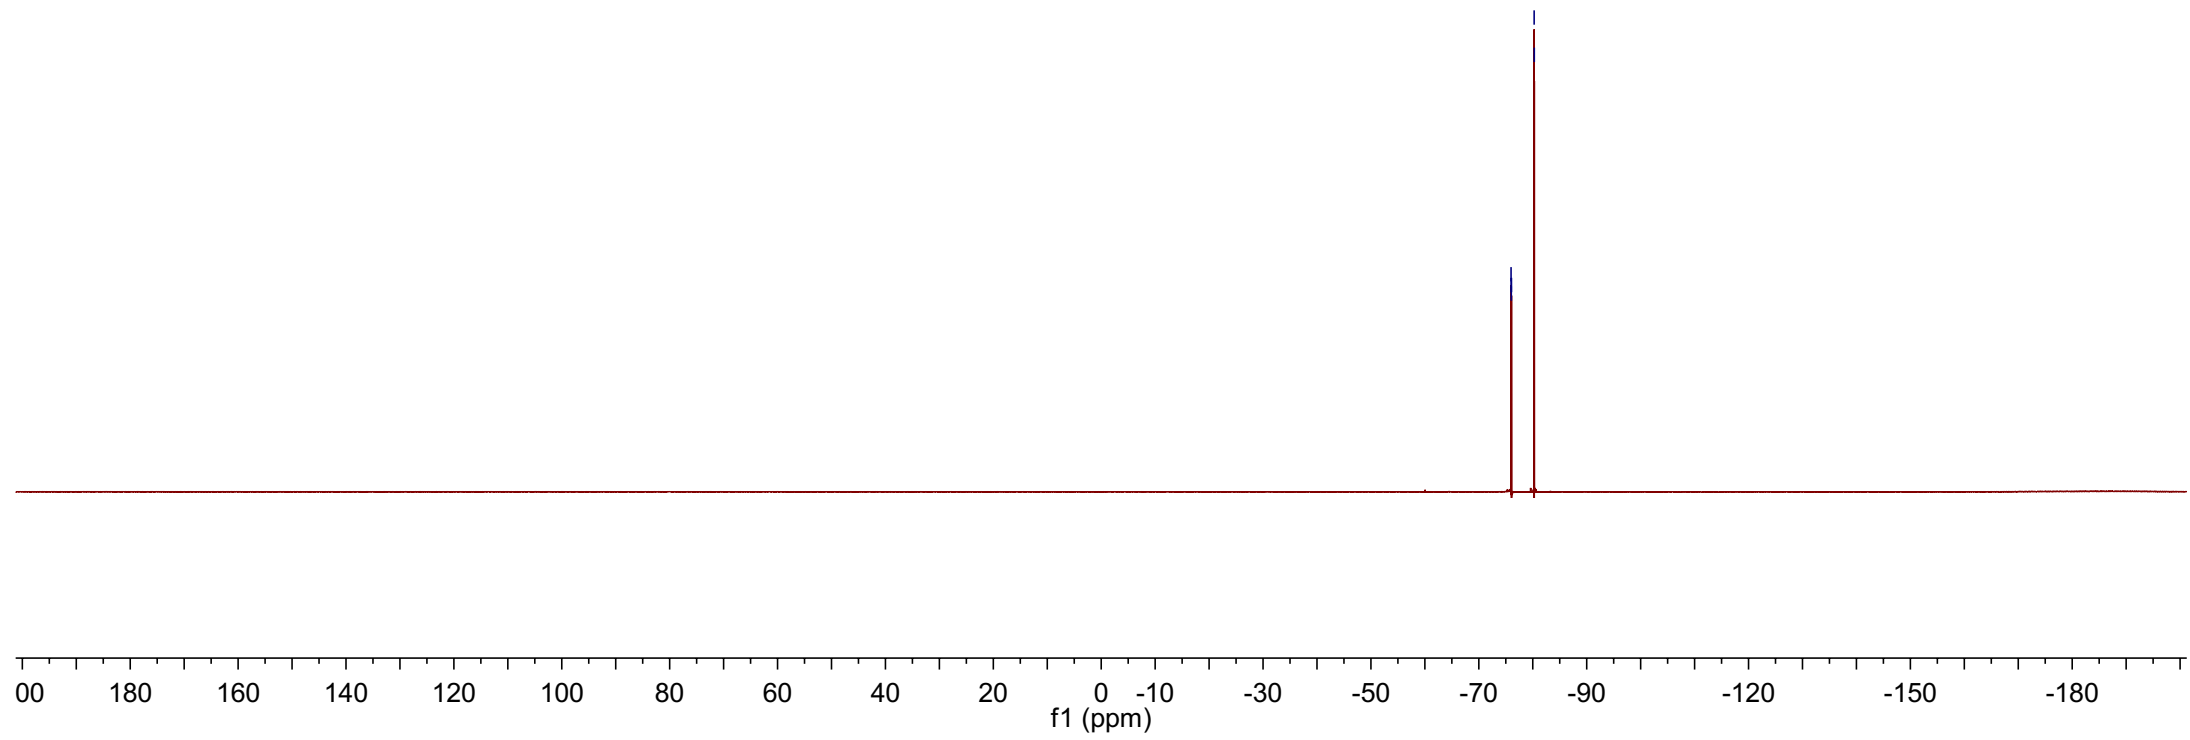

Supplement: d3qo00879g1.pdf [file d3qo00879g1.pdf]
